# Supplementary material for: Analysis of the human E2 ubiquitin conjugating enzyme protein interaction network
Source: HighWire-hosted journal article supplement (doi:10.1101/gr.093963.109), 2009-06-23
Supplement: Markson_et_al__Supp._File_6.pdf [file Markson_et_al__Supp._File_6.pdf]

## Supplementary File 6: Functional analysis of potential E2/E3-RING complexes

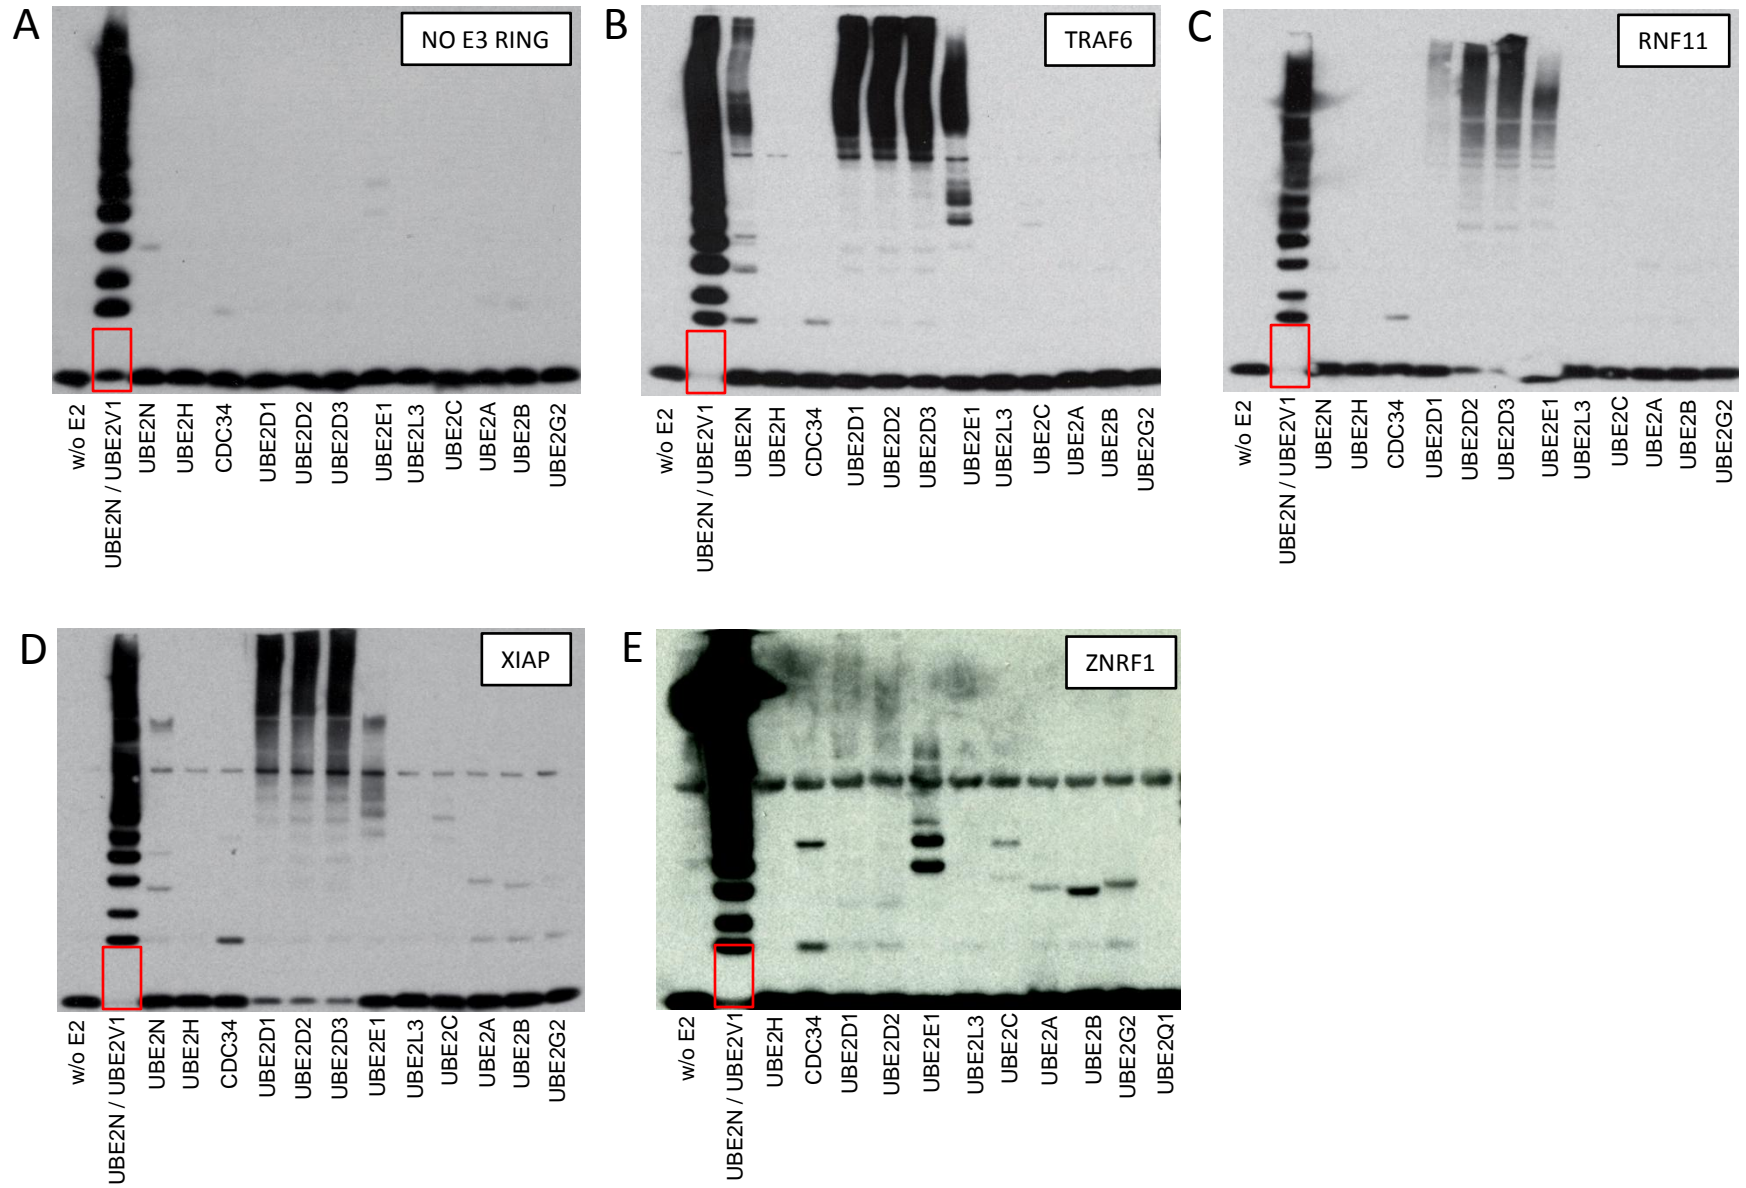

## Comparison of functional profiles and yeast two-hybrid data

|              | No E3 RING |           |           | TRAF6    |           |          | RNF11    |           |          | XIAP     |           |          | ZNRF1    |           |          |
|--------------|------------|-----------|-----------|----------|-----------|----------|----------|-----------|----------|----------|-----------|----------|----------|-----------|----------|
|              | ACTIVITY   | Y2H/ -ADE | Y2H/ -HIS | ACTIVITY | Y2H/ -ADE | Y2H/-HIS |
| wo/E2        |            |           |           |          |           |          |          |           |          |          |           |          |          |           |          |
| UBE2V1       |            |           |           | NT       |           |          | NT       |           |          | NT       |           |          | NT       |           |          |
| UBE2N/UBE2V1 |            |           |           |          | NT        | NT       |
| UBE2N        |            |           |           |          |           |          |          |           |          |          |           |          | NT       |           |          |
| UBE2H        |            |           |           |          |           |          |          |           |          |          |           |          |          |           |          |
| CDC34        |            |           |           |          |           |          |          |           |          |          |           |          |          |           |          |
| UBE2D1       |            |           |           |          |           |          |          |           |          |          |           |          |          |           |          |
| UBE2D2       |            |           |           |          |           |          |          |           |          |          |           |          |          |           |          |
| UBE2D3       |            |           |           |          |           |          |          |           |          |          |           |          | NT       |           |          |
| UBE2E1       |            |           |           |          |           |          |          |           |          |          |           |          |          |           |          |
| UBE2L3       |            |           |           |          |           |          |          |           |          |          |           |          |          |           |          |
| UBE2C        |            |           |           |          |           |          |          |           |          |          |           |          |          |           |          |
| UBE2A        |            |           |           |          |           |          |          |           |          |          |           |          |          |           |          |
| UBE2B        |            |           |           |          |           |          |          |           |          |          |           |          |          |           |          |
| UBE2G2       |            |           |           |          |           | AA       |          | AA        | AA       |          | AA        | AA       |          | AA        | AA       |
| UBE2Q        |            |           |           | NT       |           |          | NT       |           |          | NT       |           |          |          |           |          |

To assess the ability of yeast two-hybrid studies to predict functional E2/E3-RING complexes 51 different E2/E3-RING combinations were systematically tested for autoubiquitination activity *in vitro*. Activity profiles are shown in Panels A-E. Corresponding yeast two-hybrid data is shown in the chart above. RED squares indicate strong positive results in functional assays or yeast two-hybrid studies. YELLOW squares indicate a weaker positive result in either assay. Reproducible positive yeast two-hybrid interactions detected on high stringency (-ADE) or lower stringency (-HIS) plates are shown for each potential E2/E3-RING complex. White squares indicate no functional activity, or no detected interaction in yeast two-hybrid studies. UBE2G2 auto-activates (AA) in our yeast two-hybrid system and therefore does not represent a true positive interaction. UBE2N/UBE2V1 were used in combination in some activity assays, however, as these proteins were tested independently in yeast two-hybrid studies data for all potential complexes is shown. The UBE2N/UBE2V1 complex exhibits some independent auto-ubiquitination activity in the absence of E3-RING proteins (Panel A). However, this activity increases when an interacting E3-RING protein is included. This increase in activity can be monitored by observing the decrease in residual un-conjugated ubiquitin (see areas highlighted by red boxes), or an increased abundance of high molecular weight ubiquitination products (Panel E). The activity of UBE2V1 alone could not be tested (NT) as this is a catalytically inactive E2 protein., equally, interactions with the UBE2N/UBE2V1 complex were not tested (NT) in our yeast two-hybrid assays.
