# Supplementary material for: Analysis of the human E2 ubiquitin conjugating enzyme protein interaction network
Source: HighWire-hosted journal article supplement (doi:10.1101/gr.093963.109), 2009-06-23
Supplement: Markson_et_al_Supp._File_4.xlsx [file Markson_et_al_Supp._File_4.xlsx]

## Sheet: Sheet1
				Y2H Library	Matrix Data-------------------------------------------------------------------------------					THM Data---------------		Database Data------------------------------
e2Id	e2Name	e3Id	e3Name	library	intxnScore	tested	testNumber	preyVector	consistent	freeEnergy	VDW	knownHuman	interologue	predicted
7319	UBE2A	330	BIRC3	0	0	1	1	pACTBD-B	1	NA	NA	0	0	0	Notes:
7320	UBE2B	330	BIRC3	0	0	1	1	pACTBD-B	1	NA	NA	0	0	0	e2Id/e3Id are Entrez Gene identifiers
11065	UBE2C	330	BIRC3	0	0	1	1	pACTBD-B	1	NA	NA	0	0	0	e2Name/e3Name are official gene names from EntrezGene
7321	UBE2D1	330	BIRC3	0	0	1	1	pACTBD-B	1	NA	NA	0	0	0	Y2H Library
7322	UBE2D2	330	BIRC3	0	0	1	1	pACTBD-B	1	NA	NA	0	0	0		'library' column indicates whether an interaction between the E2/E3 pair was observed in library screens
7323	UBE2D3	330	BIRC3	0	0	1	1	pACTBD-B	1	NA	NA	0	0	0	Matrix Data
51619	UBE2D4	330	BIRC3	0	0	1	1	pACTBD-B	1	NA	NA	0	0	0		'intxnScore' indicates the interaction score for the E2/E3 pair on Y2H matrix screens
7324	UBE2E1	330	BIRC3	0	0	1	1	pACTBD-B	1	NA	NA	0	0	0		(5=interaction observed on both His selection and Ade selection)
10477	UBE2E3	330	BIRC3	0	0	1	1	pACTBD-B	1	NA	NA	0	0	0		(4 = interaction observed on His selection only)
7326	UBE2G1	330	BIRC3	0	0	1	1	pACTBD-B	1	NA	NA	0	0	1		(3 = interaction observed on Ade selection only)
7327	UBE2G2	330	BIRC3	0	NA	0	0	NA	1	NA	NA	0	0	0		(2 = non-reproducible interaction observed on both His and Ade selection)
7328	UBE2H	330	BIRC3	0	0	1	1	pACTBD-B	1	NA	NA	0	0	0		(1 = non-reproducible interaction observed on His selection only)
7329	UBE2I	330	BIRC3	0	0	1	2	pACTBD-B	1	NA	NA	0	0	0		(Interactions at score 4 and 5 were considered in network analysis)
7332	UBE2L3	330	BIRC3	0	0	1	2	pACTBD-B	1	NA	NA	0	0	0		tested' indicates whether the E2/E3 pair has been tested in the Y2H matrix
9246	UBE2L6	330	BIRC3	0	0	1	1	pACTBD-B	1	NA	NA	0	0	0		'testNumber' indicates how many separate tests of the E2/E3 pair were performed per matrix study
9040	UBE2M	330	BIRC3	0	0	1	1	pACTBD-B	1	NA	NA	0	0	0		'preyVector' indictates the vector which the E3 was cloned into; where multiple vectors were used for a single E3, these are indicated
7334	UBE2N	330	BIRC3	0	0	1	1	pACTBD-B	1	NA	NA	0	0	0		'consistent' indicates whether the interaction was / wasn't observed in each separate test of the E2/E3 pair (eg, where multiple sequence clones were obtained for a single E3 gene, did each clone respond consistently?)
7335	UBE2V1	330	BIRC3	0	0	1	1	pACTBD-B	1	NA	NA	0	0	0	THM Data
7336	UBE2V2	330	BIRC3	0	0	1	1	pACTBD-B	1	NA	NA	0	0	0		'freeEnergy' indicates the predicted Free Energy value for an interaction between the E2 and E3
27338	UBE2S	330	BIRC3	0	0	1	1	pACTBD-B	1	NA	NA	0	0	0		'VDW' indicates whether Van Der Waals clashes were predicted for the interaction
997	CDC34	330	BIRC3	0	0	1	1	pACTBD-B	1	NA	NA	0	0	0	Database Data
3093	HIP2	330	BIRC3	0	0	1	1	pACTBD-B	1	NA	NA	0	0	0		'knownHuman' indicates whether the E2/E3 pair interact in the human interactome
54926	UBE2R2	330	BIRC3	0	0	1	1	pACTBD-B	1	NA	NA	0	0	0		'interologue' indicates whether the E2/E3 pair are predicted to interact based on interaction studies in non-human model organisms
51465	UBE2J1	330	BIRC3	0	0	1	1	pACTBD-B	1	NA	NA	0	0	0		'predicted' indicates whether the Himap or IntNetDB databases predict an interaction to occur between the E2/E3 pair
118424	UBE2J2	330	BIRC3	0	0	1	1	pACTBD-B	1	NA	NA	0	0	0
55284	UBE2W	330	BIRC3	0	0	1	2	pACTBD-B	1	NA	NA	0	0	0
7325	UBE2E2	330	BIRC3	0	0	1	1	pACTBD-B	1	NA	NA	0	0	0
55293	UEVLD	330	BIRC3	0	0	1	2	pACTBD-B	1	NA	NA	0	0	0
65264	UBE2Z	330	BIRC3	0	0	1	2	pACTBD-B	1	NA	NA	0	0	0
64400	AKTIP	330	BIRC3	0	0	1	1	pACTBD-B	1	NA	NA	0	0	0
63893	UBE2O	330	BIRC3	0	0	1	1	pACTBD-B	1	NA	NA	0	0	0
55585	UBE2Q1	330	BIRC3	0	0	1	1	pACTBD-B	1	NA	NA	0	0	0
29089	UBE2T	330	BIRC3	0	0	1	1	pACTBD-B	1	NA	NA	0	0	0
140739	UBE2F	330	BIRC3	0	0	1	1	pACTBD-B	1	NA	NA	0	0	0
57448	BIRC6	330	BIRC3	0	0	1	1	pACTBD-B	1	NA	NA	0	0	0
148581	UBE2U	330	BIRC3	0	0	1	1	pACTBD-B	1	NA	NA	0	0	0
340561	UBE2DNL	330	BIRC3	0	0	1	1	pACTBD-B	1	NA	NA	0	0	0
92912	UBE2Q2	330	BIRC3	0	0	1	1	pACTBD-B	1	NA	NA	0	0	0
7251	TSG101	330	BIRC3	0	0	1	1	pACTBD-B	1	NA	NA	0	0	0
7319	UBE2A	867	CBL	0	0	1	1	pACTBD-B	1	NA	NA	0	0	0
7320	UBE2B	867	CBL	0	0	1	1	pACTBD-B	1	NA	NA	0	0	0
11065	UBE2C	867	CBL	0	0	1	1	pACTBD-B	1	NA	NA	0	0	0
7321	UBE2D1	867	CBL	0	0	1	1	pACTBD-B	1	NA	NA	0	0	0
7322	UBE2D2	867	CBL	0	0	1	1	pACTBD-B	1	NA	NA	1	0	0
7323	UBE2D3	867	CBL	0	0	1	1	pACTBD-B	1	NA	NA	0	0	0
51619	UBE2D4	867	CBL	0	0	1	1	pACTBD-B	1	NA	NA	0	0	0
7324	UBE2E1	867	CBL	0	0	1	1	pACTBD-B	1	NA	NA	1	0	0
10477	UBE2E3	867	CBL	0	0	1	1	pACTBD-B	1	NA	NA	0	0	0
7326	UBE2G1	867	CBL	0	0	1	1	pACTBD-B	1	NA	NA	1	0	0
7327	UBE2G2	867	CBL	0	NA	0	0	NA	1	NA	NA	1	0	0
7328	UBE2H	867	CBL	0	0	1	1	pACTBD-B	1	NA	NA	0	0	0
7329	UBE2I	867	CBL	0	0	1	2	pACTBD-B	1	NA	NA	0	0	0
7332	UBE2L3	867	CBL	0	0	1	2	pACTBD-B	1	NA	NA	1	0	0
9246	UBE2L6	867	CBL	0	0	1	1	pACTBD-B	1	NA	NA	0	0	0
9040	UBE2M	867	CBL	0	0	1	1	pACTBD-B	1	NA	NA	0	0	0
7334	UBE2N	867	CBL	0	0	1	1	pACTBD-B	1	NA	NA	0	0	0
7335	UBE2V1	867	CBL	0	0	1	1	pACTBD-B	1	NA	NA	0	0	0
7336	UBE2V2	867	CBL	0	0	1	1	pACTBD-B	1	NA	NA	0	0	0
27338	UBE2S	867	CBL	0	0	1	1	pACTBD-B	1	NA	NA	0	0	0
997	CDC34	867	CBL	0	0	1	1	pACTBD-B	1	NA	NA	0	0	0
3093	HIP2	867	CBL	0	0	1	1	pACTBD-B	1	NA	NA	0	0	0
54926	UBE2R2	867	CBL	0	0	1	1	pACTBD-B	1	NA	NA	0	0	0
51465	UBE2J1	867	CBL	0	0	1	1	pACTBD-B	1	NA	NA	0	0	0
118424	UBE2J2	867	CBL	0	0	1	1	pACTBD-B	1	NA	NA	0	0	0
55284	UBE2W	867	CBL	0	0	1	2	pACTBD-B	1	NA	NA	0	0	0
7325	UBE2E2	867	CBL	0	0	1	1	pACTBD-B	1	NA	NA	0	0	0
55293	UEVLD	867	CBL	0	0	1	2	pACTBD-B	1	NA	NA	0	0	0
65264	UBE2Z	867	CBL	0	0	1	2	pACTBD-B	1	NA	NA	0	0	0
64400	AKTIP	867	CBL	0	0	1	1	pACTBD-B	1	NA	NA	0	0	0
63893	UBE2O	867	CBL	0	0	1	1	pACTBD-B	1	NA	NA	0	0	0
55585	UBE2Q1	867	CBL	0	0	1	1	pACTBD-B	1	NA	NA	0	0	0
29089	UBE2T	867	CBL	0	0	1	1	pACTBD-B	1	NA	NA	0	0	0
140739	UBE2F	867	CBL	0	0	1	1	pACTBD-B	1	NA	NA	0	0	0
57448	BIRC6	867	CBL	0	0	1	1	pACTBD-B	1	NA	NA	0	0	0
148581	UBE2U	867	CBL	0	0	1	1	pACTBD-B	1	NA	NA	0	0	0
340561	UBE2DNL	867	CBL	0	0	1	1	pACTBD-B	1	NA	NA	0	0	0
92912	UBE2Q2	867	CBL	0	0	1	1	pACTBD-B	1	NA	NA	0	0	0
7251	TSG101	867	CBL	0	0	1	1	pACTBD-B	1	NA	NA	0	0	0
7319	UBE2A	331	BIRC4	0	0	1	2	pACTBD-B	1	-7.329	0	0	0	0
7320	UBE2B	331	BIRC4	0	0	1	2	pACTBD-B	1	-8.862	0	0	0	0
11065	UBE2C	331	BIRC4	0	0	1	2	pACTBD-B	1	-11.064	0	0	0	0
7321	UBE2D1	331	BIRC4	0	5	1	2	pACTBD-B	1	-10.193	0	0	0	0
7322	UBE2D2	331	BIRC4	0	5	1	2	pACTBD-B	1	-12.009	0	0	0	0
7323	UBE2D3	331	BIRC4	0	5	1	2	pACTBD-B	1	-12.013	0	0	0	0
51619	UBE2D4	331	BIRC4	0	5	1	2	pACTBD-B	1	-11.985	0	0	0	0
7324	UBE2E1	331	BIRC4	0	1	1	2	pACTBD-B	1	-12.849	0	0	0	0
10477	UBE2E3	331	BIRC4	0	1	1	2	pACTBD-B	1	-11.273	0	0	0	0
7326	UBE2G1	331	BIRC4	0	0	1	2	pACTBD-B	1	NA	NA	0	0	0
7327	UBE2G2	331	BIRC4	0	NA	0	0	NA	1	NA	NA	0	0	0
7328	UBE2H	331	BIRC4	0	0	1	2	pACTBD-B	1	-7.443	0	0	0	0
7329	UBE2I	331	BIRC4	0	0	1	4	pACTBD-B	1	-7.734	0	0	0	0
7332	UBE2L3	331	BIRC4	0	0	1	4	pACTBD-B	1	-10.773	0	0	0	0
9246	UBE2L6	331	BIRC4	0	0	1	2	pACTBD-B	1	-11.425	0	0	0	0
9040	UBE2M	331	BIRC4	0	0	1	2	pACTBD-B	1	NA	NA	0	0	0
7334	UBE2N	331	BIRC4	0	5	1	2	pACTBD-B	1	-11.284	0	0	0	0
7335	UBE2V1	331	BIRC4	0	4	1	2	pACTBD-B	1	-3.917	0	0	0	0
7336	UBE2V2	331	BIRC4	0	4	1	2	pACTBD-B	1	-3.917	0	0	0	0
27338	UBE2S	331	BIRC4	0	0	1	2	pACTBD-B	1	NA	NA	0	0	0
997	CDC34	331	BIRC4	0	0	1	2	pACTBD-B	1	-10.472	0	0	0	0
3093	HIP2	331	BIRC4	0	0	1	2	pACTBD-B	1	-12.239	0	0	0	0
54926	UBE2R2	331	BIRC4	0	0	1	2	pACTBD-B	1	-9.912	0	0	0	0
51465	UBE2J1	331	BIRC4	0	0	1	2	pACTBD-B	1	-10.268	0	0	0	0
118424	UBE2J2	331	BIRC4	0	4	1	2	pACTBD-B	1	-9.945	0	0	0	0
55284	UBE2W	331	BIRC4	0	4	1	4	pACTBD-B	1	-12.401	0	0	0	0
7325	UBE2E2	331	BIRC4	0	4	1	2	pACTBD-B	0	-9.179	0	0	0	0
55293	UEVLD	331	BIRC4	0	0	1	4	pACTBD-B	1	NA	NA	0	0	0
65264	UBE2Z	331	BIRC4	0	0	1	4	pACTBD-B	1	NA	NA	0	0	0
64400	AKTIP	331	BIRC4	0	0	1	2	pACTBD-B	1	-9.643	0	0	0	0
63893	UBE2O	331	BIRC4	0	0	1	2	pACTBD-B	1	-6.806	0	0	0	0
55585	UBE2Q1	331	BIRC4	0	0	1	2	pACTBD-B	1	-7.572	0	0	0	0
29089	UBE2T	331	BIRC4	0	0	1	2	pACTBD-B	1	-11.337	0	0	0	0
140739	UBE2F	331	BIRC4	0	0	1	2	pACTBD-B	1	NA	NA	0	0	0
57448	BIRC6	331	BIRC4	0	0	1	2	pACTBD-B	1	-9.696	0	0	0	0
148581	UBE2U	331	BIRC4	0	0	1	2	pACTBD-B	1	NA	NA	0	0	0
340561	UBE2DNL	331	BIRC4	0	0	1	2	pACTBD-B	1	NA	NA	0	0	0
92912	UBE2Q2	331	BIRC4	0	0	1	2	pACTBD-B	1	-7.572	0	0	0	0
7251	TSG101	331	BIRC4	0	0	1	2	pACTBD-B	1	-3.909	0	0	0	0
7319	UBE2A	79444	BIRC7	0	0	1	1	pACTBD-B	1	NA	NA	0	0	0
7320	UBE2B	79444	BIRC7	0	0	1	1	pACTBD-B	1	NA	NA	0	0	0
11065	UBE2C	79444	BIRC7	0	0	1	1	pACTBD-B	1	NA	NA	0	0	0
7321	UBE2D1	79444	BIRC7	0	1	1	1	pACTBD-B	1	NA	NA	0	0	0
7322	UBE2D2	79444	BIRC7	0	0	1	1	pACTBD-B	1	NA	NA	0	0	0
7323	UBE2D3	79444	BIRC7	0	1	1	1	pACTBD-B	1	NA	NA	0	0	0
51619	UBE2D4	79444	BIRC7	0	0	1	1	pACTBD-B	1	NA	NA	0	0	0
7324	UBE2E1	79444	BIRC7	0	0	1	1	pACTBD-B	1	NA	NA	0	0	0
10477	UBE2E3	79444	BIRC7	0	0	1	1	pACTBD-B	1	NA	NA	0	0	0
7326	UBE2G1	79444	BIRC7	0	0	1	1	pACTBD-B	1	NA	NA	0	0	0
7327	UBE2G2	79444	BIRC7	0	NA	0	0	NA	1	NA	NA	0	0	0
7328	UBE2H	79444	BIRC7	0	0	1	1	pACTBD-B	1	NA	NA	0	0	0
7329	UBE2I	79444	BIRC7	0	0	1	2	pACTBD-B	1	NA	NA	0	0	0
7332	UBE2L3	79444	BIRC7	0	0	1	2	pACTBD-B	1	NA	NA	0	0	0
9246	UBE2L6	79444	BIRC7	0	0	1	1	pACTBD-B	1	NA	NA	0	0	0
9040	UBE2M	79444	BIRC7	0	0	1	1	pACTBD-B	1	NA	NA	0	0	0
7334	UBE2N	79444	BIRC7	0	1	1	1	pACTBD-B	1	NA	NA	0	0	0
7335	UBE2V1	79444	BIRC7	0	0	1	1	pACTBD-B	1	NA	NA	0	0	0
7336	UBE2V2	79444	BIRC7	0	0	1	1	pACTBD-B	1	NA	NA	0	0	0
27338	UBE2S	79444	BIRC7	0	0	1	1	pACTBD-B	1	NA	NA	0	0	0
997	CDC34	79444	BIRC7	0	0	1	1	pACTBD-B	1	NA	NA	0	0	0
3093	HIP2	79444	BIRC7	0	4	1	1	pACTBD-B	1	NA	NA	0	0	0
54926	UBE2R2	79444	BIRC7	0	0	1	1	pACTBD-B	1	NA	NA	0	0	0
51465	UBE2J1	79444	BIRC7	0	0	1	1	pACTBD-B	1	NA	NA	0	0	0
118424	UBE2J2	79444	BIRC7	0	0	1	1	pACTBD-B	1	NA	NA	0	0	0
55284	UBE2W	79444	BIRC7	0	0	1	2	pACTBD-B	1	NA	NA	0	0	0
7325	UBE2E2	79444	BIRC7	0	0	1	1	pACTBD-B	1	NA	NA	0	0	0
55293	UEVLD	79444	BIRC7	0	0	1	2	pACTBD-B	1	NA	NA	0	0	0
65264	UBE2Z	79444	BIRC7	0	0	1	2	pACTBD-B	1	NA	NA	0	0	0
64400	AKTIP	79444	BIRC7	0	0	1	1	pACTBD-B	1	NA	NA	0	0	0
63893	UBE2O	79444	BIRC7	0	0	1	1	pACTBD-B	1	NA	NA	0	0	0
55585	UBE2Q1	79444	BIRC7	0	0	1	1	pACTBD-B	1	NA	NA	0	0	0
29089	UBE2T	79444	BIRC7	0	0	1	1	pACTBD-B	1	NA	NA	0	0	0
140739	UBE2F	79444	BIRC7	0	0	1	1	pACTBD-B	1	NA	NA	0	0	0
57448	BIRC6	79444	BIRC7	0	0	1	1	pACTBD-B	1	NA	NA	0	0	0
148581	UBE2U	79444	BIRC7	0	0	1	1	pACTBD-B	1	NA	NA	0	0	0
340561	UBE2DNL	79444	BIRC7	0	0	1	1	pACTBD-B	1	NA	NA	0	0	0
92912	UBE2Q2	79444	BIRC7	0	0	1	1	pACTBD-B	1	NA	NA	0	0	0
7251	TSG101	79444	BIRC7	0	0	1	1	pACTBD-B	1	NA	NA	0	0	0
7319	UBE2A	7189	TRAF6	0	0	1	2	pACTBD-B	1	-7.159	0	0	0	0
7320	UBE2B	7189	TRAF6	0	0	1	2	pACTBD-B	1	-7.792	0	0	0	0
11065	UBE2C	7189	TRAF6	0	0	1	2	pACTBD-B	1	-7.364	0	0	0	0
7321	UBE2D1	7189	TRAF6	0	4	1	2	pACTBD-B	1	-10.333	0	0	0	0
7322	UBE2D2	7189	TRAF6	0	4	1	2	pACTBD-B	1	-10.659	0	0	0	0
7323	UBE2D3	7189	TRAF6	0	4	1	2	pACTBD-B	1	-10.693	0	1	0	0
51619	UBE2D4	7189	TRAF6	0	4	1	2	pACTBD-B	1	-10.245	0	0	0	0
7324	UBE2E1	7189	TRAF6	0	0	1	2	pACTBD-B	1	-9.499	0	0	0	0
10477	UBE2E3	7189	TRAF6	0	0	1	2	pACTBD-B	1	-11.063	0	0	0	0
7326	UBE2G1	7189	TRAF6	0	0	1	2	pACTBD-B	1	NA	NA	0	0	0
7327	UBE2G2	7189	TRAF6	0	NA	0	0	NA	1	NA	NA	0	0	0
7328	UBE2H	7189	TRAF6	0	0	1	2	pACTBD-B	1	-9.473	0	0	0	0
7329	UBE2I	7189	TRAF6	0	0	1	4	pACTBD-B	1	-6.944	0	0	0	0
7332	UBE2L3	7189	TRAF6	0	0	1	4	pACTBD-B	1	-9.783	0	1	0	0
9246	UBE2L6	7189	TRAF6	0	0	1	2	pACTBD-B	1	-11.805	0	0	0	0
9040	UBE2M	7189	TRAF6	0	0	1	2	pACTBD-B	1	NA	NA	1	0	0
7334	UBE2N	7189	TRAF6	0	5	1	2	pACTBD-B	1	-10.294	0	0	0	0
7335	UBE2V1	7189	TRAF6	0	1	1	2	pACTBD-B	1	-2.377	0	0	0	0
7336	UBE2V2	7189	TRAF6	0	0	1	2	pACTBD-B	1	-2.377	0	1	0	0
27338	UBE2S	7189	TRAF6	0	0	1	2	pACTBD-B	1	NA	NA	0	0	0
997	CDC34	7189	TRAF6	0	0	1	2	pACTBD-B	1	-8.252	0	0	0	0
3093	HIP2	7189	TRAF6	0	0	1	2	pACTBD-B	1	-9.959	0	0	0	0
54926	UBE2R2	7189	TRAF6	0	0	1	2	pACTBD-B	1	-6.922	0	0	0	0
51465	UBE2J1	7189	TRAF6	0	0	1	2	pACTBD-B	1	-7.658	1	0	0	0
118424	UBE2J2	7189	TRAF6	0	0	1	2	pACTBD-B	1	-9.825	0	0	0	0
55284	UBE2W	7189	TRAF6	0	0	1	4	pACTBD-B	1	-9.471	0	0	0	0
7325	UBE2E2	7189	TRAF6	0	0	1	2	pACTBD-B	1	-10.139	0	0	0	0
55293	UEVLD	7189	TRAF6	0	4	1	4	pACTBD-B	0	NA	NA	0	0	0
65264	UBE2Z	7189	TRAF6	0	0	1	4	pACTBD-B	1	NA	NA	0	0	0
64400	AKTIP	7189	TRAF6	0	0	1	2	pACTBD-B	1	-7.013	0	0	0	0
63893	UBE2O	7189	TRAF6	0	0	1	2	pACTBD-B	1	-4.936	0	0	0	0
55585	UBE2Q1	7189	TRAF6	0	0	1	2	pACTBD-B	1	-6.552	0	0	0	0
29089	UBE2T	7189	TRAF6	0	0	1	2	pACTBD-B	1	-9.067	0	0	0	0
140739	UBE2F	7189	TRAF6	0	0	1	2	pACTBD-B	1	NA	NA	0	0	0
57448	BIRC6	7189	TRAF6	0	0	1	2	pACTBD-B	1	-9.276	0	0	0	0
148581	UBE2U	7189	TRAF6	0	0	1	2	pACTBD-B	1	NA	NA	0	0	0
340561	UBE2DNL	7189	TRAF6	0	0	1	2	pACTBD-B	1	NA	NA	0	0	0
92912	UBE2Q2	7189	TRAF6	0	0	1	2	pACTBD-B	1	-6.552	0	0	0	0
7251	TSG101	7189	TRAF6	0	0	1	2	pACTBD-B	1	-5.279	0	0	0	0
7319	UBE2A	56852	RAD18	0	5	1	2	pACTBD-B	1	-8.319	0	1	1	0
7320	UBE2B	56852	RAD18	1	5	1	2	pACTBD-B	1	-8.612	0	1	1	0
11065	UBE2C	56852	RAD18	0	0	1	2	pACTBD-B	1	-7.574	0	0	0	0
7321	UBE2D1	56852	RAD18	0	0	1	2	pACTBD-B	1	-11.673	0	0	0	0
7322	UBE2D2	56852	RAD18	0	0	1	2	pACTBD-B	1	-10.499	0	0	0	0
7323	UBE2D3	56852	RAD18	0	0	1	2	pACTBD-B	1	-10.583	0	0	0	0
51619	UBE2D4	56852	RAD18	0	0	1	2	pACTBD-B	1	-13.815	0	0	0	0
7324	UBE2E1	56852	RAD18	0	0	1	2	pACTBD-B	1	-12.339	0	0	0	0
10477	UBE2E3	56852	RAD18	0	0	1	2	pACTBD-B	1	-12.263	0	0	0	0
7326	UBE2G1	56852	RAD18	0	0	1	2	pACTBD-B	1	NA	NA	0	0	0
7327	UBE2G2	56852	RAD18	0	NA	0	0	NA	1	NA	NA	0	0	0
7328	UBE2H	56852	RAD18	0	0	1	2	pACTBD-B	1	-8.403	0	0	0	0
7329	UBE2I	56852	RAD18	0	4	1	4	pACTBD-B	0	-8.474	0	0	0	0
7332	UBE2L3	56852	RAD18	0	0	1	4	pACTBD-B	1	-10.453	0	0	0	0
9246	UBE2L6	56852	RAD18	0	0	1	2	pACTBD-B	1	-12.305	0	0	0	0
9040	UBE2M	56852	RAD18	0	0	1	2	pACTBD-B	1	NA	NA	0	0	0
7334	UBE2N	56852	RAD18	0	0	1	2	pACTBD-B	1	-8.824	0	0	1	1
7335	UBE2V1	56852	RAD18	0	0	1	2	pACTBD-B	1	-6.447	0	0	0	0
7336	UBE2V2	56852	RAD18	0	0	1	2	pACTBD-B	1	-6.447	0	0	0	0
27338	UBE2S	56852	RAD18	0	0	1	2	pACTBD-B	1	NA	NA	0	0	0
997	CDC34	56852	RAD18	0	0	1	2	pACTBD-B	1	-4.642	0	0	0	0
3093	HIP2	56852	RAD18	0	0	1	2	pACTBD-B	1	-12.039	0	0	0	0
54926	UBE2R2	56852	RAD18	0	0	1	2	pACTBD-B	1	-4.542	0	0	0	0
51465	UBE2J1	56852	RAD18	0	0	1	2	pACTBD-B	1	-7.788	0	0	0	0
118424	UBE2J2	56852	RAD18	0	0	1	2	pACTBD-B	1	-10.255	0	0	0	0
55284	UBE2W	56852	RAD18	0	0	1	4	pACTBD-B	1	-11.751	0	0	0	0
7325	UBE2E2	56852	RAD18	0	0	1	2	pACTBD-B	1	-12.019	0	0	0	0
55293	UEVLD	56852	RAD18	0	0	1	4	pACTBD-B	1	NA	NA	0	0	0
65264	UBE2Z	56852	RAD18	0	0	1	4	pACTBD-B	1	NA	NA	0	0	0
64400	AKTIP	56852	RAD18	0	0	1	2	pACTBD-B	1	-7.223	0	0	0	0
63893	UBE2O	56852	RAD18	0	0	1	2	pACTBD-B	1	-6.046	0	0	0	0
55585	UBE2Q1	56852	RAD18	0	0	1	2	pACTBD-B	1	-7.522	0	0	0	0
29089	UBE2T	56852	RAD18	0	0	1	2	pACTBD-B	1	-13.707	0	0	0	0
140739	UBE2F	56852	RAD18	0	0	1	2	pACTBD-B	1	NA	NA	0	0	0
57448	BIRC6	56852	RAD18	0	0	1	2	pACTBD-B	1	-8.626	0	0	0	0
148581	UBE2U	56852	RAD18	0	0	1	2	pACTBD-B	1	NA	NA	0	0	0
340561	UBE2DNL	56852	RAD18	0	0	1	2	pACTBD-B	1	NA	NA	0	0	0
92912	UBE2Q2	56852	RAD18	0	0	1	2	pACTBD-B	1	-7.522	0	0	0	0
7251	TSG101	56852	RAD18	0	4	1	2	pACTBD-B	0	3.01	0	0	0	0
7319	UBE2A	112401	BIRC8	0	0	1	1	pACTBD-B	1	-6.569	0	0	0	0
7320	UBE2B	112401	BIRC8	0	0	1	1	pACTBD-B	1	-8.872	0	0	0	0
11065	UBE2C	112401	BIRC8	0	0	1	1	pACTBD-B	1	-10.934	0	0	0	0
7321	UBE2D1	112401	BIRC8	0	4	1	1	pACTBD-B	1	-10.913	0	0	0	0
7322	UBE2D2	112401	BIRC8	0	4	1	1	pACTBD-B	1	-10.249	0	0	0	0
7323	UBE2D3	112401	BIRC8	0	4	1	1	pACTBD-B	1	-9.663	0	0	0	0
51619	UBE2D4	112401	BIRC8	0	4	1	1	pACTBD-B	1	-11.605	0	0	0	0
7324	UBE2E1	112401	BIRC8	0	4	1	1	pACTBD-B	1	-10.369	0	0	0	0
10477	UBE2E3	112401	BIRC8	0	0	1	1	pACTBD-B	1	-10.833	0	0	0	0
7326	UBE2G1	112401	BIRC8	0	0	1	1	pACTBD-B	1	NA	NA	0	0	0
7327	UBE2G2	112401	BIRC8	0	NA	0	0	NA	1	NA	NA	0	0	0
7328	UBE2H	112401	BIRC8	0	0	1	1	pACTBD-B	1	-7.713	0	0	0	0
7329	UBE2I	112401	BIRC8	0	0	1	2	pACTBD-B	1	-6.814	0	0	0	0
7332	UBE2L3	112401	BIRC8	0	0	1	2	pACTBD-B	1	-9.823	0	0	0	0
9246	UBE2L6	112401	BIRC8	0	0	1	1	pACTBD-B	1	-8.875	0	0	0	0
9040	UBE2M	112401	BIRC8	0	0	1	1	pACTBD-B	1	NA	NA	0	0	0
7334	UBE2N	112401	BIRC8	0	4	1	1	pACTBD-B	1	-11.154	0	0	0	0
7335	UBE2V1	112401	BIRC8	0	4	1	1	pACTBD-B	1	-3.897	0	0	0	0
7336	UBE2V2	112401	BIRC8	0	0	1	1	pACTBD-B	1	-3.897	0	0	0	0
27338	UBE2S	112401	BIRC8	0	0	1	1	pACTBD-B	1	NA	NA	0	0	0
997	CDC34	112401	BIRC8	0	0	1	1	pACTBD-B	1	-9.202	0	0	0	0
3093	HIP2	112401	BIRC8	0	4	1	1	pACTBD-B	1	-10.449	0	0	0	0
54926	UBE2R2	112401	BIRC8	0	0	1	1	pACTBD-B	1	-10.432	0	0	0	0
51465	UBE2J1	112401	BIRC8	0	0	1	1	pACTBD-B	1	-11.208	0	0	0	0
118424	UBE2J2	112401	BIRC8	0	0	1	1	pACTBD-B	1	-8.915	0	0	0	0
55284	UBE2W	112401	BIRC8	0	4	1	2	pACTBD-B	1	-11.641	0	0	0	0
7325	UBE2E2	112401	BIRC8	0	0	1	1	pACTBD-B	1	-11.139	0	0	0	0
55293	UEVLD	112401	BIRC8	0	0	1	2	pACTBD-B	1	NA	NA	0	0	0
65264	UBE2Z	112401	BIRC8	0	0	1	2	pACTBD-B	1	NA	NA	0	0	0
64400	AKTIP	112401	BIRC8	0	0	1	1	pACTBD-B	1	-8.273	0	0	0	0
63893	UBE2O	112401	BIRC8	0	0	1	1	pACTBD-B	1	-5.366	0	0	0	0
55585	UBE2Q1	112401	BIRC8	0	0	1	1	pACTBD-B	1	-5.202	0	0	0	0
29089	UBE2T	112401	BIRC8	0	0	1	1	pACTBD-B	1	-12.577	0	0	0	0
140739	UBE2F	112401	BIRC8	0	0	1	1	pACTBD-B	1	NA	NA	0	0	0
57448	BIRC6	112401	BIRC8	0	0	1	1	pACTBD-B	1	-7.776	0	0	0	0
148581	UBE2U	112401	BIRC8	0	0	1	1	pACTBD-B	1	NA	NA	0	0	0
340561	UBE2DNL	112401	BIRC8	0	0	1	1	pACTBD-B	1	NA	NA	0	0	0
92912	UBE2Q2	112401	BIRC8	0	0	1	1	pACTBD-B	1	-5.202	0	0	0	0
7251	TSG101	112401	BIRC8	0	0	1	1	pACTBD-B	1	-3.019	0	0	0	0
7319	UBE2A	329	BIRC2	0	0	1	1	pACTBD-B	1	NA	NA	0	0	1
7320	UBE2B	329	BIRC2	0	0	1	1	pACTBD-B	1	NA	NA	0	0	0
11065	UBE2C	329	BIRC2	0	0	1	1	pACTBD-B	1	NA	NA	0	0	0
7321	UBE2D1	329	BIRC2	0	0	1	1	pACTBD-B	1	NA	NA	0	0	0
7322	UBE2D2	329	BIRC2	0	0	1	1	pACTBD-B	1	NA	NA	0	0	0
7323	UBE2D3	329	BIRC2	0	0	1	1	pACTBD-B	1	NA	NA	0	0	1
51619	UBE2D4	329	BIRC2	0	0	1	1	pACTBD-B	1	NA	NA	0	0	0
7324	UBE2E1	329	BIRC2	0	0	1	1	pACTBD-B	1	NA	NA	0	0	0
10477	UBE2E3	329	BIRC2	0	0	1	1	pACTBD-B	1	NA	NA	0	0	1
7326	UBE2G1	329	BIRC2	0	0	1	1	pACTBD-B	1	NA	NA	0	0	0
7327	UBE2G2	329	BIRC2	0	NA	0	0	NA	1	NA	NA	0	0	1
7328	UBE2H	329	BIRC2	0	0	1	1	pACTBD-B	1	NA	NA	0	0	0
7329	UBE2I	329	BIRC2	0	0	1	2	pACTBD-B	1	NA	NA	0	0	0
7332	UBE2L3	329	BIRC2	0	0	1	2	pACTBD-B	1	NA	NA	0	0	0
9246	UBE2L6	329	BIRC2	0	0	1	1	pACTBD-B	1	NA	NA	0	0	0
9040	UBE2M	329	BIRC2	0	0	1	1	pACTBD-B	1	NA	NA	0	0	0
7334	UBE2N	329	BIRC2	0	0	1	1	pACTBD-B	1	NA	NA	0	0	0
7335	UBE2V1	329	BIRC2	0	0	1	1	pACTBD-B	1	NA	NA	0	0	0
7336	UBE2V2	329	BIRC2	0	0	1	1	pACTBD-B	1	NA	NA	0	0	0
27338	UBE2S	329	BIRC2	0	0	1	1	pACTBD-B	1	NA	NA	0	0	0
997	CDC34	329	BIRC2	0	0	1	1	pACTBD-B	1	NA	NA	0	0	0
3093	HIP2	329	BIRC2	0	0	1	1	pACTBD-B	1	NA	NA	0	0	1
54926	UBE2R2	329	BIRC2	0	0	1	1	pACTBD-B	1	NA	NA	0	0	0
51465	UBE2J1	329	BIRC2	0	0	1	1	pACTBD-B	1	NA	NA	1	0	0
118424	UBE2J2	329	BIRC2	0	0	1	1	pACTBD-B	1	NA	NA	0	0	0
55284	UBE2W	329	BIRC2	0	0	1	2	pACTBD-B	1	NA	NA	0	0	0
7325	UBE2E2	329	BIRC2	0	0	1	1	pACTBD-B	1	NA	NA	0	0	0
55293	UEVLD	329	BIRC2	0	0	1	2	pACTBD-B	1	NA	NA	0	0	0
65264	UBE2Z	329	BIRC2	0	0	1	2	pACTBD-B	1	NA	NA	0	0	0
64400	AKTIP	329	BIRC2	0	0	1	1	pACTBD-B	1	NA	NA	0	0	0
63893	UBE2O	329	BIRC2	0	0	1	1	pACTBD-B	1	NA	NA	0	0	0
55585	UBE2Q1	329	BIRC2	0	0	1	1	pACTBD-B	1	NA	NA	0	0	0
29089	UBE2T	329	BIRC2	0	0	1	1	pACTBD-B	1	NA	NA	0	0	0
140739	UBE2F	329	BIRC2	0	0	1	1	pACTBD-B	1	NA	NA	0	0	0
57448	BIRC6	329	BIRC2	0	0	1	1	pACTBD-B	1	NA	NA	0	0	0
148581	UBE2U	329	BIRC2	0	0	1	1	pACTBD-B	1	NA	NA	0	0	0
340561	UBE2DNL	329	BIRC2	0	0	1	1	pACTBD-B	1	NA	NA	0	0	0
92912	UBE2Q2	329	BIRC2	0	0	1	1	pACTBD-B	1	NA	NA	0	0	0
7251	TSG101	329	BIRC2	0	0	1	1	pACTBD-B	1	NA	NA	0	0	0
7319	UBE2A	4193	MDM2	0	0	1	2	pACTBD-B	1	NA	NA	1	0	0
7320	UBE2B	4193	MDM2	0	0	1	2	pACTBD-B	1	NA	NA	0	0	0
11065	UBE2C	4193	MDM2	0	0	1	2	pACTBD-B	1	NA	NA	0	0	0
7321	UBE2D1	4193	MDM2	0	0	1	2	pACTBD-B	1	NA	NA	0	0	0
7322	UBE2D2	4193	MDM2	0	0	1	2	pACTBD-B	1	NA	NA	0	0	0
7323	UBE2D3	4193	MDM2	0	0	1	2	pACTBD-B	1	NA	NA	0	0	0
51619	UBE2D4	4193	MDM2	0	0	1	2	pACTBD-B	1	NA	NA	0	0	0
7324	UBE2E1	4193	MDM2	0	0	1	2	pACTBD-B	1	NA	NA	0	0	0
10477	UBE2E3	4193	MDM2	0	0	1	2	pACTBD-B	1	NA	NA	0	0	0
7326	UBE2G1	4193	MDM2	0	0	1	2	pACTBD-B	1	NA	NA	0	0	0
7327	UBE2G2	4193	MDM2	0	NA	0	0	NA	1	NA	NA	0	0	0
7328	UBE2H	4193	MDM2	0	0	1	2	pACTBD-B	1	NA	NA	0	0	0
7329	UBE2I	4193	MDM2	0	0	1	4	pACTBD-B	1	NA	NA	0	0	0
7332	UBE2L3	4193	MDM2	0	0	1	4	pACTBD-B	1	NA	NA	0	0	0
9246	UBE2L6	4193	MDM2	0	0	1	2	pACTBD-B	1	NA	NA	0	0	0
9040	UBE2M	4193	MDM2	0	0	1	2	pACTBD-B	1	NA	NA	0	0	0
7334	UBE2N	4193	MDM2	0	0	1	2	pACTBD-B	1	NA	NA	0	0	0
7335	UBE2V1	4193	MDM2	0	0	1	2	pACTBD-B	1	NA	NA	0	0	0
7336	UBE2V2	4193	MDM2	0	0	1	2	pACTBD-B	1	NA	NA	0	0	0
27338	UBE2S	4193	MDM2	0	0	1	2	pACTBD-B	1	NA	NA	0	0	0
997	CDC34	4193	MDM2	0	0	1	2	pACTBD-B	1	NA	NA	0	0	0
3093	HIP2	4193	MDM2	0	0	1	2	pACTBD-B	1	NA	NA	0	0	0
54926	UBE2R2	4193	MDM2	0	0	1	2	pACTBD-B	1	NA	NA	0	0	0
51465	UBE2J1	4193	MDM2	0	0	1	2	pACTBD-B	1	NA	NA	0	0	0
118424	UBE2J2	4193	MDM2	0	0	1	2	pACTBD-B	1	NA	NA	0	0	0
55284	UBE2W	4193	MDM2	0	0	1	4	pACTBD-B	1	NA	NA	0	0	0
7325	UBE2E2	4193	MDM2	0	0	1	2	pACTBD-B	1	NA	NA	0	0	0
55293	UEVLD	4193	MDM2	0	0	1	4	pACTBD-B	1	NA	NA	0	0	0
65264	UBE2Z	4193	MDM2	0	0	1	4	pACTBD-B	1	NA	NA	0	0	0
64400	AKTIP	4193	MDM2	0	0	1	2	pACTBD-B	1	NA	NA	0	0	0
63893	UBE2O	4193	MDM2	0	0	1	2	pACTBD-B	1	NA	NA	0	0	0
55585	UBE2Q1	4193	MDM2	0	0	1	2	pACTBD-B	1	NA	NA	0	0	0
29089	UBE2T	4193	MDM2	0	0	1	2	pACTBD-B	1	NA	NA	0	0	0
140739	UBE2F	4193	MDM2	0	0	1	2	pACTBD-B	1	NA	NA	0	0	0
57448	BIRC6	4193	MDM2	0	0	1	2	pACTBD-B	1	NA	NA	0	0	0
148581	UBE2U	4193	MDM2	0	0	1	2	pACTBD-B	1	NA	NA	0	0	0
340561	UBE2DNL	4193	MDM2	0	0	1	2	pACTBD-B	1	NA	NA	0	0	0
92912	UBE2Q2	4193	MDM2	0	0	1	2	pACTBD-B	1	NA	NA	0	0	0
7251	TSG101	4193	MDM2	0	0	1	2	pACTBD-B	1	NA	NA	1	0	0
7319	UBE2A	54941	RNF125	0	0	1	1	pACTBD-B	1	-5.839	0	0	0	0
7320	UBE2B	54941	RNF125	0	0	1	1	pACTBD-B	1	-6.062	0	0	0	0
11065	UBE2C	54941	RNF125	0	0	1	1	pACTBD-B	1	-6.424	0	0	0	0
7321	UBE2D1	54941	RNF125	0	5	1	1	pACTBD-B	1	-9.133	0	0	0	0
7322	UBE2D2	54941	RNF125	0	5	1	1	pACTBD-B	1	-9.919	0	0	0	0
7323	UBE2D3	54941	RNF125	0	4	1	1	pACTBD-B	1	-9.653	0	0	0	1
51619	UBE2D4	54941	RNF125	0	5	1	1	pACTBD-B	1	-9.555	0	0	0	0
7324	UBE2E1	54941	RNF125	0	0	1	1	pACTBD-B	1	-9.669	0	0	0	0
10477	UBE2E3	54941	RNF125	0	0	1	1	pACTBD-B	1	-10.183	0	0	0	0
7326	UBE2G1	54941	RNF125	0	0	1	1	pACTBD-B	1	NA	NA	0	0	0
7327	UBE2G2	54941	RNF125	0	NA	0	0	NA	1	NA	NA	0	0	1
7328	UBE2H	54941	RNF125	0	0	1	1	pACTBD-B	1	-8.413	0	0	0	0
7329	UBE2I	54941	RNF125	0	0	1	2	pACTBD-B	1	-7.264	0	0	0	0
7332	UBE2L3	54941	RNF125	1	5	1	2	pACTBD-B	1	-9.103	0	0	0	0
9246	UBE2L6	54941	RNF125	1	5	1	1	pACTBD-B	1	-8.735	0	0	0	0
9040	UBE2M	54941	RNF125	0	0	1	1	pACTBD-B	1	NA	NA	0	0	0
7334	UBE2N	54941	RNF125	0	4	1	1	pACTBD-B	1	-7.794	0	0	0	0
7335	UBE2V1	54941	RNF125	0	1	1	1	pACTBD-B	1	-3.957	0	0	0	0
7336	UBE2V2	54941	RNF125	0	0	1	1	pACTBD-B	1	-3.957	0	0	0	0
27338	UBE2S	54941	RNF125	0	0	1	1	pACTBD-B	1	NA	NA	0	0	0
997	CDC34	54941	RNF125	0	0	1	1	pACTBD-B	1	-8.962	0	0	0	0
3093	HIP2	54941	RNF125	1	5	1	1	pACTBD-B	1	-6.449	0	0	0	0
54926	UBE2R2	54941	RNF125	0	0	1	1	pACTBD-B	1	-8.562	0	0	0	0
51465	UBE2J1	54941	RNF125	0	0	1	1	pACTBD-B	1	-8.318	0	0	0	0
118424	UBE2J2	54941	RNF125	0	0	1	1	pACTBD-B	1	-8.325	0	0	0	0
55284	UBE2W	54941	RNF125	0	4	1	2	pACTBD-B	0	-11.091	0	0	0	0
7325	UBE2E2	54941	RNF125	0	4	1	1	pACTBD-B	1	-9.259	0	0	0	0
55293	UEVLD	54941	RNF125	0	0	1	2	pACTBD-B	1	NA	NA	0	0	0
65264	UBE2Z	54941	RNF125	0	0	1	2	pACTBD-B	1	NA	NA	0	0	0
64400	AKTIP	54941	RNF125	0	0	1	1	pACTBD-B	1	-4.983	0	0	0	0
63893	UBE2O	54941	RNF125	0	0	1	1	pACTBD-B	1	-4.446	0	0	0	0
55585	UBE2Q1	54941	RNF125	0	0	1	1	pACTBD-B	1	-6.282	0	0	0	0
29089	UBE2T	54941	RNF125	0	0	1	1	pACTBD-B	1	-11.037	0	0	0	0
140739	UBE2F	54941	RNF125	0	0	1	1	pACTBD-B	1	NA	NA	0	0	0
57448	BIRC6	54941	RNF125	0	0	1	1	pACTBD-B	1	-6.686	0	0	0	0
148581	UBE2U	54941	RNF125	0	4	1	1	pACTBD-B	1	NA	NA	0	0	0
340561	UBE2DNL	54941	RNF125	0	0	1	1	pACTBD-B	1	NA	NA	0	0	0
92912	UBE2Q2	54941	RNF125	0	0	1	1	pACTBD-B	1	-6.282	0	0	0	0
7251	TSG101	54941	RNF125	0	0	1	1	pACTBD-B	1	-3.309	0	0	0	0
7319	UBE2A	51444	RNF138	0	0	1	1	pACTBD-B	1	-7.509	0	0	0	1
7320	UBE2B	51444	RNF138	0	0	1	1	pACTBD-B	1	-5.442	0	0	0	0
11065	UBE2C	51444	RNF138	0	0	1	1	pACTBD-B	1	-7.334	0	0	0	0
7321	UBE2D1	51444	RNF138	0	0	1	1	pACTBD-B	1	-9.883	0	0	0	0
7322	UBE2D2	51444	RNF138	0	4	1	1	pACTBD-B	1	-9.639	0	0	0	0
7323	UBE2D3	51444	RNF138	0	0	1	1	pACTBD-B	1	-9.433	0	0	0	1
51619	UBE2D4	51444	RNF138	0	5	1	1	pACTBD-B	1	-9.885	0	0	0	0
7324	UBE2E1	51444	RNF138	0	0	1	1	pACTBD-B	1	-10.819	0	0	0	0
10477	UBE2E3	51444	RNF138	0	0	1	1	pACTBD-B	1	-8.923	0	0	0	0
7326	UBE2G1	51444	RNF138	0	0	1	1	pACTBD-B	1	NA	NA	0	0	1
7327	UBE2G2	51444	RNF138	0	NA	0	0	NA	1	NA	NA	0	0	1
7328	UBE2H	51444	RNF138	0	0	1	1	pACTBD-B	1	-8.873	0	0	0	0
7329	UBE2I	51444	RNF138	0	0	1	2	pACTBD-B	1	-7.414	0	0	0	0
7332	UBE2L3	51444	RNF138	0	0	1	2	pACTBD-B	1	-9.033	0	0	0	0
9246	UBE2L6	51444	RNF138	0	0	1	1	pACTBD-B	1	-9.475	0	0	0	1
9040	UBE2M	51444	RNF138	0	0	1	1	pACTBD-B	1	NA	NA	0	0	1
7334	UBE2N	51444	RNF138	0	0	1	1	pACTBD-B	1	-9.494	0	0	0	0
7335	UBE2V1	51444	RNF138	0	0	1	1	pACTBD-B	1	-3.187	0	0	0	0
7336	UBE2V2	51444	RNF138	0	0	1	1	pACTBD-B	1	-3.187	0	0	0	0
27338	UBE2S	51444	RNF138	0	0	1	1	pACTBD-B	1	NA	NA	0	0	0
997	CDC34	51444	RNF138	0	0	1	1	pACTBD-B	1	-8.562	0	0	0	0
3093	HIP2	51444	RNF138	1	5	1	1	pACTBD-B	1	-9.569	0	0	0	1
54926	UBE2R2	51444	RNF138	0	0	1	1	pACTBD-B	1	-8.392	0	0	0	0
51465	UBE2J1	51444	RNF138	0	0	1	1	pACTBD-B	1	-7.938	0	0	0	0
118424	UBE2J2	51444	RNF138	0	0	1	1	pACTBD-B	1	-9.355	0	0	0	0
55284	UBE2W	51444	RNF138	0	4	1	2	pACTBD-B	0	-11.131	0	0	0	0
7325	UBE2E2	51444	RNF138	0	0	1	1	pACTBD-B	1	-10.889	0	0	0	0
55293	UEVLD	51444	RNF138	0	0	1	2	pACTBD-B	1	NA	NA	0	0	0
65264	UBE2Z	51444	RNF138	0	0	1	2	pACTBD-B	1	NA	NA	0	0	0
64400	AKTIP	51444	RNF138	0	0	1	1	pACTBD-B	1	-6.463	0	0	0	0
63893	UBE2O	51444	RNF138	0	0	1	1	pACTBD-B	1	-4.716	0	0	0	0
55585	UBE2Q1	51444	RNF138	0	0	1	1	pACTBD-B	1	-6.052	0	0	0	0
29089	UBE2T	51444	RNF138	0	0	1	1	pACTBD-B	1	-13.107	0	0	0	0
140739	UBE2F	51444	RNF138	0	0	1	1	pACTBD-B	1	NA	NA	0	0	0
57448	BIRC6	51444	RNF138	0	0	1	1	pACTBD-B	1	-6.196	0	0	0	0
148581	UBE2U	51444	RNF138	0	0	1	1	pACTBD-B	1	NA	NA	0	0	0
340561	UBE2DNL	51444	RNF138	0	0	1	1	pACTBD-B	1	NA	NA	0	0	0
92912	UBE2Q2	51444	RNF138	0	0	1	1	pACTBD-B	1	-6.052	0	0	0	0
7251	TSG101	51444	RNF138	0	0	1	1	pACTBD-B	1	0.9	0	0	0	0
7319	UBE2A	51283	BFAR	0	0	1	1	pACTBD-B	1	-4.699	0	0	0	1
7320	UBE2B	51283	BFAR	0	0	1	1	pACTBD-B	1	-6.032	0	0	0	0
11065	UBE2C	51283	BFAR	0	0	1	1	pACTBD-B	1	-6.594	0	0	0	0
7321	UBE2D1	51283	BFAR	1	4	1	1	pACTBD-B	1	-10.263	0	0	0	0
7322	UBE2D2	51283	BFAR	1	4	1	1	pACTBD-B	1	-10.019	0	0	0	0
7323	UBE2D3	51283	BFAR	1	4	1	1	pACTBD-B	1	-8.963	0	0	0	1
51619	UBE2D4	51283	BFAR	0	4	1	1	pACTBD-B	1	-10.175	0	0	0	0
7324	UBE2E1	51283	BFAR	0	0	1	1	pACTBD-B	1	-8.629	0	0	0	0
10477	UBE2E3	51283	BFAR	0	0	1	1	pACTBD-B	1	-10.203	0	0	0	0
7326	UBE2G1	51283	BFAR	0	0	1	1	pACTBD-B	1	NA	NA	0	0	0
7327	UBE2G2	51283	BFAR	0	NA	0	0	NA	1	NA	NA	0	0	1
7328	UBE2H	51283	BFAR	0	0	1	1	pACTBD-B	1	-5.583	0	0	0	0
7329	UBE2I	51283	BFAR	0	0	1	2	pACTBD-B	1	-4.824	0	0	0	0
7332	UBE2L3	51283	BFAR	0	0	1	2	pACTBD-B	1	-9.323	0	0	0	0
9246	UBE2L6	51283	BFAR	0	0	1	1	pACTBD-B	1	-9.465	0	0	0	1
9040	UBE2M	51283	BFAR	0	0	1	1	pACTBD-B	1	NA	NA	0	0	0
7334	UBE2N	51283	BFAR	1	0	1	1	pACTBD-B	1	-6.264	0	0	0	0
7335	UBE2V1	51283	BFAR	0	0	1	1	pACTBD-B	1	-0.557	1	0	0	0
7336	UBE2V2	51283	BFAR	0	0	1	1	pACTBD-B	1	-0.557	1	0	0	0
27338	UBE2S	51283	BFAR	0	0	1	1	pACTBD-B	1	NA	NA	0	0	0
997	CDC34	51283	BFAR	0	0	1	1	pACTBD-B	1	-7.852	1	0	0	0
3093	HIP2	51283	BFAR	0	5	1	1	pACTBD-B	1	-7.389	0	0	0	1
54926	UBE2R2	51283	BFAR	0	0	1	1	pACTBD-B	1	-7.132	0	0	0	0
51465	UBE2J1	51283	BFAR	0	0	1	1	pACTBD-B	1	-3.668	0	0	0	0
118424	UBE2J2	51283	BFAR	0	0	1	1	pACTBD-B	1	-8.745	0	0	0	0
55284	UBE2W	51283	BFAR	1	4	1	2	pACTBD-B	1	-10.931	0	0	0	0
7325	UBE2E2	51283	BFAR	0	0	1	1	pACTBD-B	1	-10.719	0	0	0	0
55293	UEVLD	51283	BFAR	0	0	1	2	pACTBD-B	1	NA	NA	0	0	0
65264	UBE2Z	51283	BFAR	0	0	1	2	pACTBD-B	1	NA	NA	0	0	0
64400	AKTIP	51283	BFAR	0	0	1	1	pACTBD-B	1	-6.873	0	0	0	0
63893	UBE2O	51283	BFAR	0	0	1	1	pACTBD-B	1	-5.266	1	0	0	0
55585	UBE2Q1	51283	BFAR	0	0	1	1	pACTBD-B	1	-5.762	0	0	0	0
29089	UBE2T	51283	BFAR	0	0	1	1	pACTBD-B	1	-10.667	0	0	0	0
140739	UBE2F	51283	BFAR	0	0	1	1	pACTBD-B	1	NA	NA	0	0	0
57448	BIRC6	51283	BFAR	0	0	1	1	pACTBD-B	1	-4.756	0	0	0	0
148581	UBE2U	51283	BFAR	0	0	1	1	pACTBD-B	1	NA	NA	0	0	0
340561	UBE2DNL	51283	BFAR	0	0	1	1	pACTBD-B	1	NA	NA	0	0	0
92912	UBE2Q2	51283	BFAR	0	0	1	1	pACTBD-B	1	-5.762	0	0	0	0
7251	TSG101	51283	BFAR	0	0	1	1	pACTBD-B	1	3.6	1	0	0	0
7319	UBE2A	11237	RNF24	0	0	1	1	pACTBD-B	1	-3.019	0	0	0	0
7320	UBE2B	11237	RNF24	0	0	1	1	pACTBD-B	1	-1.722	1	0	0	0
11065	UBE2C	11237	RNF24	0	0	1	1	pACTBD-B	1	-3.014	1	0	0	0
7321	UBE2D1	11237	RNF24	0	0	1	1	pACTBD-B	1	-7.283	0	0	0	0
7322	UBE2D2	11237	RNF24	0	0	1	1	pACTBD-B	1	-8.759	0	0	0	0
7323	UBE2D3	11237	RNF24	0	0	1	1	pACTBD-B	1	-9.953	0	0	0	0
51619	UBE2D4	11237	RNF24	0	0	1	1	pACTBD-B	1	-9.105	0	0	0	0
7324	UBE2E1	11237	RNF24	0	0	1	1	pACTBD-B	1	-7.669	0	0	0	0
10477	UBE2E3	11237	RNF24	0	0	1	1	pACTBD-B	1	-6.923	0	0	0	0
7326	UBE2G1	11237	RNF24	0	0	1	1	pACTBD-B	1	NA	NA	0	0	0
7327	UBE2G2	11237	RNF24	0	NA	0	0	NA	1	NA	NA	0	0	0
7328	UBE2H	11237	RNF24	0	0	1	1	pACTBD-B	1	-8.083	0	0	0	0
7329	UBE2I	11237	RNF24	0	0	1	2	pACTBD-B	1	-2.014	1	0	0	0
7332	UBE2L3	11237	RNF24	0	0	1	2	pACTBD-B	1	-9.143	0	0	0	0
9246	UBE2L6	11237	RNF24	0	0	1	1	pACTBD-B	1	-8.585	0	0	0	0
9040	UBE2M	11237	RNF24	0	0	1	1	pACTBD-B	1	NA	NA	0	0	0
7334	UBE2N	11237	RNF24	0	0	1	1	pACTBD-B	1	-6.744	1	0	0	0
7335	UBE2V1	11237	RNF24	0	0	1	1	pACTBD-B	1	0.032	1	0	0	0
7336	UBE2V2	11237	RNF24	0	0	1	1	pACTBD-B	1	0.032	1	0	0	0
27338	UBE2S	11237	RNF24	0	0	1	1	pACTBD-B	1	NA	NA	0	0	0
997	CDC34	11237	RNF24	0	0	1	1	pACTBD-B	1	-1.432	1	0	0	0
3093	HIP2	11237	RNF24	0	0	1	1	pACTBD-B	1	-7.569	0	0	0	0
54926	UBE2R2	11237	RNF24	0	0	1	1	pACTBD-B	1	-2.052	1	0	0	0
51465	UBE2J1	11237	RNF24	0	0	1	1	pACTBD-B	1	-4.958	1	0	0	0
118424	UBE2J2	11237	RNF24	0	0	1	1	pACTBD-B	1	-7.115	0	0	0	0
55284	UBE2W	11237	RNF24	0	0	1	2	pACTBD-B	1	-8.181	0	0	0	0
7325	UBE2E2	11237	RNF24	0	0	1	1	pACTBD-B	1	-7.389	0	0	0	0
55293	UEVLD	11237	RNF24	0	0	1	2	pACTBD-B	1	NA	NA	0	0	0
65264	UBE2Z	11237	RNF24	0	0	1	2	pACTBD-B	1	NA	NA	0	0	0
64400	AKTIP	11237	RNF24	0	0	1	1	pACTBD-B	1	-0.473	1	0	0	0
63893	UBE2O	11237	RNF24	0	0	1	1	pACTBD-B	1	-0.386	1	0	0	0
55585	UBE2Q1	11237	RNF24	0	0	1	1	pACTBD-B	1	-4.552	0	0	0	0
29089	UBE2T	11237	RNF24	0	0	1	1	pACTBD-B	1	-8.437	0	0	0	0
140739	UBE2F	11237	RNF24	0	0	1	1	pACTBD-B	1	NA	NA	0	0	0
57448	BIRC6	11237	RNF24	0	0	1	1	pACTBD-B	1	-2.706	1	0	0	0
148581	UBE2U	11237	RNF24	0	0	1	1	pACTBD-B	1	NA	NA	0	0	0
340561	UBE2DNL	11237	RNF24	0	0	1	1	pACTBD-B	1	NA	NA	0	0	0
92912	UBE2Q2	11237	RNF24	0	0	1	1	pACTBD-B	1	-4.552	0	0	0	0
7251	TSG101	11237	RNF24	0	0	1	1	pACTBD-B	1	4.38	1	0	0	0
7319	UBE2A	10739	RFPL2	0	0	1	1	pACTBD-B	1	NA	NA	0	0	0
7320	UBE2B	10739	RFPL2	0	0	1	1	pACTBD-B	1	NA	NA	0	0	0
11065	UBE2C	10739	RFPL2	0	0	1	1	pACTBD-B	1	NA	NA	0	0	0
7321	UBE2D1	10739	RFPL2	0	0	1	1	pACTBD-B	1	NA	NA	0	0	0
7322	UBE2D2	10739	RFPL2	0	0	1	1	pACTBD-B	1	NA	NA	0	0	0
7323	UBE2D3	10739	RFPL2	0	0	1	1	pACTBD-B	1	NA	NA	0	0	0
51619	UBE2D4	10739	RFPL2	0	0	1	1	pACTBD-B	1	NA	NA	0	0	0
7324	UBE2E1	10739	RFPL2	0	0	1	1	pACTBD-B	1	NA	NA	0	0	0
10477	UBE2E3	10739	RFPL2	0	0	1	1	pACTBD-B	1	NA	NA	0	0	0
7326	UBE2G1	10739	RFPL2	0	0	1	1	pACTBD-B	1	NA	NA	0	0	0
7327	UBE2G2	10739	RFPL2	0	NA	0	0	NA	1	NA	NA	0	0	0
7328	UBE2H	10739	RFPL2	0	0	1	1	pACTBD-B	1	NA	NA	0	0	0
7329	UBE2I	10739	RFPL2	0	0	1	2	pACTBD-B	1	NA	NA	0	0	0
7332	UBE2L3	10739	RFPL2	0	0	1	2	pACTBD-B	1	NA	NA	0	0	0
9246	UBE2L6	10739	RFPL2	0	0	1	1	pACTBD-B	1	NA	NA	0	0	0
9040	UBE2M	10739	RFPL2	0	0	1	1	pACTBD-B	1	NA	NA	0	0	0
7334	UBE2N	10739	RFPL2	0	0	1	1	pACTBD-B	1	NA	NA	0	0	0
7335	UBE2V1	10739	RFPL2	0	0	1	1	pACTBD-B	1	NA	NA	0	0	0
7336	UBE2V2	10739	RFPL2	0	0	1	1	pACTBD-B	1	NA	NA	0	0	0
27338	UBE2S	10739	RFPL2	0	0	1	1	pACTBD-B	1	NA	NA	0	0	0
997	CDC34	10739	RFPL2	0	0	1	1	pACTBD-B	1	NA	NA	0	0	0
3093	HIP2	10739	RFPL2	0	0	1	1	pACTBD-B	1	NA	NA	0	0	0
54926	UBE2R2	10739	RFPL2	0	0	1	1	pACTBD-B	1	NA	NA	0	0	0
51465	UBE2J1	10739	RFPL2	0	0	1	1	pACTBD-B	1	NA	NA	0	0	0
118424	UBE2J2	10739	RFPL2	0	0	1	1	pACTBD-B	1	NA	NA	0	0	0
55284	UBE2W	10739	RFPL2	0	0	1	2	pACTBD-B	1	NA	NA	0	0	0
7325	UBE2E2	10739	RFPL2	0	0	1	1	pACTBD-B	1	NA	NA	0	0	0
55293	UEVLD	10739	RFPL2	0	0	1	2	pACTBD-B	1	NA	NA	0	0	0
65264	UBE2Z	10739	RFPL2	0	0	1	2	pACTBD-B	1	NA	NA	0	0	0
64400	AKTIP	10739	RFPL2	0	0	1	1	pACTBD-B	1	NA	NA	0	0	0
63893	UBE2O	10739	RFPL2	0	0	1	1	pACTBD-B	1	NA	NA	0	0	0
55585	UBE2Q1	10739	RFPL2	0	0	1	1	pACTBD-B	1	NA	NA	0	0	0
29089	UBE2T	10739	RFPL2	0	0	1	1	pACTBD-B	1	NA	NA	0	0	0
140739	UBE2F	10739	RFPL2	0	0	1	1	pACTBD-B	1	NA	NA	0	0	0
57448	BIRC6	10739	RFPL2	0	0	1	1	pACTBD-B	1	NA	NA	0	0	0
148581	UBE2U	10739	RFPL2	0	0	1	1	pACTBD-B	1	NA	NA	0	0	0
340561	UBE2DNL	10739	RFPL2	0	0	1	1	pACTBD-B	1	NA	NA	0	0	0
92912	UBE2Q2	10739	RFPL2	0	0	1	1	pACTBD-B	1	NA	NA	0	0	0
7251	TSG101	10739	RFPL2	0	0	1	1	pACTBD-B	1	NA	NA	0	0	0
7319	UBE2A	10738	RFPL3	0	0	1	1	pACTBD-B	1	NA	NA	0	0	0
7320	UBE2B	10738	RFPL3	0	0	1	1	pACTBD-B	1	NA	NA	0	0	0
11065	UBE2C	10738	RFPL3	0	0	1	1	pACTBD-B	1	NA	NA	0	0	0
7321	UBE2D1	10738	RFPL3	0	0	1	1	pACTBD-B	1	NA	NA	0	0	0
7322	UBE2D2	10738	RFPL3	0	0	1	1	pACTBD-B	1	NA	NA	0	0	0
7323	UBE2D3	10738	RFPL3	0	0	1	1	pACTBD-B	1	NA	NA	0	0	0
51619	UBE2D4	10738	RFPL3	0	0	1	1	pACTBD-B	1	NA	NA	0	0	0
7324	UBE2E1	10738	RFPL3	0	0	1	1	pACTBD-B	1	NA	NA	0	0	0
10477	UBE2E3	10738	RFPL3	0	0	1	1	pACTBD-B	1	NA	NA	0	0	0
7326	UBE2G1	10738	RFPL3	0	0	1	1	pACTBD-B	1	NA	NA	0	0	0
7327	UBE2G2	10738	RFPL3	0	NA	0	0	NA	1	NA	NA	0	0	0
7328	UBE2H	10738	RFPL3	0	0	1	1	pACTBD-B	1	NA	NA	0	0	0
7329	UBE2I	10738	RFPL3	0	0	1	2	pACTBD-B	1	NA	NA	0	0	0
7332	UBE2L3	10738	RFPL3	0	0	1	2	pACTBD-B	1	NA	NA	0	0	0
9246	UBE2L6	10738	RFPL3	0	0	1	1	pACTBD-B	1	NA	NA	0	0	0
9040	UBE2M	10738	RFPL3	0	0	1	1	pACTBD-B	1	NA	NA	0	0	0
7334	UBE2N	10738	RFPL3	0	0	1	1	pACTBD-B	1	NA	NA	0	0	0
7335	UBE2V1	10738	RFPL3	0	0	1	1	pACTBD-B	1	NA	NA	0	0	0
7336	UBE2V2	10738	RFPL3	0	0	1	1	pACTBD-B	1	NA	NA	0	0	0
27338	UBE2S	10738	RFPL3	0	0	1	1	pACTBD-B	1	NA	NA	0	0	0
997	CDC34	10738	RFPL3	0	0	1	1	pACTBD-B	1	NA	NA	0	0	0
3093	HIP2	10738	RFPL3	0	0	1	1	pACTBD-B	1	NA	NA	0	0	0
54926	UBE2R2	10738	RFPL3	0	0	1	1	pACTBD-B	1	NA	NA	0	0	0
51465	UBE2J1	10738	RFPL3	0	0	1	1	pACTBD-B	1	NA	NA	0	0	0
118424	UBE2J2	10738	RFPL3	0	0	1	1	pACTBD-B	1	NA	NA	0	0	0
55284	UBE2W	10738	RFPL3	0	0	1	2	pACTBD-B	1	NA	NA	0	0	0
7325	UBE2E2	10738	RFPL3	0	0	1	1	pACTBD-B	1	NA	NA	0	0	0
55293	UEVLD	10738	RFPL3	0	0	1	2	pACTBD-B	1	NA	NA	0	0	0
65264	UBE2Z	10738	RFPL3	0	0	1	2	pACTBD-B	1	NA	NA	0	0	0
64400	AKTIP	10738	RFPL3	0	0	1	1	pACTBD-B	1	NA	NA	0	0	0
63893	UBE2O	10738	RFPL3	0	0	1	1	pACTBD-B	1	NA	NA	0	0	0
55585	UBE2Q1	10738	RFPL3	0	0	1	1	pACTBD-B	1	NA	NA	0	0	0
29089	UBE2T	10738	RFPL3	0	0	1	1	pACTBD-B	1	NA	NA	0	0	0
140739	UBE2F	10738	RFPL3	0	0	1	1	pACTBD-B	1	NA	NA	0	0	0
57448	BIRC6	10738	RFPL3	0	0	1	1	pACTBD-B	1	NA	NA	0	0	0
148581	UBE2U	10738	RFPL3	0	0	1	1	pACTBD-B	1	NA	NA	0	0	0
340561	UBE2DNL	10738	RFPL3	0	0	1	1	pACTBD-B	1	NA	NA	0	0	0
92912	UBE2Q2	10738	RFPL3	0	0	1	1	pACTBD-B	1	NA	NA	0	0	0
7251	TSG101	10738	RFPL3	0	0	1	1	pACTBD-B	1	NA	NA	0	0	0
7319	UBE2A	25898	RCHY1	0	0	1	1	pACTBD-B	1	-8.249	0	0	0	1
7320	UBE2B	25898	RCHY1	0	0	1	1	pACTBD-B	1	-7.682	0	0	0	0
11065	UBE2C	25898	RCHY1	0	0	1	1	pACTBD-B	1	-8.344	0	0	0	0
7321	UBE2D1	25898	RCHY1	0	0	1	1	pACTBD-B	1	-9.613	0	0	0	0
7322	UBE2D2	25898	RCHY1	0	0	1	1	pACTBD-B	1	-10.639	0	0	0	0
7323	UBE2D3	25898	RCHY1	0	0	1	1	pACTBD-B	1	-10.483	0	0	0	1
51619	UBE2D4	25898	RCHY1	0	4	1	1	pACTBD-B	1	-9.275	0	0	0	0
7324	UBE2E1	25898	RCHY1	0	0	1	1	pACTBD-B	1	-10.209	0	0	0	0
10477	UBE2E3	25898	RCHY1	0	0	1	1	pACTBD-B	1	-10.813	0	0	0	0
7326	UBE2G1	25898	RCHY1	0	0	1	1	pACTBD-B	1	NA	NA	0	0	1
7327	UBE2G2	25898	RCHY1	0	NA	0	0	NA	1	NA	NA	0	0	1
7328	UBE2H	25898	RCHY1	0	0	1	1	pACTBD-B	1	-10.373	0	0	0	0
7329	UBE2I	25898	RCHY1	0	0	1	2	pACTBD-B	1	-6.244	0	0	0	0
7332	UBE2L3	25898	RCHY1	0	0	1	2	pACTBD-B	1	-11.093	0	0	0	0
9246	UBE2L6	25898	RCHY1	0	0	1	1	pACTBD-B	1	-10.895	0	0	0	1
9040	UBE2M	25898	RCHY1	0	0	1	1	pACTBD-B	1	NA	NA	0	0	0
7334	UBE2N	25898	RCHY1	0	0	1	1	pACTBD-B	1	-6.754	0	0	0	1
7335	UBE2V1	25898	RCHY1	0	0	1	1	pACTBD-B	1	-3.477	0	0	0	0
7336	UBE2V2	25898	RCHY1	0	0	1	1	pACTBD-B	1	-3.477	0	0	0	0
27338	UBE2S	25898	RCHY1	0	0	1	1	pACTBD-B	1	NA	NA	0	0	0
997	CDC34	25898	RCHY1	0	0	1	1	pACTBD-B	1	-10.632	0	0	0	0
3093	HIP2	25898	RCHY1	0	0	1	1	pACTBD-B	1	-6.989	0	0	0	1
54926	UBE2R2	25898	RCHY1	0	0	1	1	pACTBD-B	1	-10.592	0	0	0	0
51465	UBE2J1	25898	RCHY1	0	0	1	1	pACTBD-B	1	-6.838	0	0	0	0
118424	UBE2J2	25898	RCHY1	0	0	1	1	pACTBD-B	1	-10.975	0	0	0	0
55284	UBE2W	25898	RCHY1	0	0	1	2	pACTBD-B	1	-10.661	0	0	0	0
7325	UBE2E2	25898	RCHY1	0	0	1	1	pACTBD-B	1	-10.059	0	0	0	0
55293	UEVLD	25898	RCHY1	0	0	1	2	pACTBD-B	1	NA	NA	0	0	0
65264	UBE2Z	25898	RCHY1	0	0	1	2	pACTBD-B	1	NA	NA	0	0	0
64400	AKTIP	25898	RCHY1	0	0	1	1	pACTBD-B	1	-5.973	0	0	0	0
63893	UBE2O	25898	RCHY1	0	0	1	1	pACTBD-B	1	-5.286	0	0	0	0
55585	UBE2Q1	25898	RCHY1	0	0	1	1	pACTBD-B	1	-6.502	0	0	0	0
29089	UBE2T	25898	RCHY1	0	0	1	1	pACTBD-B	1	-11.317	0	0	0	0
140739	UBE2F	25898	RCHY1	0	0	1	1	pACTBD-B	1	NA	NA	0	0	0
57448	BIRC6	25898	RCHY1	0	0	1	1	pACTBD-B	1	-7.886	0	0	0	0
148581	UBE2U	25898	RCHY1	0	0	1	1	pACTBD-B	1	NA	NA	0	0	0
340561	UBE2DNL	25898	RCHY1	0	0	1	1	pACTBD-B	1	NA	NA	0	0	0
92912	UBE2Q2	25898	RCHY1	0	0	1	1	pACTBD-B	1	-6.502	0	0	0	0
7251	TSG101	25898	RCHY1	0	0	1	1	pACTBD-B	1	-1.639	1	0	0	0
7319	UBE2A	10668	CGRRF1	0	0	1	1	pACTBD-B	1	-6.109	1	0	0	0
7320	UBE2B	10668	CGRRF1	0	0	1	1	pACTBD-B	1	-6.432	1	0	0	0
11065	UBE2C	10668	CGRRF1	0	0	1	1	pACTBD-B	1	-8.064	0	0	0	0
7321	UBE2D1	10668	CGRRF1	0	0	1	1	pACTBD-B	1	-11.313	0	0	0	0
7322	UBE2D2	10668	CGRRF1	0	0	1	1	pACTBD-B	1	-11.799	0	0	0	0
7323	UBE2D3	10668	CGRRF1	0	0	1	1	pACTBD-B	1	-12.073	0	0	0	0
51619	UBE2D4	10668	CGRRF1	0	0	1	1	pACTBD-B	1	-13.295	0	0	0	0
7324	UBE2E1	10668	CGRRF1	0	0	1	1	pACTBD-B	1	-12.759	0	0	0	0
10477	UBE2E3	10668	CGRRF1	0	0	1	1	pACTBD-B	1	-13.413	0	0	0	0
7326	UBE2G1	10668	CGRRF1	0	0	1	1	pACTBD-B	1	NA	NA	0	0	0
7327	UBE2G2	10668	CGRRF1	0	NA	0	0	NA	1	NA	NA	0	0	0
7328	UBE2H	10668	CGRRF1	0	0	1	1	pACTBD-B	1	-7.653	0	0	0	0
7329	UBE2I	10668	CGRRF1	0	0	1	2	pACTBD-B	1	-7.354	1	0	0	0
7332	UBE2L3	10668	CGRRF1	0	0	1	2	pACTBD-B	1	-10.823	0	0	0	0
9246	UBE2L6	10668	CGRRF1	0	0	1	1	pACTBD-B	1	-10.885	0	0	0	0
9040	UBE2M	10668	CGRRF1	0	0	1	1	pACTBD-B	1	NA	NA	0	0	0
7334	UBE2N	10668	CGRRF1	0	0	1	1	pACTBD-B	1	-7.154	1	0	0	0
7335	UBE2V1	10668	CGRRF1	0	0	1	1	pACTBD-B	1	-6.927	1	0	0	0
7336	UBE2V2	10668	CGRRF1	0	0	1	1	pACTBD-B	1	-6.927	1	0	0	0
27338	UBE2S	10668	CGRRF1	0	0	1	1	pACTBD-B	1	NA	NA	0	0	0
997	CDC34	10668	CGRRF1	0	0	1	1	pACTBD-B	1	-3.282	1	0	0	0
3093	HIP2	10668	CGRRF1	0	0	1	1	pACTBD-B	1	-10.319	0	0	0	0
54926	UBE2R2	10668	CGRRF1	0	0	1	1	pACTBD-B	1	-3.882	1	0	0	0
51465	UBE2J1	10668	CGRRF1	0	0	1	1	pACTBD-B	1	-8.068	1	0	0	0
118424	UBE2J2	10668	CGRRF1	0	0	1	1	pACTBD-B	1	-10.135	0	0	0	0
55284	UBE2W	10668	CGRRF1	0	0	1	2	pACTBD-B	1	-10.921	0	0	0	0
7325	UBE2E2	10668	CGRRF1	0	0	1	1	pACTBD-B	1	-12.589	0	0	0	0
55293	UEVLD	10668	CGRRF1	0	0	1	2	pACTBD-B	1	NA	NA	0	0	0
65264	UBE2Z	10668	CGRRF1	0	0	1	2	pACTBD-B	1	NA	NA	0	0	0
64400	AKTIP	10668	CGRRF1	0	0	1	1	pACTBD-B	1	-6.403	1	0	0	0
63893	UBE2O	10668	CGRRF1	0	0	1	1	pACTBD-B	1	-3.046	1	0	0	0
55585	UBE2Q1	10668	CGRRF1	0	0	1	1	pACTBD-B	1	-8.662	0	0	0	0
29089	UBE2T	10668	CGRRF1	0	0	1	1	pACTBD-B	1	-8.217	0	0	0	0
140739	UBE2F	10668	CGRRF1	0	0	1	1	pACTBD-B	1	NA	NA	0	0	0
57448	BIRC6	10668	CGRRF1	0	0	1	1	pACTBD-B	1	-7.026	1	0	0	0
148581	UBE2U	10668	CGRRF1	0	0	1	1	pACTBD-B	1	NA	NA	0	0	0
340561	UBE2DNL	10668	CGRRF1	0	0	1	1	pACTBD-B	1	NA	NA	0	0	0
92912	UBE2Q2	10668	CGRRF1	0	0	1	1	pACTBD-B	1	-8.662	0	0	0	0
7251	TSG101	10668	CGRRF1	0	0	1	1	pACTBD-B	1	3.84	1	0	0	0
7319	UBE2A	55658	RNF126	0	0	1	1	pACTBD-B	1	NA	NA	0	0	1
7320	UBE2B	55658	RNF126	0	0	1	1	pACTBD-B	1	NA	NA	0	0	0
11065	UBE2C	55658	RNF126	0	0	1	1	pACTBD-B	1	NA	NA	0	0	0
7321	UBE2D1	55658	RNF126	1	5	1	1	pACTBD-B	1	NA	NA	1	0	0
7322	UBE2D2	55658	RNF126	1	5	1	1	pACTBD-B	1	NA	NA	0	0	0
7323	UBE2D3	55658	RNF126	1	5	1	1	pACTBD-B	1	NA	NA	1	0	0
51619	UBE2D4	55658	RNF126	1	5	1	1	pACTBD-B	1	NA	NA	1	0	0
7324	UBE2E1	55658	RNF126	0	0	1	1	pACTBD-B	1	NA	NA	0	0	0
10477	UBE2E3	55658	RNF126	0	0	1	1	pACTBD-B	1	NA	NA	0	0	0
7326	UBE2G1	55658	RNF126	0	0	1	1	pACTBD-B	1	NA	NA	0	0	1
7327	UBE2G2	55658	RNF126	0	NA	0	0	NA	1	NA	NA	0	0	1
7328	UBE2H	55658	RNF126	0	0	1	1	pACTBD-B	1	NA	NA	0	0	0
7329	UBE2I	55658	RNF126	0	0	1	2	pACTBD-B	1	NA	NA	0	0	0
7332	UBE2L3	55658	RNF126	0	0	1	2	pACTBD-B	1	NA	NA	0	0	0
9246	UBE2L6	55658	RNF126	0	0	1	1	pACTBD-B	1	NA	NA	0	0	1
9040	UBE2M	55658	RNF126	0	0	1	1	pACTBD-B	1	NA	NA	0	0	1
7334	UBE2N	55658	RNF126	0	0	1	1	pACTBD-B	1	NA	NA	0	0	1
7335	UBE2V1	55658	RNF126	0	1	1	1	pACTBD-B	1	NA	NA	0	0	0
7336	UBE2V2	55658	RNF126	0	0	1	1	pACTBD-B	1	NA	NA	0	0	0
27338	UBE2S	55658	RNF126	0	0	1	1	pACTBD-B	1	NA	NA	0	0	0
997	CDC34	55658	RNF126	0	0	1	1	pACTBD-B	1	NA	NA	0	0	0
3093	HIP2	55658	RNF126	0	0	1	1	pACTBD-B	1	NA	NA	0	0	1
54926	UBE2R2	55658	RNF126	0	0	1	1	pACTBD-B	1	NA	NA	0	0	0
51465	UBE2J1	55658	RNF126	0	0	1	1	pACTBD-B	1	NA	NA	0	0	0
118424	UBE2J2	55658	RNF126	0	0	1	1	pACTBD-B	1	NA	NA	0	0	0
55284	UBE2W	55658	RNF126	0	0	1	2	pACTBD-B	1	NA	NA	0	0	0
7325	UBE2E2	55658	RNF126	0	0	1	1	pACTBD-B	1	NA	NA	0	0	0
55293	UEVLD	55658	RNF126	0	0	1	2	pACTBD-B	1	NA	NA	0	0	0
65264	UBE2Z	55658	RNF126	0	0	1	2	pACTBD-B	1	NA	NA	0	0	0
64400	AKTIP	55658	RNF126	0	0	1	1	pACTBD-B	1	NA	NA	0	0	0
63893	UBE2O	55658	RNF126	0	0	1	1	pACTBD-B	1	NA	NA	0	0	0
55585	UBE2Q1	55658	RNF126	0	0	1	1	pACTBD-B	1	NA	NA	0	0	0
29089	UBE2T	55658	RNF126	0	0	1	1	pACTBD-B	1	NA	NA	0	0	0
140739	UBE2F	55658	RNF126	0	0	1	1	pACTBD-B	1	NA	NA	0	0	0
57448	BIRC6	55658	RNF126	0	0	1	1	pACTBD-B	1	NA	NA	0	0	0
148581	UBE2U	55658	RNF126	0	0	1	1	pACTBD-B	1	NA	NA	0	0	0
340561	UBE2DNL	55658	RNF126	0	0	1	1	pACTBD-B	1	NA	NA	0	0	0
92912	UBE2Q2	55658	RNF126	0	0	1	1	pACTBD-B	1	NA	NA	0	0	0
7251	TSG101	55658	RNF126	0	5	1	1	pACTBD-B	1	NA	NA	0	0	0
7319	UBE2A	727800	RNF208	0	0	1	1	pACTBD-B	1	-6.249	0	0	0	0
7320	UBE2B	727800	RNF208	0	0	1	1	pACTBD-B	1	-4.862	0	0	0	0
11065	UBE2C	727800	RNF208	0	0	1	1	pACTBD-B	1	-3.264	0	0	0	0
7321	UBE2D1	727800	RNF208	0	0	1	1	pACTBD-B	1	-7.303	0	0	0	0
7322	UBE2D2	727800	RNF208	0	0	1	1	pACTBD-B	1	-6.659	0	0	0	0
7323	UBE2D3	727800	RNF208	0	0	1	1	pACTBD-B	1	-7.403	0	0	0	0
51619	UBE2D4	727800	RNF208	0	0	1	1	pACTBD-B	1	-8.475	0	0	0	0
7324	UBE2E1	727800	RNF208	0	0	1	1	pACTBD-B	1	-7.629	0	0	0	0
10477	UBE2E3	727800	RNF208	0	0	1	1	pACTBD-B	1	-6.963	0	0	0	0
7326	UBE2G1	727800	RNF208	0	0	1	1	pACTBD-B	1	NA	NA	0	0	0
7327	UBE2G2	727800	RNF208	0	NA	0	0	NA	1	NA	NA	0	0	0
7328	UBE2H	727800	RNF208	0	0	1	1	pACTBD-B	1	-6.953	0	0	0	0
7329	UBE2I	727800	RNF208	0	0	1	2	pACTBD-B	1	-5.174	0	0	0	0
7332	UBE2L3	727800	RNF208	0	0	1	2	pACTBD-B	1	-6.833	0	0	0	0
9246	UBE2L6	727800	RNF208	0	0	1	1	pACTBD-B	1	-6.445	0	0	0	0
9040	UBE2M	727800	RNF208	0	0	1	1	pACTBD-B	1	NA	NA	0	0	0
7334	UBE2N	727800	RNF208	0	0	1	1	pACTBD-B	1	-6.024	0	0	0	0
7335	UBE2V1	727800	RNF208	0	0	1	1	pACTBD-B	1	-2.067	0	0	0	0
7336	UBE2V2	727800	RNF208	0	0	1	1	pACTBD-B	1	-2.067	0	0	0	0
27338	UBE2S	727800	RNF208	0	0	1	1	pACTBD-B	1	NA	NA	0	0	0
997	CDC34	727800	RNF208	0	0	1	1	pACTBD-B	1	-5.472	0	0	0	0
3093	HIP2	727800	RNF208	0	0	1	1	pACTBD-B	1	-7.849	0	0	0	0
54926	UBE2R2	727800	RNF208	0	0	1	1	pACTBD-B	1	-6.062	0	0	0	0
51465	UBE2J1	727800	RNF208	0	0	1	1	pACTBD-B	1	-6.398	0	0	0	0
118424	UBE2J2	727800	RNF208	0	0	1	1	pACTBD-B	1	-7.095	0	0	0	0
55284	UBE2W	727800	RNF208	0	0	1	2	pACTBD-B	1	-10.221	0	0	0	0
7325	UBE2E2	727800	RNF208	0	0	1	1	pACTBD-B	1	-7.029	0	0	0	0
55293	UEVLD	727800	RNF208	0	0	1	2	pACTBD-B	1	NA	NA	0	0	0
65264	UBE2Z	727800	RNF208	0	0	1	2	pACTBD-B	1	NA	NA	0	0	0
64400	AKTIP	727800	RNF208	0	0	1	1	pACTBD-B	1	-4.563	0	0	0	0
63893	UBE2O	727800	RNF208	0	0	1	1	pACTBD-B	1	-3.496	0	0	0	0
55585	UBE2Q1	727800	RNF208	0	0	1	1	pACTBD-B	1	-4.932	0	0	0	0
29089	UBE2T	727800	RNF208	0	0	1	1	pACTBD-B	1	-11.647	0	0	0	0
140739	UBE2F	727800	RNF208	0	0	1	1	pACTBD-B	1	NA	NA	0	0	0
57448	BIRC6	727800	RNF208	0	0	1	1	pACTBD-B	1	-5.856	0	0	0	0
148581	UBE2U	727800	RNF208	0	0	1	1	pACTBD-B	1	NA	NA	0	0	0
340561	UBE2DNL	727800	RNF208	0	0	1	1	pACTBD-B	1	NA	NA	0	0	0
92912	UBE2Q2	727800	RNF208	0	0	1	1	pACTBD-B	1	-4.932	0	0	0	0
7251	TSG101	727800	RNF208	0	0	1	1	pACTBD-B	1	0.61	0	0	0	0
7319	UBE2A	10336	PCGF3	0	0	1	1	pACTBD-B	1	-6.169	0	0	0	1
7320	UBE2B	10336	PCGF3	0	0	1	1	pACTBD-B	1	-4.302	0	0	0	0
11065	UBE2C	10336	PCGF3	1	0	1	1	pACTBD-B	1	-5.784	0	0	0	0
7321	UBE2D1	10336	PCGF3	0	0	1	1	pACTBD-B	1	-8.633	0	0	0	0
7322	UBE2D2	10336	PCGF3	0	0	1	1	pACTBD-B	1	-10.229	0	0	0	0
7323	UBE2D3	10336	PCGF3	0	0	1	1	pACTBD-B	1	-7.333	0	0	0	1
51619	UBE2D4	10336	PCGF3	0	0	1	1	pACTBD-B	1	-8.785	0	0	0	0
7324	UBE2E1	10336	PCGF3	0	0	1	1	pACTBD-B	1	-10.549	0	0	0	0
10477	UBE2E3	10336	PCGF3	0	0	1	1	pACTBD-B	1	-9.193	0	0	0	0
7326	UBE2G1	10336	PCGF3	0	0	1	1	pACTBD-B	1	NA	NA	0	0	0
7327	UBE2G2	10336	PCGF3	0	NA	0	0	NA	1	NA	NA	0	0	1
7328	UBE2H	10336	PCGF3	0	0	1	1	pACTBD-B	1	-7.823	0	0	0	0
7329	UBE2I	10336	PCGF3	0	0	1	2	pACTBD-B	1	-6.854	1	0	0	0
7332	UBE2L3	10336	PCGF3	0	0	1	2	pACTBD-B	1	-9.433	0	0	0	0
9246	UBE2L6	10336	PCGF3	0	0	1	1	pACTBD-B	1	-10.265	0	0	0	0
9040	UBE2M	10336	PCGF3	0	0	1	1	pACTBD-B	1	NA	NA	0	0	0
7334	UBE2N	10336	PCGF3	0	0	1	1	pACTBD-B	1	-8.534	0	0	0	0
7335	UBE2V1	10336	PCGF3	0	0	1	1	pACTBD-B	1	1.242	0	0	0	0
7336	UBE2V2	10336	PCGF3	0	0	1	1	pACTBD-B	1	1.242	0	0	0	0
27338	UBE2S	10336	PCGF3	0	0	1	1	pACTBD-B	1	NA	NA	0	0	0
997	CDC34	10336	PCGF3	0	0	1	1	pACTBD-B	1	-7.812	0	0	0	0
3093	HIP2	10336	PCGF3	0	0	1	1	pACTBD-B	1	-7.779	0	0	0	1
54926	UBE2R2	10336	PCGF3	0	0	1	1	pACTBD-B	1	-7.242	1	0	0	0
51465	UBE2J1	10336	PCGF3	0	0	1	1	pACTBD-B	1	-5.018	0	0	0	0
118424	UBE2J2	10336	PCGF3	0	0	1	1	pACTBD-B	1	-8.965	0	0	0	0
55284	UBE2W	10336	PCGF3	0	0	1	2	pACTBD-B	1	-10.381	0	0	0	0
7325	UBE2E2	10336	PCGF3	0	0	1	1	pACTBD-B	1	-7.869	0	0	0	0
55293	UEVLD	10336	PCGF3	0	0	1	2	pACTBD-B	1	NA	NA	0	0	0
65264	UBE2Z	10336	PCGF3	0	0	1	2	pACTBD-B	1	NA	NA	0	0	0
64400	AKTIP	10336	PCGF3	0	0	1	1	pACTBD-B	1	-3.593	0	0	0	0
63893	UBE2O	10336	PCGF3	0	0	1	1	pACTBD-B	1	-1.306	0	0	0	0
55585	UBE2Q1	10336	PCGF3	0	0	1	1	pACTBD-B	1	-5.992	0	0	0	0
29089	UBE2T	10336	PCGF3	0	0	1	1	pACTBD-B	1	-10.407	0	0	0	0
140739	UBE2F	10336	PCGF3	0	0	1	1	pACTBD-B	1	NA	NA	0	0	0
57448	BIRC6	10336	PCGF3	0	0	1	1	pACTBD-B	1	-6.036	0	0	0	0
148581	UBE2U	10336	PCGF3	0	0	1	1	pACTBD-B	1	NA	NA	0	0	0
340561	UBE2DNL	10336	PCGF3	0	0	1	1	pACTBD-B	1	NA	NA	0	0	0
92912	UBE2Q2	10336	PCGF3	0	0	1	1	pACTBD-B	1	-5.992	0	0	0	0
7251	TSG101	10336	PCGF3	0	0	1	1	pACTBD-B	1	0.23	0	0	0	0
7319	UBE2A	4331	MNAT1	0	0	1	1	pACTBD-B	1	-5.899	0	0	0	0
7320	UBE2B	4331	MNAT1	0	0	1	1	pACTBD-B	1	-7.152	0	0	0	0
11065	UBE2C	4331	MNAT1	0	0	1	1	pACTBD-B	1	-7.324	0	0	0	0
7321	UBE2D1	4331	MNAT1	0	0	1	1	pACTBD-B	1	-6.713	0	0	0	0
7322	UBE2D2	4331	MNAT1	0	0	1	1	pACTBD-B	1	-11.089	0	0	0	0
7323	UBE2D3	4331	MNAT1	0	0	1	1	pACTBD-B	1	-9.903	0	0	0	0
51619	UBE2D4	4331	MNAT1	0	0	1	1	pACTBD-B	1	-9.315	0	0	0	0
7324	UBE2E1	4331	MNAT1	0	0	1	1	pACTBD-B	1	-9.529	0	0	0	0
10477	UBE2E3	4331	MNAT1	0	0	1	1	pACTBD-B	1	-10.573	0	0	0	0
7326	UBE2G1	4331	MNAT1	0	0	1	1	pACTBD-B	1	NA	NA	0	0	1
7327	UBE2G2	4331	MNAT1	0	NA	0	0	NA	1	NA	NA	0	0	0
7328	UBE2H	4331	MNAT1	0	0	1	1	pACTBD-B	1	-7.483	1	0	0	0
7329	UBE2I	4331	MNAT1	0	0	1	2	pACTBD-B	1	-3.124	0	0	0	0
7332	UBE2L3	4331	MNAT1	0	0	1	2	pACTBD-B	1	-7.723	0	0	0	0
9246	UBE2L6	4331	MNAT1	0	0	1	1	pACTBD-B	1	-5.185	0	0	0	0
9040	UBE2M	4331	MNAT1	0	0	1	1	pACTBD-B	1	NA	NA	0	0	0
7334	UBE2N	4331	MNAT1	0	0	1	1	pACTBD-B	1	-7.444	0	0	0	0
7335	UBE2V1	4331	MNAT1	0	0	1	1	pACTBD-B	1	-0.897	0	0	0	0
7336	UBE2V2	4331	MNAT1	0	0	1	1	pACTBD-B	1	-0.897	0	0	0	0
27338	UBE2S	4331	MNAT1	0	0	1	1	pACTBD-B	1	NA	NA	0	0	0
997	CDC34	4331	MNAT1	0	0	1	1	pACTBD-B	1	-6.772	0	0	0	0
3093	HIP2	4331	MNAT1	0	0	1	1	pACTBD-B	1	-7.999	0	0	0	0
54926	UBE2R2	4331	MNAT1	0	0	1	1	pACTBD-B	1	-5.082	0	0	0	0
51465	UBE2J1	4331	MNAT1	0	0	1	1	pACTBD-B	1	-6.628	0	0	0	0
118424	UBE2J2	4331	MNAT1	0	0	1	1	pACTBD-B	1	-6.655	0	0	0	0
55284	UBE2W	4331	MNAT1	0	0	1	2	pACTBD-B	1	-9.891	0	0	0	0
7325	UBE2E2	4331	MNAT1	0	0	1	1	pACTBD-B	1	-11.039	0	0	0	0
55293	UEVLD	4331	MNAT1	0	0	1	2	pACTBD-B	1	NA	NA	0	0	0
65264	UBE2Z	4331	MNAT1	0	0	1	2	pACTBD-B	1	NA	NA	0	0	0
64400	AKTIP	4331	MNAT1	0	0	1	1	pACTBD-B	1	-6.513	1	0	0	0
63893	UBE2O	4331	MNAT1	0	0	1	1	pACTBD-B	1	-6.376	0	0	0	0
55585	UBE2Q1	4331	MNAT1	0	0	1	1	pACTBD-B	1	-6.422	0	0	0	0
29089	UBE2T	4331	MNAT1	0	0	1	1	pACTBD-B	1	-10.537	0	0	0	0
140739	UBE2F	4331	MNAT1	0	0	1	1	pACTBD-B	1	NA	NA	0	0	0
57448	BIRC6	4331	MNAT1	0	0	1	1	pACTBD-B	1	-6.366	0	0	0	0
148581	UBE2U	4331	MNAT1	0	0	1	1	pACTBD-B	1	NA	NA	0	0	0
340561	UBE2DNL	4331	MNAT1	0	0	1	1	pACTBD-B	1	NA	NA	0	0	0
92912	UBE2Q2	4331	MNAT1	0	0	1	1	pACTBD-B	1	-6.422	0	0	0	0
7251	TSG101	4331	MNAT1	0	0	1	1	pACTBD-B	1	6.24	1	0	0	0
7319	UBE2A	6047	RNF4	0	0	1	1	pACTBD-B	1	-7.599	0	0	0	1
7320	UBE2B	6047	RNF4	0	0	1	1	pACTBD-B	1	-5.842	0	0	0	0
11065	UBE2C	6047	RNF4	0	0	1	1	pACTBD-B	1	-10.334	0	0	0	1
7321	UBE2D1	6047	RNF4	0	4	1	1	pACTBD-B	1	-10.513	0	0	0	0
7322	UBE2D2	6047	RNF4	0	4	1	1	pACTBD-B	1	-10.569	0	0	0	0
7323	UBE2D3	6047	RNF4	0	4	1	1	pACTBD-B	1	-10.413	0	0	1	1
51619	UBE2D4	6047	RNF4	0	4	1	1	pACTBD-B	1	-10.735	0	0	0	0
7324	UBE2E1	6047	RNF4	0	4	1	1	pACTBD-B	1	-10.559	0	0	1	0
10477	UBE2E3	6047	RNF4	0	4	1	1	pACTBD-B	1	-9.263	0	0	1	1
7326	UBE2G1	6047	RNF4	0	0	1	1	pACTBD-B	1	NA	NA	0	0	1
7327	UBE2G2	6047	RNF4	0	NA	0	0	NA	1	NA	NA	0	0	1
7328	UBE2H	6047	RNF4	0	4	1	1	pACTBD-B	1	-8.323	0	0	0	0
7329	UBE2I	6047	RNF4	0	4	1	2	pACTBD-B	1	-7.584	0	0	0	0
7332	UBE2L3	6047	RNF4	0	0	1	2	pACTBD-B	1	-9.593	0	0	0	0
9246	UBE2L6	6047	RNF4	0	0	1	1	pACTBD-B	1	-9.845	0	0	0	1
9040	UBE2M	6047	RNF4	0	0	1	1	pACTBD-B	1	NA	NA	0	0	1
7334	UBE2N	6047	RNF4	0	0	1	1	pACTBD-B	1	-10.354	0	0	0	1
7335	UBE2V1	6047	RNF4	0	0	1	1	pACTBD-B	1	-5.347	0	0	0	0
7336	UBE2V2	6047	RNF4	0	0	1	1	pACTBD-B	1	-5.347	0	0	0	0
27338	UBE2S	6047	RNF4	0	0	1	1	pACTBD-B	1	NA	NA	0	0	0
997	CDC34	6047	RNF4	0	0	1	1	pACTBD-B	1	-9.432	0	0	0	0
3093	HIP2	6047	RNF4	0	4	1	1	pACTBD-B	1	-7.999	0	0	0	1
54926	UBE2R2	6047	RNF4	0	0	1	1	pACTBD-B	1	-10.342	0	0	0	0
51465	UBE2J1	6047	RNF4	0	0	1	1	pACTBD-B	1	-9.278	0	0	0	1
118424	UBE2J2	6047	RNF4	0	0	1	1	pACTBD-B	1	-10.605	0	0	0	0
55284	UBE2W	6047	RNF4	0	4	1	2	pACTBD-B	1	-11.791	0	0	0	0
7325	UBE2E2	6047	RNF4	0	4	1	1	pACTBD-B	1	-9.579	0	0	1	0
55293	UEVLD	6047	RNF4	0	5	1	2	pACTBD-B	0	NA	NA	0	0	0
65264	UBE2Z	6047	RNF4	0	0	1	2	pACTBD-B	1	NA	NA	0	0	0
64400	AKTIP	6047	RNF4	0	0	1	1	pACTBD-B	1	-7.533	0	0	0	0
63893	UBE2O	6047	RNF4	0	0	1	1	pACTBD-B	1	-5.376	0	0	0	0
55585	UBE2Q1	6047	RNF4	0	0	1	1	pACTBD-B	1	-5.882	0	0	0	0
29089	UBE2T	6047	RNF4	0	0	1	1	pACTBD-B	1	-12.317	0	0	0	0
140739	UBE2F	6047	RNF4	0	0	1	1	pACTBD-B	1	NA	NA	0	0	0
57448	BIRC6	6047	RNF4	0	0	1	1	pACTBD-B	1	-8.356	0	0	0	0
148581	UBE2U	6047	RNF4	0	0	1	1	pACTBD-B	1	NA	NA	0	0	0
340561	UBE2DNL	6047	RNF4	0	0	1	1	pACTBD-B	1	NA	NA	0	0	0
92912	UBE2Q2	6047	RNF4	0	0	1	1	pACTBD-B	1	-5.882	0	0	0	0
7251	TSG101	6047	RNF4	0	0	1	1	pACTBD-B	1	-0.949	0	0	0	0
7319	UBE2A	91694	LONRF1	0	0	1	1	pACTBD-B	1	-8.969	0	0	0	0
7320	UBE2B	91694	LONRF1	0	0	1	1	pACTBD-B	1	-5.472	0	0	0	0
11065	UBE2C	91694	LONRF1	0	0	1	1	pACTBD-B	1	-7.264	0	0	0	0
7321	UBE2D1	91694	LONRF1	0	0	1	1	pACTBD-B	1	-11.533	0	0	0	0
7322	UBE2D2	91694	LONRF1	0	0	1	1	pACTBD-B	1	-11.309	0	0	0	0
7323	UBE2D3	91694	LONRF1	0	0	1	1	pACTBD-B	1	-10.993	0	0	0	0
51619	UBE2D4	91694	LONRF1	0	0	1	1	pACTBD-B	1	-12.815	0	0	0	0
7324	UBE2E1	91694	LONRF1	0	0	1	1	pACTBD-B	1	-10.199	0	0	0	0
10477	UBE2E3	91694	LONRF1	0	0	1	1	pACTBD-B	1	-10.923	0	0	0	0
7326	UBE2G1	91694	LONRF1	0	0	1	1	pACTBD-B	1	NA	NA	0	0	0
7327	UBE2G2	91694	LONRF1	0	NA	0	0	NA	1	NA	NA	0	0	0
7328	UBE2H	91694	LONRF1	0	0	1	1	pACTBD-B	1	-7.763	0	0	0	0
7329	UBE2I	91694	LONRF1	0	0	1	2	pACTBD-B	1	-7.464	0	0	0	0
7332	UBE2L3	91694	LONRF1	0	0	1	2	pACTBD-B	1	-8.913	0	0	0	0
9246	UBE2L6	91694	LONRF1	0	4	1	1	pACTBD-B	1	-10.375	0	0	0	0
9040	UBE2M	91694	LONRF1	0	0	1	1	pACTBD-B	1	NA	NA	0	0	0
7334	UBE2N	91694	LONRF1	0	0	1	1	pACTBD-B	1	-9.784	0	0	0	0
7335	UBE2V1	91694	LONRF1	0	0	1	1	pACTBD-B	1	-3.747	0	0	0	0
7336	UBE2V2	91694	LONRF1	0	0	1	1	pACTBD-B	1	-3.747	0	0	0	0
27338	UBE2S	91694	LONRF1	0	0	1	1	pACTBD-B	1	NA	NA	0	0	0
997	CDC34	91694	LONRF1	0	0	1	1	pACTBD-B	1	-11.532	0	0	0	0
3093	HIP2	91694	LONRF1	0	0	1	1	pACTBD-B	1	-8.379	0	0	0	0
54926	UBE2R2	91694	LONRF1	0	0	1	1	pACTBD-B	1	-10.182	0	0	0	0
51465	UBE2J1	91694	LONRF1	0	0	1	1	pACTBD-B	1	-8.898	0	0	0	0
118424	UBE2J2	91694	LONRF1	0	0	1	1	pACTBD-B	1	-10.755	0	0	0	0
55284	UBE2W	91694	LONRF1	0	0	1	2	pACTBD-B	1	-11.731	0	0	0	0
7325	UBE2E2	91694	LONRF1	0	0	1	1	pACTBD-B	1	-10.269	0	0	0	0
55293	UEVLD	91694	LONRF1	0	0	1	2	pACTBD-B	1	NA	NA	0	0	0
65264	UBE2Z	91694	LONRF1	0	0	1	2	pACTBD-B	1	NA	NA	0	0	0
64400	AKTIP	91694	LONRF1	0	0	1	1	pACTBD-B	1	-11.483	1	0	0	0
63893	UBE2O	91694	LONRF1	0	0	1	1	pACTBD-B	1	-5.726	0	0	0	0
55585	UBE2Q1	91694	LONRF1	0	0	1	1	pACTBD-B	1	-8.372	0	0	0	0
29089	UBE2T	91694	LONRF1	0	0	1	1	pACTBD-B	1	-11.597	0	0	0	0
140739	UBE2F	91694	LONRF1	0	0	1	1	pACTBD-B	1	NA	NA	0	0	0
57448	BIRC6	91694	LONRF1	0	0	1	1	pACTBD-B	1	-6.786	0	0	0	0
148581	UBE2U	91694	LONRF1	0	0	1	1	pACTBD-B	1	NA	NA	0	0	0
340561	UBE2DNL	91694	LONRF1	0	0	1	1	pACTBD-B	1	NA	NA	0	0	0
92912	UBE2Q2	91694	LONRF1	0	0	1	1	pACTBD-B	1	-8.372	0	0	0	0
7251	TSG101	91694	LONRF1	0	0	1	1	pACTBD-B	1	-2.009	0	0	0	0
7319	UBE2A	6737	TRIM21	0	0	1	1	pACTBD-B	1	-7.879	0	0	0	0
7320	UBE2B	6737	TRIM21	0	0	1	1	pACTBD-B	1	-7.662	0	0	0	1
11065	UBE2C	6737	TRIM21	0	0	1	1	pACTBD-B	1	-10.214	0	0	0	0
7321	UBE2D1	6737	TRIM21	0	0	1	1	pACTBD-B	1	-12.543	0	0	0	1
7322	UBE2D2	6737	TRIM21	0	0	1	1	pACTBD-B	1	-12.039	0	0	0	0
7323	UBE2D3	6737	TRIM21	0	0	1	1	pACTBD-B	1	-10.603	0	0	0	1
51619	UBE2D4	6737	TRIM21	0	0	1	1	pACTBD-B	1	-12.215	0	0	0	0
7324	UBE2E1	6737	TRIM21	0	0	1	1	pACTBD-B	1	-12.049	0	0	0	0
10477	UBE2E3	6737	TRIM21	0	0	1	1	pACTBD-B	1	-12.423	0	0	0	0
7326	UBE2G1	6737	TRIM21	0	0	1	1	pACTBD-B	1	NA	NA	0	0	0
7327	UBE2G2	6737	TRIM21	0	NA	0	0	NA	1	NA	NA	0	0	0
7328	UBE2H	6737	TRIM21	0	0	1	1	pACTBD-B	1	-7.303	0	0	0	0
7329	UBE2I	6737	TRIM21	0	0	1	2	pACTBD-B	1	-7.844	0	0	0	0
7332	UBE2L3	6737	TRIM21	0	0	1	2	pACTBD-B	1	-10.943	0	0	0	0
9246	UBE2L6	6737	TRIM21	0	0	1	1	pACTBD-B	1	-8.315	0	0	0	1
9040	UBE2M	6737	TRIM21	0	0	1	1	pACTBD-B	1	NA	NA	0	0	0
7334	UBE2N	6737	TRIM21	0	0	1	1	pACTBD-B	1	-11.284	0	0	0	0
7335	UBE2V1	6737	TRIM21	0	0	1	1	pACTBD-B	1	-3.417	0	0	0	0
7336	UBE2V2	6737	TRIM21	0	0	1	1	pACTBD-B	1	-3.417	0	0	0	0
27338	UBE2S	6737	TRIM21	0	0	1	1	pACTBD-B	1	NA	NA	0	0	0
997	CDC34	6737	TRIM21	0	0	1	1	pACTBD-B	1	-11.382	0	0	0	0
3093	HIP2	6737	TRIM21	0	0	1	1	pACTBD-B	1	-11.339	0	0	0	0
54926	UBE2R2	6737	TRIM21	0	0	1	1	pACTBD-B	1	-11.492	0	0	0	0
51465	UBE2J1	6737	TRIM21	0	0	1	1	pACTBD-B	1	-11.028	0	0	0	0
118424	UBE2J2	6737	TRIM21	0	0	1	1	pACTBD-B	1	-8.555	0	0	0	0
55284	UBE2W	6737	TRIM21	0	0	1	2	pACTBD-B	1	-12.431	0	0	0	0
7325	UBE2E2	6737	TRIM21	0	0	1	1	pACTBD-B	1	-12.879	0	0	0	0
55293	UEVLD	6737	TRIM21	0	0	1	2	pACTBD-B	1	NA	NA	0	0	0
65264	UBE2Z	6737	TRIM21	0	0	1	2	pACTBD-B	1	NA	NA	0	0	0
64400	AKTIP	6737	TRIM21	0	0	1	1	pACTBD-B	1	-7.033	0	0	0	0
63893	UBE2O	6737	TRIM21	0	0	1	1	pACTBD-B	1	-5.736	0	0	0	0
55585	UBE2Q1	6737	TRIM21	0	0	1	1	pACTBD-B	1	-6.022	1	0	0	0
29089	UBE2T	6737	TRIM21	0	0	1	1	pACTBD-B	1	-12.427	0	0	0	0
140739	UBE2F	6737	TRIM21	0	0	1	1	pACTBD-B	1	NA	NA	0	0	0
57448	BIRC6	6737	TRIM21	0	0	1	1	pACTBD-B	1	-10.006	0	0	0	0
148581	UBE2U	6737	TRIM21	0	0	1	1	pACTBD-B	1	NA	NA	0	0	0
340561	UBE2DNL	6737	TRIM21	0	0	1	1	pACTBD-B	1	NA	NA	0	0	0
92912	UBE2Q2	6737	TRIM21	0	0	1	1	pACTBD-B	1	-6.022	1	0	0	0
7251	TSG101	6737	TRIM21	0	0	1	1	pACTBD-B	1	-3.589	0	0	0	0
7319	UBE2A	53840	TRIM34	0	0	1	1	pACTBD-B	1	NA	NA	0	0	0
7320	UBE2B	53840	TRIM34	0	0	1	1	pACTBD-B	1	NA	NA	0	0	0
11065	UBE2C	53840	TRIM34	0	0	1	1	pACTBD-B	1	NA	NA	0	0	0
7321	UBE2D1	53840	TRIM34	0	0	1	1	pACTBD-B	1	NA	NA	0	0	0
7322	UBE2D2	53840	TRIM34	0	0	1	1	pACTBD-B	1	NA	NA	0	0	0
7323	UBE2D3	53840	TRIM34	0	0	1	1	pACTBD-B	1	NA	NA	0	0	0
51619	UBE2D4	53840	TRIM34	0	0	1	1	pACTBD-B	1	NA	NA	0	0	0
7324	UBE2E1	53840	TRIM34	0	0	1	1	pACTBD-B	1	NA	NA	0	0	0
10477	UBE2E3	53840	TRIM34	0	0	1	1	pACTBD-B	1	NA	NA	0	0	0
7326	UBE2G1	53840	TRIM34	0	0	1	1	pACTBD-B	1	NA	NA	0	0	0
7327	UBE2G2	53840	TRIM34	0	NA	0	0	NA	1	NA	NA	0	0	0
7328	UBE2H	53840	TRIM34	0	0	1	1	pACTBD-B	1	NA	NA	0	0	0
7329	UBE2I	53840	TRIM34	0	0	1	2	pACTBD-B	1	NA	NA	0	0	0
7332	UBE2L3	53840	TRIM34	0	0	1	2	pACTBD-B	1	NA	NA	0	0	0
9246	UBE2L6	53840	TRIM34	0	0	1	1	pACTBD-B	1	NA	NA	0	0	0
9040	UBE2M	53840	TRIM34	0	0	1	1	pACTBD-B	1	NA	NA	0	0	0
7334	UBE2N	53840	TRIM34	0	0	1	1	pACTBD-B	1	NA	NA	0	0	0
7335	UBE2V1	53840	TRIM34	0	0	1	1	pACTBD-B	1	NA	NA	0	0	0
7336	UBE2V2	53840	TRIM34	0	0	1	1	pACTBD-B	1	NA	NA	0	0	0
27338	UBE2S	53840	TRIM34	0	0	1	1	pACTBD-B	1	NA	NA	0	0	0
997	CDC34	53840	TRIM34	0	0	1	1	pACTBD-B	1	NA	NA	0	0	0
3093	HIP2	53840	TRIM34	0	4	1	1	pACTBD-B	1	NA	NA	0	0	0
54926	UBE2R2	53840	TRIM34	0	0	1	1	pACTBD-B	1	NA	NA	0	0	0
51465	UBE2J1	53840	TRIM34	0	0	1	1	pACTBD-B	1	NA	NA	0	0	0
118424	UBE2J2	53840	TRIM34	0	0	1	1	pACTBD-B	1	NA	NA	0	0	0
55284	UBE2W	53840	TRIM34	0	0	1	2	pACTBD-B	1	NA	NA	0	0	0
7325	UBE2E2	53840	TRIM34	0	0	1	1	pACTBD-B	1	NA	NA	0	0	0
55293	UEVLD	53840	TRIM34	0	0	1	2	pACTBD-B	1	NA	NA	0	0	0
65264	UBE2Z	53840	TRIM34	0	0	1	2	pACTBD-B	1	NA	NA	0	0	0
64400	AKTIP	53840	TRIM34	0	0	1	1	pACTBD-B	1	NA	NA	0	0	0
63893	UBE2O	53840	TRIM34	0	0	1	1	pACTBD-B	1	NA	NA	0	0	0
55585	UBE2Q1	53840	TRIM34	0	0	1	1	pACTBD-B	1	NA	NA	0	0	0
29089	UBE2T	53840	TRIM34	0	0	1	1	pACTBD-B	1	NA	NA	0	0	0
140739	UBE2F	53840	TRIM34	0	0	1	1	pACTBD-B	1	NA	NA	0	0	0
57448	BIRC6	53840	TRIM34	0	0	1	1	pACTBD-B	1	NA	NA	0	0	0
148581	UBE2U	53840	TRIM34	0	0	1	1	pACTBD-B	1	NA	NA	0	0	0
340561	UBE2DNL	53840	TRIM34	0	0	1	1	pACTBD-B	1	NA	NA	0	0	0
92912	UBE2Q2	53840	TRIM34	0	0	1	1	pACTBD-B	1	NA	NA	0	0	0
7251	TSG101	53840	TRIM34	0	0	1	1	pACTBD-B	1	NA	NA	0	0	0
7319	UBE2A	26001	RNF167	0	0	1	1	pACTBD-B	1	NA	NA	0	0	0
7320	UBE2B	26001	RNF167	0	0	1	1	pACTBD-B	1	NA	NA	0	0	0
11065	UBE2C	26001	RNF167	0	0	1	1	pACTBD-B	1	NA	NA	0	0	0
7321	UBE2D1	26001	RNF167	0	0	1	1	pACTBD-B	1	NA	NA	0	0	0
7322	UBE2D2	26001	RNF167	0	0	1	1	pACTBD-B	1	NA	NA	0	0	0
7323	UBE2D3	26001	RNF167	0	0	1	1	pACTBD-B	1	NA	NA	0	0	1
51619	UBE2D4	26001	RNF167	0	0	1	1	pACTBD-B	1	NA	NA	0	0	0
7324	UBE2E1	26001	RNF167	0	0	1	1	pACTBD-B	1	NA	NA	0	0	0
10477	UBE2E3	26001	RNF167	0	0	1	1	pACTBD-B	1	NA	NA	0	0	0
7326	UBE2G1	26001	RNF167	0	0	1	1	pACTBD-B	1	NA	NA	0	0	1
7327	UBE2G2	26001	RNF167	0	NA	0	0	NA	1	NA	NA	0	0	0
7328	UBE2H	26001	RNF167	0	0	1	1	pACTBD-B	1	NA	NA	0	0	0
7329	UBE2I	26001	RNF167	0	0	1	2	pACTBD-B	1	NA	NA	0	0	0
7332	UBE2L3	26001	RNF167	0	0	1	2	pACTBD-B	1	NA	NA	0	0	0
9246	UBE2L6	26001	RNF167	0	0	1	1	pACTBD-B	1	NA	NA	0	0	0
9040	UBE2M	26001	RNF167	0	0	1	1	pACTBD-B	1	NA	NA	1	0	0
7334	UBE2N	26001	RNF167	0	0	1	1	pACTBD-B	1	NA	NA	0	0	0
7335	UBE2V1	26001	RNF167	0	0	1	1	pACTBD-B	1	NA	NA	0	0	0
7336	UBE2V2	26001	RNF167	0	0	1	1	pACTBD-B	1	NA	NA	0	0	0
27338	UBE2S	26001	RNF167	0	0	1	1	pACTBD-B	1	NA	NA	0	0	0
997	CDC34	26001	RNF167	0	0	1	1	pACTBD-B	1	NA	NA	0	0	0
3093	HIP2	26001	RNF167	0	4	1	1	pACTBD-B	1	NA	NA	0	0	0
54926	UBE2R2	26001	RNF167	0	0	1	1	pACTBD-B	1	NA	NA	0	0	0
51465	UBE2J1	26001	RNF167	0	0	1	1	pACTBD-B	1	NA	NA	0	0	0
118424	UBE2J2	26001	RNF167	0	0	1	1	pACTBD-B	1	NA	NA	0	0	0
55284	UBE2W	26001	RNF167	0	0	1	2	pACTBD-B	1	NA	NA	0	0	0
7325	UBE2E2	26001	RNF167	0	0	1	1	pACTBD-B	1	NA	NA	0	0	0
55293	UEVLD	26001	RNF167	0	0	1	2	pACTBD-B	1	NA	NA	0	0	0
65264	UBE2Z	26001	RNF167	0	0	1	2	pACTBD-B	1	NA	NA	0	0	0
64400	AKTIP	26001	RNF167	0	0	1	1	pACTBD-B	1	NA	NA	0	0	0
63893	UBE2O	26001	RNF167	0	0	1	1	pACTBD-B	1	NA	NA	0	0	0
55585	UBE2Q1	26001	RNF167	0	0	1	1	pACTBD-B	1	NA	NA	0	0	0
29089	UBE2T	26001	RNF167	0	0	1	1	pACTBD-B	1	NA	NA	0	0	0
140739	UBE2F	26001	RNF167	0	0	1	1	pACTBD-B	1	NA	NA	0	0	0
57448	BIRC6	26001	RNF167	0	0	1	1	pACTBD-B	1	NA	NA	0	0	0
148581	UBE2U	26001	RNF167	0	0	1	1	pACTBD-B	1	NA	NA	0	0	0
340561	UBE2DNL	26001	RNF167	0	0	1	1	pACTBD-B	1	NA	NA	0	0	0
92912	UBE2Q2	26001	RNF167	0	0	1	1	pACTBD-B	1	NA	NA	0	0	0
7251	TSG101	26001	RNF167	0	0	1	1	pACTBD-B	1	NA	NA	0	0	0
7319	UBE2A	115426	UHRF2	0	0	1	1	pACTBD-B	1	NA	NA	0	0	0
7320	UBE2B	115426	UHRF2	0	0	1	1	pACTBD-B	1	NA	NA	0	0	0
11065	UBE2C	115426	UHRF2	0	0	1	1	pACTBD-B	1	NA	NA	0	0	0
7321	UBE2D1	115426	UHRF2	0	0	1	1	pACTBD-B	1	NA	NA	0	0	0
7322	UBE2D2	115426	UHRF2	0	0	1	1	pACTBD-B	1	NA	NA	0	0	0
7323	UBE2D3	115426	UHRF2	0	0	1	1	pACTBD-B	1	NA	NA	0	0	0
51619	UBE2D4	115426	UHRF2	0	0	1	1	pACTBD-B	1	NA	NA	0	0	0
7324	UBE2E1	115426	UHRF2	0	0	1	1	pACTBD-B	1	NA	NA	0	0	0
10477	UBE2E3	115426	UHRF2	0	0	1	1	pACTBD-B	1	NA	NA	0	0	0
7326	UBE2G1	115426	UHRF2	0	0	1	1	pACTBD-B	1	NA	NA	0	0	0
7327	UBE2G2	115426	UHRF2	0	NA	0	0	NA	1	NA	NA	0	0	0
7328	UBE2H	115426	UHRF2	0	0	1	1	pACTBD-B	1	NA	NA	0	0	0
7329	UBE2I	115426	UHRF2	0	0	1	2	pACTBD-B	1	NA	NA	0	0	0
7332	UBE2L3	115426	UHRF2	0	0	1	2	pACTBD-B	1	NA	NA	0	0	0
9246	UBE2L6	115426	UHRF2	0	0	1	1	pACTBD-B	1	NA	NA	0	0	0
9040	UBE2M	115426	UHRF2	0	0	1	1	pACTBD-B	1	NA	NA	0	0	0
7334	UBE2N	115426	UHRF2	0	0	1	1	pACTBD-B	1	NA	NA	0	0	0
7335	UBE2V1	115426	UHRF2	0	0	1	1	pACTBD-B	1	NA	NA	0	0	0
7336	UBE2V2	115426	UHRF2	0	0	1	1	pACTBD-B	1	NA	NA	0	0	0
27338	UBE2S	115426	UHRF2	0	0	1	1	pACTBD-B	1	NA	NA	0	0	0
997	CDC34	115426	UHRF2	0	0	1	1	pACTBD-B	1	NA	NA	0	0	0
3093	HIP2	115426	UHRF2	0	4	1	1	pACTBD-B	1	NA	NA	0	0	0
54926	UBE2R2	115426	UHRF2	0	0	1	1	pACTBD-B	1	NA	NA	0	0	0
51465	UBE2J1	115426	UHRF2	0	0	1	1	pACTBD-B	1	NA	NA	0	0	0
118424	UBE2J2	115426	UHRF2	0	0	1	1	pACTBD-B	1	NA	NA	0	0	0
55284	UBE2W	115426	UHRF2	0	0	1	2	pACTBD-B	1	NA	NA	0	0	0
7325	UBE2E2	115426	UHRF2	0	0	1	1	pACTBD-B	1	NA	NA	0	0	0
55293	UEVLD	115426	UHRF2	0	0	1	2	pACTBD-B	1	NA	NA	0	0	0
65264	UBE2Z	115426	UHRF2	0	0	1	2	pACTBD-B	1	NA	NA	0	0	0
64400	AKTIP	115426	UHRF2	0	0	1	1	pACTBD-B	1	NA	NA	0	0	0
63893	UBE2O	115426	UHRF2	0	0	1	1	pACTBD-B	1	NA	NA	0	0	0
55585	UBE2Q1	115426	UHRF2	0	0	1	1	pACTBD-B	1	NA	NA	0	0	0
29089	UBE2T	115426	UHRF2	0	0	1	1	pACTBD-B	1	NA	NA	0	0	0
140739	UBE2F	115426	UHRF2	0	0	1	1	pACTBD-B	1	NA	NA	0	0	0
57448	BIRC6	115426	UHRF2	0	0	1	1	pACTBD-B	1	NA	NA	0	0	0
148581	UBE2U	115426	UHRF2	0	0	1	1	pACTBD-B	1	NA	NA	0	0	0
340561	UBE2DNL	115426	UHRF2	0	0	1	1	pACTBD-B	1	NA	NA	0	0	0
92912	UBE2Q2	115426	UHRF2	0	0	1	1	pACTBD-B	1	NA	NA	0	0	0
7251	TSG101	115426	UHRF2	0	0	1	1	pACTBD-B	1	NA	NA	0	0	0
7319	UBE2A	84231	TRAF7	0	0	1	1	pACTBD-B	1	-5.289	0	0	0	0
7320	UBE2B	84231	TRAF7	0	0	1	1	pACTBD-B	1	-5.962	0	0	0	0
11065	UBE2C	84231	TRAF7	0	0	1	1	pACTBD-B	1	-7.024	0	0	0	0
7321	UBE2D1	84231	TRAF7	0	4	1	1	pACTBD-B	1	-9.333	0	0	0	0
7322	UBE2D2	84231	TRAF7	0	4	1	1	pACTBD-B	1	-9.289	0	0	0	0
7323	UBE2D3	84231	TRAF7	0	0	1	1	pACTBD-B	1	-10.303	0	0	0	0
51619	UBE2D4	84231	TRAF7	0	4	1	1	pACTBD-B	1	-10.845	0	0	0	0
7324	UBE2E1	84231	TRAF7	0	0	1	1	pACTBD-B	1	-9.519	0	0	0	0
10477	UBE2E3	84231	TRAF7	0	0	1	1	pACTBD-B	1	-10.483	0	0	0	0
7326	UBE2G1	84231	TRAF7	0	0	1	1	pACTBD-B	1	NA	NA	0	0	0
7327	UBE2G2	84231	TRAF7	0	NA	0	0	NA	1	NA	NA	0	0	0
7328	UBE2H	84231	TRAF7	0	0	1	1	pACTBD-B	1	-8.063	0	0	0	0
7329	UBE2I	84231	TRAF7	0	0	1	2	pACTBD-B	1	-6.304	0	0	0	0
7332	UBE2L3	84231	TRAF7	0	4	1	2	pACTBD-B	1	-8.673	1	0	0	0
9246	UBE2L6	84231	TRAF7	0	5	1	1	pACTBD-B	1	-10.235	0	0	0	0
9040	UBE2M	84231	TRAF7	0	0	1	1	pACTBD-B	1	NA	NA	0	0	0
7334	UBE2N	84231	TRAF7	0	0	1	1	pACTBD-B	1	-8.684	0	0	0	0
7335	UBE2V1	84231	TRAF7	0	0	1	1	pACTBD-B	1	-1.557	0	0	0	0
7336	UBE2V2	84231	TRAF7	0	0	1	1	pACTBD-B	1	-1.557	0	0	0	0
27338	UBE2S	84231	TRAF7	0	0	1	1	pACTBD-B	1	NA	NA	0	0	0
997	CDC34	84231	TRAF7	0	0	1	1	pACTBD-B	1	-7.382	0	0	0	0
3093	HIP2	84231	TRAF7	0	4	1	1	pACTBD-B	1	-8.429	0	0	0	0
54926	UBE2R2	84231	TRAF7	0	0	1	1	pACTBD-B	1	-6.892	0	0	0	0
51465	UBE2J1	84231	TRAF7	0	0	1	1	pACTBD-B	1	-8.578	1	0	0	0
118424	UBE2J2	84231	TRAF7	0	0	1	1	pACTBD-B	1	-8.995	0	0	0	0
55284	UBE2W	84231	TRAF7	0	0	1	2	pACTBD-B	1	-7.731	0	0	0	0
7325	UBE2E2	84231	TRAF7	0	0	1	1	pACTBD-B	1	-10.419	0	0	0	0
55293	UEVLD	84231	TRAF7	0	0	1	2	pACTBD-B	1	NA	NA	0	0	0
65264	UBE2Z	84231	TRAF7	0	0	1	2	pACTBD-B	1	NA	NA	0	0	0
64400	AKTIP	84231	TRAF7	0	0	1	1	pACTBD-B	1	-8.783	0	0	0	0
63893	UBE2O	84231	TRAF7	0	0	1	1	pACTBD-B	1	-3.536	0	0	0	0
55585	UBE2Q1	84231	TRAF7	0	0	1	1	pACTBD-B	1	-6.892	0	0	0	0
29089	UBE2T	84231	TRAF7	0	0	1	1	pACTBD-B	1	-9.927	0	0	0	0
140739	UBE2F	84231	TRAF7	0	0	1	1	pACTBD-B	1	NA	NA	0	0	0
57448	BIRC6	84231	TRAF7	0	0	1	1	pACTBD-B	1	-6.006	0	0	0	0
148581	UBE2U	84231	TRAF7	0	0	1	1	pACTBD-B	1	NA	NA	0	0	0
340561	UBE2DNL	84231	TRAF7	0	0	1	1	pACTBD-B	1	NA	NA	0	0	0
92912	UBE2Q2	84231	TRAF7	0	0	1	1	pACTBD-B	1	-6.892	0	0	0	0
7251	TSG101	84231	TRAF7	0	0	1	1	pACTBD-B	1	-1.019	1	0	0	0
7319	UBE2A	23609	MKRN2	0	0	1	1	pACTBD-B	1	-2.579	1	0	0	1
7320	UBE2B	23609	MKRN2	0	0	1	1	pACTBD-B	1	-2.222	1	0	0	0
11065	UBE2C	23609	MKRN2	0	0	1	1	pACTBD-B	1	-4.684	1	0	0	0
7321	UBE2D1	23609	MKRN2	0	0	1	1	pACTBD-B	1	-8.583	0	0	0	0
7322	UBE2D2	23609	MKRN2	0	0	1	1	pACTBD-B	1	-8.529	0	0	0	0
7323	UBE2D3	23609	MKRN2	0	0	1	1	pACTBD-B	1	-8.743	0	0	0	1
51619	UBE2D4	23609	MKRN2	0	0	1	1	pACTBD-B	1	-9.075	0	0	0	0
7324	UBE2E1	23609	MKRN2	0	0	1	1	pACTBD-B	1	-8.609	0	0	0	0
10477	UBE2E3	23609	MKRN2	0	0	1	1	pACTBD-B	1	-9.843	0	0	0	0
7326	UBE2G1	23609	MKRN2	0	0	1	1	pACTBD-B	1	NA	NA	0	0	1
7327	UBE2G2	23609	MKRN2	0	NA	0	0	NA	1	NA	NA	0	0	1
7328	UBE2H	23609	MKRN2	0	0	1	1	pACTBD-B	1	-6.333	0	0	0	0
7329	UBE2I	23609	MKRN2	0	0	1	2	pACTBD-B	1	-1.944	1	0	0	0
7332	UBE2L3	23609	MKRN2	0	0	1	2	pACTBD-B	1	-8.563	0	0	0	0
9246	UBE2L6	23609	MKRN2	0	0	1	1	pACTBD-B	1	-8.365	0	0	0	1
9040	UBE2M	23609	MKRN2	0	0	1	1	pACTBD-B	1	NA	NA	0	0	0
7334	UBE2N	23609	MKRN2	0	0	1	1	pACTBD-B	1	-3.144	1	0	0	1
7335	UBE2V1	23609	MKRN2	0	0	1	1	pACTBD-B	1	0.182	1	0	0	0
7336	UBE2V2	23609	MKRN2	0	0	1	1	pACTBD-B	1	0.182	1	0	0	0
27338	UBE2S	23609	MKRN2	0	0	1	1	pACTBD-B	1	NA	NA	0	0	0
997	CDC34	23609	MKRN2	0	0	1	1	pACTBD-B	1	0.187	1	0	0	0
3093	HIP2	23609	MKRN2	0	4	1	1	pACTBD-B	1	-7.639	0	0	0	1
54926	UBE2R2	23609	MKRN2	0	0	1	1	pACTBD-B	1	-7.242	1	0	0	0
51465	UBE2J1	23609	MKRN2	0	0	1	1	pACTBD-B	1	-2.178	1	0	0	0
118424	UBE2J2	23609	MKRN2	0	0	1	1	pACTBD-B	1	-7.385	0	0	0	0
55284	UBE2W	23609	MKRN2	0	0	1	2	pACTBD-B	1	-9.371	0	0	0	0
7325	UBE2E2	23609	MKRN2	0	0	1	1	pACTBD-B	1	-9.149	0	0	0	0
55293	UEVLD	23609	MKRN2	0	0	1	2	pACTBD-B	1	NA	NA	0	0	0
65264	UBE2Z	23609	MKRN2	0	0	1	2	pACTBD-B	1	NA	NA	0	0	0
64400	AKTIP	23609	MKRN2	0	0	1	1	pACTBD-B	1	-6.333	1	0	0	0
63893	UBE2O	23609	MKRN2	0	0	1	1	pACTBD-B	1	0.073	1	0	0	0
55585	UBE2Q1	23609	MKRN2	0	0	1	1	pACTBD-B	1	-4.512	0	0	0	0
29089	UBE2T	23609	MKRN2	0	0	1	1	pACTBD-B	1	-8.437	0	0	0	0
140739	UBE2F	23609	MKRN2	0	0	1	1	pACTBD-B	1	NA	NA	0	0	0
57448	BIRC6	23609	MKRN2	0	0	1	1	pACTBD-B	1	-0.706	1	0	0	0
148581	UBE2U	23609	MKRN2	0	0	1	1	pACTBD-B	1	NA	NA	0	0	0
340561	UBE2DNL	23609	MKRN2	0	0	1	1	pACTBD-B	1	NA	NA	0	0	0
92912	UBE2Q2	23609	MKRN2	0	0	1	1	pACTBD-B	1	-4.512	0	0	0	0
7251	TSG101	23609	MKRN2	0	0	1	1	pACTBD-B	1	3.38	1	0	0	0
7319	UBE2A	221687	RNF182	0	0	1	1	pACTBD-B	1	-9.999	0	0	0	0
7320	UBE2B	221687	RNF182	0	0	1	1	pACTBD-B	1	-10.112	0	0	0	0
11065	UBE2C	221687	RNF182	0	0	1	1	pACTBD-B	1	-7.844	0	0	0	0
7321	UBE2D1	221687	RNF182	0	0	1	1	pACTBD-B	1	-12.113	0	0	0	0
7322	UBE2D2	221687	RNF182	0	0	1	1	pACTBD-B	1	-11.759	0	0	0	0
7323	UBE2D3	221687	RNF182	0	0	1	1	pACTBD-B	1	-12.613	0	0	0	0
51619	UBE2D4	221687	RNF182	0	0	1	1	pACTBD-B	1	-11.805	0	0	0	0
7324	UBE2E1	221687	RNF182	0	0	1	1	pACTBD-B	1	-11.869	0	0	0	0
10477	UBE2E3	221687	RNF182	0	0	1	1	pACTBD-B	1	-12.473	0	0	0	0
7326	UBE2G1	221687	RNF182	0	0	1	1	pACTBD-B	1	NA	NA	0	0	0
7327	UBE2G2	221687	RNF182	0	NA	0	0	NA	1	NA	NA	0	0	0
7328	UBE2H	221687	RNF182	0	0	1	1	pACTBD-B	1	-8.963	0	0	0	0
7329	UBE2I	221687	RNF182	0	0	1	2	pACTBD-B	1	-7.274	0	0	0	0
7332	UBE2L3	221687	RNF182	0	0	1	2	pACTBD-B	1	-12.883	0	0	0	0
9246	UBE2L6	221687	RNF182	0	0	1	1	pACTBD-B	1	-12.345	0	0	0	0
9040	UBE2M	221687	RNF182	0	0	1	1	pACTBD-B	1	NA	NA	0	0	0
7334	UBE2N	221687	RNF182	0	0	1	1	pACTBD-B	1	-12.234	0	0	0	0
7335	UBE2V1	221687	RNF182	0	0	1	1	pACTBD-B	1	-3.737	0	0	0	0
7336	UBE2V2	221687	RNF182	0	0	1	1	pACTBD-B	1	-3.737	0	0	0	0
27338	UBE2S	221687	RNF182	0	0	1	1	pACTBD-B	1	NA	NA	0	0	0
997	CDC34	221687	RNF182	0	0	1	1	pACTBD-B	1	-8.752	0	0	0	0
3093	HIP2	221687	RNF182	0	0	1	1	pACTBD-B	1	-12.929	0	0	0	0
54926	UBE2R2	221687	RNF182	0	0	1	1	pACTBD-B	1	-10.932	0	0	0	0
51465	UBE2J1	221687	RNF182	0	0	1	1	pACTBD-B	1	-10.088	0	0	0	0
118424	UBE2J2	221687	RNF182	0	0	1	1	pACTBD-B	1	-11.195	0	0	0	0
55284	UBE2W	221687	RNF182	0	0	1	2	pACTBD-B	1	-11.151	0	0	0	0
7325	UBE2E2	221687	RNF182	0	0	1	1	pACTBD-B	1	-11.259	0	0	0	0
55293	UEVLD	221687	RNF182	0	0	1	2	pACTBD-B	1	NA	NA	0	0	0
65264	UBE2Z	221687	RNF182	0	0	1	2	pACTBD-B	1	NA	NA	0	0	0
64400	AKTIP	221687	RNF182	0	0	1	1	pACTBD-B	1	-9.303	0	0	0	0
63893	UBE2O	221687	RNF182	0	0	1	1	pACTBD-B	1	-4.566	0	0	0	0
55585	UBE2Q1	221687	RNF182	0	0	1	1	pACTBD-B	1	-9.882	0	0	0	0
29089	UBE2T	221687	RNF182	0	0	1	1	pACTBD-B	1	-12.537	0	0	0	0
140739	UBE2F	221687	RNF182	0	0	1	1	pACTBD-B	1	NA	NA	0	0	0
57448	BIRC6	221687	RNF182	0	0	1	1	pACTBD-B	1	-7.316	0	0	0	0
148581	UBE2U	221687	RNF182	0	0	1	1	pACTBD-B	1	NA	NA	0	0	0
340561	UBE2DNL	221687	RNF182	0	0	1	1	pACTBD-B	1	NA	NA	0	0	0
92912	UBE2Q2	221687	RNF182	0	0	1	1	pACTBD-B	1	-9.882	0	0	0	0
7251	TSG101	221687	RNF182	0	0	1	1	pACTBD-B	1	-3.919	0	0	0	0
7319	UBE2A	50862	RNF141	0	0	1	1	pACTBD-B	1	-4.199	1	0	0	0
7320	UBE2B	50862	RNF141	0	0	1	1	pACTBD-B	1	-2.252	1	0	0	0
11065	UBE2C	50862	RNF141	0	0	1	1	pACTBD-B	1	-3.614	1	0	0	0
7321	UBE2D1	50862	RNF141	0	0	1	1	pACTBD-B	1	-7.843	0	0	0	0
7322	UBE2D2	50862	RNF141	0	0	1	1	pACTBD-B	1	-8.589	0	0	0	0
7323	UBE2D3	50862	RNF141	0	0	1	1	pACTBD-B	1	-10.723	0	0	0	0
51619	UBE2D4	50862	RNF141	0	0	1	1	pACTBD-B	1	-9.385	0	0	0	0
7324	UBE2E1	50862	RNF141	0	0	1	1	pACTBD-B	1	-9.279	0	0	0	0
10477	UBE2E3	50862	RNF141	0	0	1	1	pACTBD-B	1	-10.633	0	0	0	0
7326	UBE2G1	50862	RNF141	0	0	1	1	pACTBD-B	1	NA	NA	0	0	0
7327	UBE2G2	50862	RNF141	0	NA	0	0	NA	1	NA	NA	0	0	0
7328	UBE2H	50862	RNF141	0	0	1	1	pACTBD-B	1	-3.643	0	0	0	0
7329	UBE2I	50862	RNF141	0	0	1	2	pACTBD-B	1	-6.284	1	0	0	0
7332	UBE2L3	50862	RNF141	0	0	1	2	pACTBD-B	1	-9.073	1	0	0	0
9246	UBE2L6	50862	RNF141	0	0	1	1	pACTBD-B	1	-11.445	0	0	0	0
9040	UBE2M	50862	RNF141	0	0	1	1	pACTBD-B	1	NA	NA	0	0	0
7334	UBE2N	50862	RNF141	0	0	1	1	pACTBD-B	1	-3.874	1	0	0	0
7335	UBE2V1	50862	RNF141	0	0	1	1	pACTBD-B	1	5.702	1	0	0	0
7336	UBE2V2	50862	RNF141	0	0	1	1	pACTBD-B	1	5.702	1	0	0	0
27338	UBE2S	50862	RNF141	0	0	1	1	pACTBD-B	1	NA	NA	0	0	0
997	CDC34	50862	RNF141	0	0	1	1	pACTBD-B	1	-7.702	1	0	0	0
3093	HIP2	50862	RNF141	0	0	1	1	pACTBD-B	1	-10.039	0	0	0	0
54926	UBE2R2	50862	RNF141	0	0	1	1	pACTBD-B	1	-5.332	1	0	0	0
51465	UBE2J1	50862	RNF141	0	0	1	1	pACTBD-B	1	-4.028	1	0	0	0
118424	UBE2J2	50862	RNF141	0	0	1	1	pACTBD-B	1	-6.415	0	0	0	0
55284	UBE2W	50862	RNF141	0	0	1	2	pACTBD-B	1	-12.081	0	0	0	0
7325	UBE2E2	50862	RNF141	0	0	1	1	pACTBD-B	1	-9.189	0	0	0	0
55293	UEVLD	50862	RNF141	0	0	1	2	pACTBD-B	1	NA	NA	0	0	0
65264	UBE2Z	50862	RNF141	0	0	1	2	pACTBD-B	1	NA	NA	0	0	0
64400	AKTIP	50862	RNF141	0	0	1	1	pACTBD-B	1	-9.043	1	0	0	0
63893	UBE2O	50862	RNF141	0	0	1	1	pACTBD-B	1	-1.126	1	0	0	0
55585	UBE2Q1	50862	RNF141	0	0	1	1	pACTBD-B	1	-5.832	0	0	0	0
29089	UBE2T	50862	RNF141	0	0	1	1	pACTBD-B	1	-12.287	0	0	0	0
140739	UBE2F	50862	RNF141	0	0	1	1	pACTBD-B	1	NA	NA	0	0	0
57448	BIRC6	50862	RNF141	0	0	1	1	pACTBD-B	1	-7.266	1	0	0	0
148581	UBE2U	50862	RNF141	0	0	1	1	pACTBD-B	1	NA	NA	0	0	0
340561	UBE2DNL	50862	RNF141	0	0	1	1	pACTBD-B	1	NA	NA	0	0	0
92912	UBE2Q2	50862	RNF141	0	0	1	1	pACTBD-B	1	-5.832	0	0	0	0
7251	TSG101	50862	RNF141	0	0	1	1	pACTBD-B	1	3.69	1	0	0	0
7319	UBE2A	22888	UBOX5	0	0	1	1	pACTBD-B	1	-2.479	0	0	0	0
7320	UBE2B	22888	UBOX5	0	0	1	1	pACTBD-B	1	-3.002	0	0	0	0
11065	UBE2C	22888	UBOX5	0	0	1	1	pACTBD-B	1	-6.054	0	0	0	0
7321	UBE2D1	22888	UBOX5	0	5	1	1	pACTBD-B	1	-6.793	0	1	0	0
7322	UBE2D2	22888	UBOX5	0	5	1	1	pACTBD-B	1	-5.439	0	0	0	0
7323	UBE2D3	22888	UBOX5	0	5	1	1	pACTBD-B	1	-7.403	0	0	0	0
51619	UBE2D4	22888	UBOX5	0	5	1	1	pACTBD-B	1	-6.505	0	0	0	0
7324	UBE2E1	22888	UBOX5	0	4	1	1	pACTBD-B	1	-6.459	0	1	0	0
10477	UBE2E3	22888	UBOX5	0	0	1	1	pACTBD-B	1	-6.453	0	1	0	0
7326	UBE2G1	22888	UBOX5	0	0	1	1	pACTBD-B	1	NA	NA	0	0	0
7327	UBE2G2	22888	UBOX5	0	NA	0	0	NA	1	NA	NA	0	0	0
7328	UBE2H	22888	UBOX5	0	5	1	1	pACTBD-B	1	-5.323	0	0	0	0
7329	UBE2I	22888	UBOX5	0	0	1	2	pACTBD-B	1	-3.574	0	0	0	0
7332	UBE2L3	22888	UBOX5	0	5	1	2	pACTBD-B	1	-6.023	0	1	0	0
9246	UBE2L6	22888	UBOX5	0	0	1	1	pACTBD-B	1	-6.555	0	0	0	0
9040	UBE2M	22888	UBOX5	0	0	1	1	pACTBD-B	1	NA	NA	0	0	0
7334	UBE2N	22888	UBOX5	0	0	1	1	pACTBD-B	1	-6.294	0	0	0	0
7335	UBE2V1	22888	UBOX5	0	5	1	1	pACTBD-B	1	1.852	0	0	0	0
7336	UBE2V2	22888	UBOX5	0	0	1	1	pACTBD-B	1	1.852	0	0	0	0
27338	UBE2S	22888	UBOX5	0	0	1	1	pACTBD-B	1	NA	NA	0	0	0
997	CDC34	22888	UBOX5	0	0	1	1	pACTBD-B	1	-4.012	1	0	0	0
3093	HIP2	22888	UBOX5	0	5	1	1	pACTBD-B	1	-7.939	0	0	0	0
54926	UBE2R2	22888	UBOX5	0	0	1	1	pACTBD-B	1	-3.802	0	0	0	0
51465	UBE2J1	22888	UBOX5	0	0	1	1	pACTBD-B	1	-4.328	0	0	0	0
118424	UBE2J2	22888	UBOX5	0	0	1	1	pACTBD-B	1	-5.325	0	0	0	0
55284	UBE2W	22888	UBOX5	0	5	1	2	pACTBD-B	1	-7.131	0	0	0	0
7325	UBE2E2	22888	UBOX5	0	4	1	1	pACTBD-B	1	-6.619	0	1	0	0
55293	UEVLD	22888	UBOX5	0	0	1	2	pACTBD-B	1	NA	NA	0	0	0
65264	UBE2Z	22888	UBOX5	0	0	1	2	pACTBD-B	1	NA	NA	0	0	0
64400	AKTIP	22888	UBOX5	0	0	1	1	pACTBD-B	1	-4.553	0	0	0	0
63893	UBE2O	22888	UBOX5	0	0	1	1	pACTBD-B	1	-0.976	0	0	0	0
55585	UBE2Q1	22888	UBOX5	0	0	1	1	pACTBD-B	1	-4.532	0	0	0	0
29089	UBE2T	22888	UBOX5	0	0	1	1	pACTBD-B	1	-6.857	0	0	0	0
140739	UBE2F	22888	UBOX5	0	0	1	1	pACTBD-B	1	NA	NA	0	0	0
57448	BIRC6	22888	UBOX5	0	0	1	1	pACTBD-B	1	-3.316	0	0	0	0
148581	UBE2U	22888	UBOX5	0	0	1	1	pACTBD-B	1	NA	NA	0	0	0
340561	UBE2DNL	22888	UBOX5	0	0	1	1	pACTBD-B	1	NA	NA	0	0	0
92912	UBE2Q2	22888	UBOX5	0	0	1	1	pACTBD-B	1	-4.532	0	0	0	0
7251	TSG101	22888	UBOX5	0	0	1	1	pACTBD-B	1	4.75	1	0	0	0
7319	UBE2A	5828	PXMP3	0	0	1	1	pACTBD-B	1	-5.969	0	0	0	1
7320	UBE2B	5828	PXMP3	0	0	1	1	pACTBD-B	1	-5.442	0	0	0	0
11065	UBE2C	5828	PXMP3	0	0	1	1	pACTBD-B	1	-6.624	0	0	0	0
7321	UBE2D1	5828	PXMP3	0	0	1	1	pACTBD-B	1	-7.783	0	0	0	0
7322	UBE2D2	5828	PXMP3	0	0	1	1	pACTBD-B	1	-8.619	0	0	0	0
7323	UBE2D3	5828	PXMP3	0	0	1	1	pACTBD-B	1	-6.613	0	0	0	1
51619	UBE2D4	5828	PXMP3	0	0	1	1	pACTBD-B	1	-7.415	0	0	0	0
7324	UBE2E1	5828	PXMP3	0	0	1	1	pACTBD-B	1	-8.719	0	0	0	0
10477	UBE2E3	5828	PXMP3	0	0	1	1	pACTBD-B	1	-7.133	0	0	0	0
7326	UBE2G1	5828	PXMP3	0	0	1	1	pACTBD-B	1	NA	NA	0	0	1
7327	UBE2G2	5828	PXMP3	0	NA	0	0	NA	1	NA	NA	0	0	1
7328	UBE2H	5828	PXMP3	0	0	1	1	pACTBD-B	1	-6.853	0	0	0	0
7329	UBE2I	5828	PXMP3	0	0	1	2	pACTBD-B	1	-2.904	0	0	0	0
7332	UBE2L3	5828	PXMP3	0	0	1	2	pACTBD-B	1	-6.853	0	0	0	0
9246	UBE2L6	5828	PXMP3	0	0	1	1	pACTBD-B	1	-7.755	0	0	0	1
9040	UBE2M	5828	PXMP3	0	0	1	1	pACTBD-B	1	NA	NA	0	0	0
7334	UBE2N	5828	PXMP3	0	0	1	1	pACTBD-B	1	-6.174	0	0	0	0
7335	UBE2V1	5828	PXMP3	0	0	1	1	pACTBD-B	1	-2.107	0	0	0	0
7336	UBE2V2	5828	PXMP3	0	0	1	1	pACTBD-B	1	-2.107	0	0	0	0
27338	UBE2S	5828	PXMP3	0	0	1	1	pACTBD-B	1	NA	NA	0	0	0
997	CDC34	5828	PXMP3	0	0	1	1	pACTBD-B	1	-6.122	0	0	0	0
3093	HIP2	5828	PXMP3	0	0	1	1	pACTBD-B	1	-7.319	0	0	0	1
54926	UBE2R2	5828	PXMP3	0	0	1	1	pACTBD-B	1	-4.322	0	0	0	0
51465	UBE2J1	5828	PXMP3	0	0	1	1	pACTBD-B	1	-7.218	0	0	0	1
118424	UBE2J2	5828	PXMP3	0	0	1	1	pACTBD-B	1	-7.025	0	0	0	0
55284	UBE2W	5828	PXMP3	0	0	1	2	pACTBD-B	1	-11.241	0	0	0	0
7325	UBE2E2	5828	PXMP3	0	0	1	1	pACTBD-B	1	-9.459	0	0	0	0
55293	UEVLD	5828	PXMP3	0	0	1	2	pACTBD-B	1	NA	NA	0	0	0
65264	UBE2Z	5828	PXMP3	0	0	1	2	pACTBD-B	1	NA	NA	0	0	0
64400	AKTIP	5828	PXMP3	0	0	1	1	pACTBD-B	1	-4.583	0	0	0	0
63893	UBE2O	5828	PXMP3	0	0	1	1	pACTBD-B	1	-2.746	0	0	0	0
55585	UBE2Q1	5828	PXMP3	0	0	1	1	pACTBD-B	1	-4.512	0	0	0	0
29089	UBE2T	5828	PXMP3	0	0	1	1	pACTBD-B	1	-10.297	0	0	0	0
140739	UBE2F	5828	PXMP3	0	0	1	1	pACTBD-B	1	NA	NA	0	0	0
57448	BIRC6	5828	PXMP3	0	0	1	1	pACTBD-B	1	-6.576	0	0	0	0
148581	UBE2U	5828	PXMP3	0	0	1	1	pACTBD-B	1	NA	NA	0	0	0
340561	UBE2DNL	5828	PXMP3	0	0	1	1	pACTBD-B	1	NA	NA	0	0	0
92912	UBE2Q2	5828	PXMP3	0	0	1	1	pACTBD-B	1	-4.512	0	0	0	0
7251	TSG101	5828	PXMP3	0	0	1	1	pACTBD-B	1	2.24	0	0	0	0
7319	UBE2A	9978	RBX1	0	0	1	2	pACTBD-B	1	-3.549	1	0	0	1
7320	UBE2B	9978	RBX1	0	0	1	2	pACTBD-B	1	-3.032	1	0	0	0
11065	UBE2C	9978	RBX1	0	0	1	2	pACTBD-B	1	-4.184	1	0	0	0
7321	UBE2D1	9978	RBX1	0	0	1	2	pACTBD-B	1	-8.743	0	0	0	0
7322	UBE2D2	9978	RBX1	0	0	1	2	pACTBD-B	1	-8.099	0	0	0	0
7323	UBE2D3	9978	RBX1	0	0	1	2	pACTBD-B	1	-8.813	0	0	0	1
51619	UBE2D4	9978	RBX1	0	0	1	2	pACTBD-B	1	-8.915	0	0	0	0
7324	UBE2E1	9978	RBX1	0	0	1	2	pACTBD-B	1	-8.379	0	0	0	0
10477	UBE2E3	9978	RBX1	0	0	1	2	pACTBD-B	1	-9.983	0	0	0	0
7326	UBE2G1	9978	RBX1	0	0	1	2	pACTBD-B	1	NA	NA	0	1	0
7327	UBE2G2	9978	RBX1	0	NA	0	0	NA	1	NA	NA	0	0	0
7328	UBE2H	9978	RBX1	0	0	1	2	pACTBD-B	1	-9.593	0	0	0	1
7329	UBE2I	9978	RBX1	0	0	1	4	pACTBD-B	1	-3.614	1	0	0	0
7332	UBE2L3	9978	RBX1	0	0	1	4	pACTBD-B	1	-7.673	0	0	0	0
9246	UBE2L6	9978	RBX1	0	0	1	2	pACTBD-B	1	-8.365	0	0	0	0
9040	UBE2M	9978	RBX1	1	0	1	2	pACTBD-B	1	NA	NA	0	0	0
7334	UBE2N	9978	RBX1	0	0	1	2	pACTBD-B	1	-3.404	1	0	0	0
7335	UBE2V1	9978	RBX1	0	0	1	2	pACTBD-B	1	-1.037	1	0	0	0
7336	UBE2V2	9978	RBX1	0	0	1	2	pACTBD-B	1	-1.037	1	0	0	0
27338	UBE2S	9978	RBX1	0	0	1	2	pACTBD-B	1	NA	NA	0	0	0
997	CDC34	9978	RBX1	0	0	1	2	pACTBD-B	1	-0.972	1	0	1	1
3093	HIP2	9978	RBX1	0	0	1	2	pACTBD-B	1	-6.659	0	0	0	1
54926	UBE2R2	9978	RBX1	0	0	1	2	pACTBD-B	1	-2.992	1	0	1	0
51465	UBE2J1	9978	RBX1	0	0	1	2	pACTBD-B	1	-6.558	1	0	0	0
118424	UBE2J2	9978	RBX1	0	0	1	2	pACTBD-B	1	-9.265	0	0	0	0
55284	UBE2W	9978	RBX1	0	0	1	4	pACTBD-B	1	-7.801	0	0	0	0
7325	UBE2E2	9978	RBX1	0	0	1	2	pACTBD-B	1	-10.429	0	0	0	0
55293	UEVLD	9978	RBX1	0	0	1	4	pACTBD-B	1	NA	NA	0	0	0
65264	UBE2Z	9978	RBX1	0	0	1	4	pACTBD-B	1	NA	NA	0	0	0
64400	AKTIP	9978	RBX1	0	0	1	2	pACTBD-B	1	-7.193	1	0	0	0
63893	UBE2O	9978	RBX1	0	0	1	2	pACTBD-B	1	-0.106	1	0	0	0
55585	UBE2Q1	9978	RBX1	0	0	1	2	pACTBD-B	1	-5.352	0	0	0	0
29089	UBE2T	9978	RBX1	0	0	1	2	pACTBD-B	1	-8.277	1	0	0	0
140739	UBE2F	9978	RBX1	0	0	1	2	pACTBD-B	1	NA	NA	0	0	0
57448	BIRC6	9978	RBX1	0	0	1	2	pACTBD-B	1	-2.536	1	0	0	0
148581	UBE2U	9978	RBX1	0	0	1	2	pACTBD-B	1	NA	NA	0	0	0
340561	UBE2DNL	9978	RBX1	0	0	1	2	pACTBD-B	1	NA	NA	0	0	0
92912	UBE2Q2	9978	RBX1	0	0	1	2	pACTBD-B	1	-5.352	0	0	0	0
7251	TSG101	9978	RBX1	0	0	1	2	pACTBD-B	1	5.78	1	0	0	0
7319	UBE2A	6048	RNF5	0	0	1	3	pACTBD-B|pGAD|pACTBE-B	1	-3.269	1	0	0	0
7320	UBE2B	6048	RNF5	0	0	1	3	pACTBD-B|pGAD|pACTBE-B	1	-1.122	1	0	0	0
11065	UBE2C	6048	RNF5	0	0	1	3	pACTBD-B|pGAD|pACTBE-B	1	-4.944	1	0	0	0
7321	UBE2D1	6048	RNF5	1	5	1	3	pACTBD-B|pGAD|pACTBE-B	1	-10.013	0	0	0	0
7322	UBE2D2	6048	RNF5	0	5	1	3	pACTBD-B|pGAD|pACTBE-B	1	-8.939	0	1	0	0
7323	UBE2D3	6048	RNF5	1	5	1	3	pACTBD-B|pGAD|pACTBE-B	1	-8.963	0	1	0	0
51619	UBE2D4	6048	RNF5	0	5	1	3	pACTBD-B|pGAD|pACTBE-B	1	-9.955	0	0	0	0
7324	UBE2E1	6048	RNF5	0	5	1	3	pACTBD-B|pGAD|pACTBE-B	1	-8.739	0	1	0	0
10477	UBE2E3	6048	RNF5	0	5	1	3	pACTBD-B|pGAD|pACTBE-B	1	-9.013	1	1	0	0
7326	UBE2G1	6048	RNF5	0	0	1	3	pACTBD-B|pGAD|pACTBE-B	1	NA	NA	0	0	0
7327	UBE2G2	6048	RNF5	0	NA	0	0	NA	1	NA	NA	0	0	0
7328	UBE2H	6048	RNF5	0	0	1	3	pACTBD-B|pGAD|pACTBE-B	1	-7.113	0	0	0	0
7329	UBE2I	6048	RNF5	0	0	1	6	pACTBD-B|pGAD|pACTBE-B	1	-0.514	1	0	0	0
7332	UBE2L3	6048	RNF5	0	0	1	6	pACTBD-B|pGAD|pACTBE-B	1	-9.453	1	0	0	0
9246	UBE2L6	6048	RNF5	0	0	1	3	pACTBD-B|pGAD|pACTBE-B	1	-8.465	0	0	0	0
9040	UBE2M	6048	RNF5	0	0	1	3	pACTBD-B|pGAD|pACTBE-B	1	NA	NA	0	0	0
7334	UBE2N	6048	RNF5	0	0	1	3	pACTBD-B|pGAD|pACTBE-B	1	-4.794	1	0	0	0
7335	UBE2V1	6048	RNF5	0	4	1	3	pACTBD-B|pGAD|pACTBE-B	1	1.072	1	0	0	0
7336	UBE2V2	6048	RNF5	0	0	1	3	pACTBD-B|pGAD|pACTBE-B	1	1.072	1	0	0	0
27338	UBE2S	6048	RNF5	0	0	1	3	pACTBD-B|pGAD|pACTBE-B	1	NA	NA	0	0	0
997	CDC34	6048	RNF5	0	0	1	3	pACTBD-B|pGAD|pACTBE-B	1	-2.922	1	0	0	0
3093	HIP2	6048	RNF5	0	5	1	3	pACTBD-B|pGAD|pACTBE-B	1	-10.079	0	0	0	0
54926	UBE2R2	6048	RNF5	0	0	1	3	pACTBD-B|pGAD|pACTBE-B	1	-5.612	1	0	0	0
51465	UBE2J1	6048	RNF5	0	0	1	3	pACTBD-B|pGAD|pACTBE-B	1	-2.638	1	1	0	0
118424	UBE2J2	6048	RNF5	0	0	1	3	pACTBD-B|pGAD|pACTBE-B	1	-9.955	0	0	0	0
55284	UBE2W	6048	RNF5	0	4	1	6	pACTBD-B|pGAD|pACTBE-B	1	-10.051	0	0	0	0
7325	UBE2E2	6048	RNF5	0	5	1	3	pACTBD-B|pGAD|pACTBE-B	1	-9.209	0	0	0	0
55293	UEVLD	6048	RNF5	0	0	1	6	pACTBD-B|pGAD|pACTBE-B	1	NA	NA	0	0	0
65264	UBE2Z	6048	RNF5	0	4	1	6	pACTBD-B|pGAD|pACTBE-B	0	NA	NA	0	0	0
64400	AKTIP	6048	RNF5	0	0	1	3	pACTBD-B|pGAD|pACTBE-B	1	-8.133	1	0	0	0
63893	UBE2O	6048	RNF5	0	0	1	3	pACTBD-B|pGAD|pACTBE-B	1	-1.116	1	0	0	0
55585	UBE2Q1	6048	RNF5	0	0	1	3	pACTBD-B|pGAD|pACTBE-B	1	-7.222	0	0	0	0
29089	UBE2T	6048	RNF5	0	0	1	3	pACTBD-B|pGAD|pACTBE-B	1	-8.487	0	0	0	0
140739	UBE2F	6048	RNF5	0	0	1	3	pACTBD-B|pGAD|pACTBE-B	1	NA	NA	0	0	0
57448	BIRC6	6048	RNF5	0	0	1	3	pACTBD-B|pGAD|pACTBE-B	1	-0.296	1	0	0	0
148581	UBE2U	6048	RNF5	0	0	1	3	pACTBD-B|pGAD|pACTBE-B	1	NA	NA	0	0	0
340561	UBE2DNL	6048	RNF5	0	0	1	3	pACTBD-B|pGAD|pACTBE-B	1	NA	NA	0	0	0
92912	UBE2Q2	6048	RNF5	0	0	1	3	pACTBD-B|pGAD|pACTBE-B	1	-7.222	0	0	0	0
7251	TSG101	6048	RNF5	0	0	1	3	pACTBD-B|pGAD|pACTBE-B	1	5.27	1	0	0	0
7319	UBE2A	63891	RNF123	0	0	1	1	pACTBD-B	1	-7.949	0	0	0	0
7320	UBE2B	63891	RNF123	0	0	1	1	pACTBD-B	1	-4.822	0	0	0	0
11065	UBE2C	63891	RNF123	0	0	1	1	pACTBD-B	1	-5.894	0	0	0	0
7321	UBE2D1	63891	RNF123	0	0	1	1	pACTBD-B	1	-10.023	0	0	0	0
7322	UBE2D2	63891	RNF123	0	0	1	1	pACTBD-B	1	-8.959	0	0	0	0
7323	UBE2D3	63891	RNF123	0	0	1	1	pACTBD-B	1	-10.563	0	0	0	0
51619	UBE2D4	63891	RNF123	0	0	1	1	pACTBD-B	1	-8.285	0	0	0	0
7324	UBE2E1	63891	RNF123	0	0	1	1	pACTBD-B	1	-8.249	0	0	0	0
10477	UBE2E3	63891	RNF123	0	0	1	1	pACTBD-B	1	-10.013	0	0	0	0
7326	UBE2G1	63891	RNF123	0	0	1	1	pACTBD-B	1	NA	NA	0	0	0
7327	UBE2G2	63891	RNF123	0	NA	0	0	NA	1	NA	NA	0	0	0
7328	UBE2H	63891	RNF123	0	0	1	1	pACTBD-B	1	-6.603	0	0	0	1
7329	UBE2I	63891	RNF123	0	0	1	2	pACTBD-B	1	-7.244	0	0	0	0
7332	UBE2L3	63891	RNF123	0	0	1	2	pACTBD-B	1	-8.273	0	0	0	0
9246	UBE2L6	63891	RNF123	0	0	1	1	pACTBD-B	1	-2.815	0	0	0	0
9040	UBE2M	63891	RNF123	0	0	1	1	pACTBD-B	1	NA	NA	0	0	0
7334	UBE2N	63891	RNF123	0	0	1	1	pACTBD-B	1	-7.634	0	0	0	0
7335	UBE2V1	63891	RNF123	0	0	1	1	pACTBD-B	1	-1.777	0	0	0	0
7336	UBE2V2	63891	RNF123	0	0	1	1	pACTBD-B	1	-1.777	0	0	0	0
27338	UBE2S	63891	RNF123	0	0	1	1	pACTBD-B	1	NA	NA	0	0	0
997	CDC34	63891	RNF123	0	0	1	1	pACTBD-B	1	-7.962	0	0	0	1
3093	HIP2	63891	RNF123	0	0	1	1	pACTBD-B	1	-9.449	0	0	0	0
54926	UBE2R2	63891	RNF123	0	0	1	1	pACTBD-B	1	-6.172	1	0	0	0
51465	UBE2J1	63891	RNF123	0	0	1	1	pACTBD-B	1	-4.118	0	0	0	0
118424	UBE2J2	63891	RNF123	0	0	1	1	pACTBD-B	1	-4.945	0	0	0	0
55284	UBE2W	63891	RNF123	1	0	1	2	pACTBD-B	1	-9.071	0	0	0	0
7325	UBE2E2	63891	RNF123	0	0	1	1	pACTBD-B	1	-7.029	0	0	0	0
55293	UEVLD	63891	RNF123	0	0	1	2	pACTBD-B	1	NA	NA	0	0	0
65264	UBE2Z	63891	RNF123	0	0	1	2	pACTBD-B	1	NA	NA	0	0	0
64400	AKTIP	63891	RNF123	0	0	1	1	pACTBD-B	1	-5.933	1	0	0	0
63893	UBE2O	63891	RNF123	0	0	1	1	pACTBD-B	1	-2.636	0	0	0	0
55585	UBE2Q1	63891	RNF123	0	0	1	1	pACTBD-B	1	2.197	1	0	0	0
29089	UBE2T	63891	RNF123	0	0	1	1	pACTBD-B	1	-10.437	0	0	0	0
140739	UBE2F	63891	RNF123	0	0	1	1	pACTBD-B	1	NA	NA	0	0	0
57448	BIRC6	63891	RNF123	0	0	1	1	pACTBD-B	1	-5.896	0	0	0	0
148581	UBE2U	63891	RNF123	0	0	1	1	pACTBD-B	1	NA	NA	0	0	0
340561	UBE2DNL	63891	RNF123	0	0	1	1	pACTBD-B	1	NA	NA	0	0	0
92912	UBE2Q2	63891	RNF123	0	0	1	1	pACTBD-B	1	2.197	1	0	0	0
7251	TSG101	63891	RNF123	0	0	1	1	pACTBD-B	1	1.39	0	0	0	0
7319	UBE2A	10293	TRIP	0	0	1	2	pACTBD-B	1	-4.969	1	0	0	0
7320	UBE2B	10293	TRIP	0	0	1	2	pACTBD-B	1	1.987	1	0	0	0
11065	UBE2C	10293	TRIP	0	0	1	2	pACTBD-B	1	-2.744	1	0	0	0
7321	UBE2D1	10293	TRIP	0	0	1	2	pACTBD-B	1	-8.003	0	0	0	0
7322	UBE2D2	10293	TRIP	0	0	1	2	pACTBD-B	1	-7.309	0	0	0	0
7323	UBE2D3	10293	TRIP	0	0	1	2	pACTBD-B	1	-8.143	0	0	0	0
51619	UBE2D4	10293	TRIP	0	0	1	2	pACTBD-B	1	-8.595	0	0	0	0
7324	UBE2E1	10293	TRIP	0	0	1	2	pACTBD-B	1	-7.989	0	0	0	0
10477	UBE2E3	10293	TRIP	0	0	1	2	pACTBD-B	1	-7.603	0	0	0	0
7326	UBE2G1	10293	TRIP	0	0	1	2	pACTBD-B	1	NA	NA	0	0	0
7327	UBE2G2	10293	TRIP	0	NA	0	0	NA	1	NA	NA	0	0	0
7328	UBE2H	10293	TRIP	0	4	1	2	pACTBD-B	0	-5.663	0	0	0	0
7329	UBE2I	10293	TRIP	0	0	1	4	pACTBD-B	1	-4.954	1	0	0	0
7332	UBE2L3	10293	TRIP	0	0	1	4	pACTBD-B	1	-7.353	0	0	0	0
9246	UBE2L6	10293	TRIP	0	0	1	2	pACTBD-B	1	-7.405	0	0	0	0
9040	UBE2M	10293	TRIP	0	0	1	2	pACTBD-B	1	NA	NA	0	0	0
7334	UBE2N	10293	TRIP	0	0	1	2	pACTBD-B	1	-6.504	1	0	1	0
7335	UBE2V1	10293	TRIP	0	0	1	2	pACTBD-B	1	3.672	1	0	0	0
7336	UBE2V2	10293	TRIP	0	0	1	2	pACTBD-B	1	3.672	1	0	0	0
27338	UBE2S	10293	TRIP	0	0	1	2	pACTBD-B	1	NA	NA	0	0	0
997	CDC34	10293	TRIP	0	0	1	2	pACTBD-B	1	2.947	1	0	0	0
3093	HIP2	10293	TRIP	0	4	1	2	pACTBD-B	0	-7.939	0	0	0	0
54926	UBE2R2	10293	TRIP	0	0	1	2	pACTBD-B	1	3.147	1	0	0	0
51465	UBE2J1	10293	TRIP	0	0	1	2	pACTBD-B	1	-5.298	1	0	0	0
118424	UBE2J2	10293	TRIP	0	0	1	2	pACTBD-B	1	-6.815	0	0	0	0
55284	UBE2W	10293	TRIP	0	0	1	4	pACTBD-B	1	-8.291	0	0	0	0
7325	UBE2E2	10293	TRIP	0	0	1	2	pACTBD-B	1	-8.269	0	0	0	0
55293	UEVLD	10293	TRIP	0	0	1	4	pACTBD-B	1	NA	NA	0	0	0
65264	UBE2Z	10293	TRIP	0	4	1	4	pACTBD-B	0	NA	NA	0	0	0
64400	AKTIP	10293	TRIP	0	0	1	2	pACTBD-B	1	-6.523	1	0	0	0
63893	UBE2O	10293	TRIP	0	0	1	2	pACTBD-B	1	-0.346	1	0	0	0
55585	UBE2Q1	10293	TRIP	0	0	1	2	pACTBD-B	1	-3.112	0	0	0	0
29089	UBE2T	10293	TRIP	0	0	1	2	pACTBD-B	1	-6.817	0	0	0	0
140739	UBE2F	10293	TRIP	0	0	1	2	pACTBD-B	1	NA	NA	0	0	0
57448	BIRC6	10293	TRIP	0	0	1	2	pACTBD-B	1	-0.946	1	0	0	0
148581	UBE2U	10293	TRIP	0	0	1	2	pACTBD-B	1	NA	NA	0	0	0
340561	UBE2DNL	10293	TRIP	0	0	1	2	pACTBD-B	1	NA	NA	0	0	0
92912	UBE2Q2	10293	TRIP	0	0	1	2	pACTBD-B	1	-3.112	0	0	0	0
7251	TSG101	10293	TRIP	0	5	1	2	pACTBD-B	0	4.47	1	0	0	0
7319	UBE2A	84759	PCGF1	0	0	1	1	pACTBD-B	1	-2.509	1	0	0	1
7320	UBE2B	84759	PCGF1	0	0	1	1	pACTBD-B	1	-1.692	1	0	0	0
11065	UBE2C	84759	PCGF1	0	0	1	1	pACTBD-B	1	-0.914	1	0	0	0
7321	UBE2D1	84759	PCGF1	0	0	1	1	pACTBD-B	1	-10.253	0	0	0	0
7322	UBE2D2	84759	PCGF1	0	0	1	1	pACTBD-B	1	-7.679	0	0	0	0
7323	UBE2D3	84759	PCGF1	0	0	1	1	pACTBD-B	1	-9.353	0	0	0	1
51619	UBE2D4	84759	PCGF1	0	0	1	1	pACTBD-B	1	-9.355	0	0	0	0
7324	UBE2E1	84759	PCGF1	0	0	1	1	pACTBD-B	1	-8.789	0	0	0	0
10477	UBE2E3	84759	PCGF1	0	0	1	1	pACTBD-B	1	-8.693	0	0	0	0
7326	UBE2G1	84759	PCGF1	0	0	1	1	pACTBD-B	1	NA	NA	0	0	0
7327	UBE2G2	84759	PCGF1	0	NA	0	0	NA	1	NA	NA	0	0	1
7328	UBE2H	84759	PCGF1	0	0	1	1	pACTBD-B	1	-7.563	0	0	0	0
7329	UBE2I	84759	PCGF1	0	0	1	2	pACTBD-B	1	-2.234	1	0	0	0
7332	UBE2L3	84759	PCGF1	0	0	1	2	pACTBD-B	1	-8.743	0	0	0	0
9246	UBE2L6	84759	PCGF1	0	0	1	1	pACTBD-B	1	-9.025	0	0	0	1
9040	UBE2M	84759	PCGF1	0	0	1	1	pACTBD-B	1	NA	NA	0	0	0
7334	UBE2N	84759	PCGF1	0	0	1	1	pACTBD-B	1	-2.424	1	0	0	0
7335	UBE2V1	84759	PCGF1	0	0	1	1	pACTBD-B	1	3.672	1	0	0	0
7336	UBE2V2	84759	PCGF1	0	0	1	1	pACTBD-B	1	3.672	1	0	0	0
27338	UBE2S	84759	PCGF1	0	0	1	1	pACTBD-B	1	NA	NA	0	0	0
997	CDC34	84759	PCGF1	0	0	1	1	pACTBD-B	1	-3.222	1	0	0	0
3093	HIP2	84759	PCGF1	0	0	1	1	pACTBD-B	1	-4.979	0	0	0	1
54926	UBE2R2	84759	PCGF1	0	0	1	1	pACTBD-B	1	-2.052	1	0	0	0
51465	UBE2J1	84759	PCGF1	0	0	1	1	pACTBD-B	1	0.901	1	0	0	0
118424	UBE2J2	84759	PCGF1	0	0	1	1	pACTBD-B	1	-7.695	0	0	0	0
55284	UBE2W	84759	PCGF1	0	0	1	2	pACTBD-B	1	-8.081	0	0	0	0
7325	UBE2E2	84759	PCGF1	0	0	1	1	pACTBD-B	1	-8.759	0	0	0	0
55293	UEVLD	84759	PCGF1	0	0	1	2	pACTBD-B	1	NA	NA	0	0	0
65264	UBE2Z	84759	PCGF1	0	0	1	2	pACTBD-B	1	NA	NA	0	0	0
64400	AKTIP	84759	PCGF1	0	0	1	1	pACTBD-B	1	-2.943	1	0	0	0
63893	UBE2O	84759	PCGF1	0	0	1	1	pACTBD-B	1	0.853	1	0	0	0
55585	UBE2Q1	84759	PCGF1	0	0	1	1	pACTBD-B	1	-4.452	0	0	0	0
29089	UBE2T	84759	PCGF1	0	0	1	1	pACTBD-B	1	-9.647	0	0	0	0
140739	UBE2F	84759	PCGF1	0	0	1	1	pACTBD-B	1	NA	NA	0	0	0
57448	BIRC6	84759	PCGF1	0	0	1	1	pACTBD-B	1	-0.366	1	0	0	0
148581	UBE2U	84759	PCGF1	0	0	1	1	pACTBD-B	1	NA	NA	0	0	0
340561	UBE2DNL	84759	PCGF1	0	0	1	1	pACTBD-B	1	NA	NA	0	0	0
92912	UBE2Q2	84759	PCGF1	0	0	1	1	pACTBD-B	1	-4.452	0	0	0	0
7251	TSG101	84759	PCGF1	0	0	1	1	pACTBD-B	1	2.89	1	0	0	0
7319	UBE2A	9618	TRAF4	0	0	1	1	pACTBD-B	1	-4.369	1	0	0	0
7320	UBE2B	9618	TRAF4	0	0	1	1	pACTBD-B	1	-4.332	1	0	0	0
11065	UBE2C	9618	TRAF4	0	0	1	1	pACTBD-B	1	-2.194	1	0	0	1
7321	UBE2D1	9618	TRAF4	0	0	1	1	pACTBD-B	1	-7.593	0	0	0	0
7322	UBE2D2	9618	TRAF4	0	0	1	1	pACTBD-B	1	-6.719	0	0	0	0
7323	UBE2D3	9618	TRAF4	0	0	1	1	pACTBD-B	1	-7.503	0	0	0	0
51619	UBE2D4	9618	TRAF4	0	0	1	1	pACTBD-B	1	-6.185	0	0	0	0
7324	UBE2E1	9618	TRAF4	0	0	1	1	pACTBD-B	1	-8.579	0	0	0	1
10477	UBE2E3	9618	TRAF4	0	0	1	1	pACTBD-B	1	-5.653	0	0	0	0
7326	UBE2G1	9618	TRAF4	0	0	1	1	pACTBD-B	1	NA	NA	0	0	0
7327	UBE2G2	9618	TRAF4	0	NA	0	0	NA	1	NA	NA	0	0	0
7328	UBE2H	9618	TRAF4	0	0	1	1	pACTBD-B	1	-7.163	0	0	0	0
7329	UBE2I	9618	TRAF4	0	0	1	2	pACTBD-B	1	-3.414	1	1	0	0
7332	UBE2L3	9618	TRAF4	0	0	1	2	pACTBD-B	1	-7.793	1	0	0	0
9246	UBE2L6	9618	TRAF4	0	0	1	1	pACTBD-B	1	-6.865	0	0	0	0
9040	UBE2M	9618	TRAF4	0	0	1	1	pACTBD-B	1	NA	NA	0	0	0
7334	UBE2N	9618	TRAF4	0	0	1	1	pACTBD-B	1	-1.174	1	0	0	1
7335	UBE2V1	9618	TRAF4	0	0	1	1	pACTBD-B	1	-2.657	1	0	0	0
7336	UBE2V2	9618	TRAF4	0	0	1	1	pACTBD-B	1	-2.657	1	0	0	0
27338	UBE2S	9618	TRAF4	0	0	1	1	pACTBD-B	1	NA	NA	0	0	0
997	CDC34	9618	TRAF4	0	0	1	1	pACTBD-B	1	-2.572	1	0	0	0
3093	HIP2	9618	TRAF4	0	0	1	1	pACTBD-B	1	-6.849	0	0	0	0
54926	UBE2R2	9618	TRAF4	0	0	1	1	pACTBD-B	1	-3.032	1	0	0	0
51465	UBE2J1	9618	TRAF4	0	0	1	1	pACTBD-B	1	1.391	1	0	0	1
118424	UBE2J2	9618	TRAF4	0	0	1	1	pACTBD-B	1	-9.075	0	0	0	0
55284	UBE2W	9618	TRAF4	0	0	1	2	pACTBD-B	1	-6.981	0	0	0	0
7325	UBE2E2	9618	TRAF4	0	0	1	1	pACTBD-B	1	-8.469	0	0	0	0
55293	UEVLD	9618	TRAF4	0	0	1	2	pACTBD-B	1	NA	NA	0	0	0
65264	UBE2Z	9618	TRAF4	0	0	1	2	pACTBD-B	1	NA	NA	0	0	0
64400	AKTIP	9618	TRAF4	0	0	1	1	pACTBD-B	1	-3.333	1	0	0	0
63893	UBE2O	9618	TRAF4	0	0	1	1	pACTBD-B	1	-2.096	1	0	0	0
55585	UBE2Q1	9618	TRAF4	0	0	1	1	pACTBD-B	1	-6.192	0	0	0	0
29089	UBE2T	9618	TRAF4	0	0	1	1	pACTBD-B	1	-9.277	0	0	0	0
140739	UBE2F	9618	TRAF4	0	0	1	1	pACTBD-B	1	NA	NA	0	0	0
57448	BIRC6	9618	TRAF4	0	0	1	1	pACTBD-B	1	-2.356	1	0	0	0
148581	UBE2U	9618	TRAF4	0	0	1	1	pACTBD-B	1	NA	NA	0	0	0
340561	UBE2DNL	9618	TRAF4	0	0	1	1	pACTBD-B	1	NA	NA	0	0	0
92912	UBE2Q2	9618	TRAF4	0	0	1	1	pACTBD-B	1	-6.192	0	0	0	0
7251	TSG101	9618	TRAF4	0	0	1	1	pACTBD-B	1	3.71	1	0	0	0
7319	UBE2A	6015	RING1	0	0	1	1	pACTBD-B	1	-6.409	0	0	0	0
7320	UBE2B	6015	RING1	0	0	1	1	pACTBD-B	1	-1.882	0	0	0	0
11065	UBE2C	6015	RING1	0	0	1	1	pACTBD-B	1	-7.864	0	0	0	0
7321	UBE2D1	6015	RING1	0	4	1	1	pACTBD-B	1	-8.973	0	0	0	0
7322	UBE2D2	6015	RING1	0	5	1	1	pACTBD-B	1	-9.869	0	0	0	0
7323	UBE2D3	6015	RING1	0	4	1	1	pACTBD-B	1	-7.303	0	0	0	0
51619	UBE2D4	6015	RING1	0	4	1	1	pACTBD-B	1	-9.505	0	0	0	0
7324	UBE2E1	6015	RING1	0	4	1	1	pACTBD-B	1	-10.849	0	0	0	0
10477	UBE2E3	6015	RING1	0	4	1	1	pACTBD-B	1	-9.883	0	0	0	0
7326	UBE2G1	6015	RING1	0	0	1	1	pACTBD-B	1	NA	NA	0	0	0
7327	UBE2G2	6015	RING1	0	NA	0	0	NA	1	NA	NA	0	0	0
7328	UBE2H	6015	RING1	0	0	1	1	pACTBD-B	1	-7.383	0	0	0	0
7329	UBE2I	6015	RING1	0	0	1	2	pACTBD-B	1	-3.094	0	0	0	0
7332	UBE2L3	6015	RING1	0	0	1	2	pACTBD-B	1	-10.083	0	0	0	0
9246	UBE2L6	6015	RING1	0	0	1	1	pACTBD-B	1	-10.075	0	0	0	0
9040	UBE2M	6015	RING1	0	0	1	1	pACTBD-B	1	NA	NA	0	0	0
7334	UBE2N	6015	RING1	0	0	1	1	pACTBD-B	1	-6.654	0	0	0	0
7335	UBE2V1	6015	RING1	0	0	1	1	pACTBD-B	1	-1.437	0	0	0	0
7336	UBE2V2	6015	RING1	0	0	1	1	pACTBD-B	1	-1.437	0	0	0	0
27338	UBE2S	6015	RING1	0	0	1	1	pACTBD-B	1	NA	NA	0	0	0
997	CDC34	6015	RING1	0	0	1	1	pACTBD-B	1	-6.972	0	0	0	0
3093	HIP2	6015	RING1	0	4	1	1	pACTBD-B	1	-7.819	0	0	0	0
54926	UBE2R2	6015	RING1	0	0	1	1	pACTBD-B	1	-9.342	0	0	0	0
51465	UBE2J1	6015	RING1	0	0	1	1	pACTBD-B	1	-7.348	0	0	0	0
118424	UBE2J2	6015	RING1	0	0	1	1	pACTBD-B	1	-7.335	0	0	0	0
55284	UBE2W	6015	RING1	0	0	1	2	pACTBD-B	1	-12.571	0	0	0	0
7325	UBE2E2	6015	RING1	0	4	1	1	pACTBD-B	1	-10.529	0	0	0	0
55293	UEVLD	6015	RING1	0	0	1	2	pACTBD-B	1	NA	NA	0	0	0
65264	UBE2Z	6015	RING1	0	0	1	2	pACTBD-B	1	NA	NA	0	0	0
64400	AKTIP	6015	RING1	0	0	1	1	pACTBD-B	1	-5.343	0	0	0	0
63893	UBE2O	6015	RING1	0	0	1	1	pACTBD-B	1	-1.246	0	0	0	0
55585	UBE2Q1	6015	RING1	0	0	1	1	pACTBD-B	1	-6.272	0	0	0	0
29089	UBE2T	6015	RING1	0	0	1	1	pACTBD-B	1	-8.917	0	0	0	0
140739	UBE2F	6015	RING1	0	0	1	1	pACTBD-B	1	NA	NA	0	0	0
57448	BIRC6	6015	RING1	0	0	1	1	pACTBD-B	1	-7.326	0	0	0	0
148581	UBE2U	6015	RING1	0	0	1	1	pACTBD-B	1	NA	NA	0	0	0
340561	UBE2DNL	6015	RING1	0	0	1	1	pACTBD-B	1	NA	NA	0	0	0
92912	UBE2Q2	6015	RING1	0	0	1	1	pACTBD-B	1	-6.272	0	0	0	0
7251	TSG101	6015	RING1	0	0	1	1	pACTBD-B	1	-2.889	0	0	0	0
7319	UBE2A	9810	RNF40	0	0	1	1	pACTBD-B	1	-2.939	0	0	1	0
7320	UBE2B	9810	RNF40	0	0	1	1	pACTBD-B	1	-2.502	0	0	1	0
11065	UBE2C	9810	RNF40	0	0	1	1	pACTBD-B	1	-6.004	0	0	0	0
7321	UBE2D1	9810	RNF40	0	0	1	1	pACTBD-B	1	-6.583	0	0	0	0
7322	UBE2D2	9810	RNF40	0	0	1	1	pACTBD-B	1	-6.489	0	0	0	0
7323	UBE2D3	9810	RNF40	0	0	1	1	pACTBD-B	1	-5.173	0	0	0	0
51619	UBE2D4	9810	RNF40	0	0	1	1	pACTBD-B	1	-6.815	0	0	0	0
7324	UBE2E1	9810	RNF40	0	0	1	1	pACTBD-B	1	-5.849	0	0	0	0
10477	UBE2E3	9810	RNF40	0	0	1	1	pACTBD-B	1	-6.393	0	0	0	0
7326	UBE2G1	9810	RNF40	0	0	1	1	pACTBD-B	1	NA	NA	0	0	0
7327	UBE2G2	9810	RNF40	0	NA	0	0	NA	1	NA	NA	0	0	0
7328	UBE2H	9810	RNF40	0	0	1	1	pACTBD-B	1	-5.033	0	0	0	0
7329	UBE2I	9810	RNF40	0	0	1	2	pACTBD-B	1	-3.164	0	0	0	0
7332	UBE2L3	9810	RNF40	0	0	1	2	pACTBD-B	1	-4.483	0	0	0	0
9246	UBE2L6	9810	RNF40	0	0	1	1	pACTBD-B	1	-6.655	0	1	0	0
9040	UBE2M	9810	RNF40	0	0	1	1	pACTBD-B	1	NA	NA	0	0	0
7334	UBE2N	9810	RNF40	0	0	1	1	pACTBD-B	1	-4.564	0	0	0	0
7335	UBE2V1	9810	RNF40	0	0	1	1	pACTBD-B	1	0.042	0	0	0	0
7336	UBE2V2	9810	RNF40	0	0	1	1	pACTBD-B	1	0.042	0	0	0	0
27338	UBE2S	9810	RNF40	0	0	1	1	pACTBD-B	1	NA	NA	0	0	0
997	CDC34	9810	RNF40	0	0	1	1	pACTBD-B	1	-3.392	0	0	0	0
3093	HIP2	9810	RNF40	0	0	1	1	pACTBD-B	1	-5.219	0	0	0	0
54926	UBE2R2	9810	RNF40	0	0	1	1	pACTBD-B	1	-4.392	1	0	0	0
51465	UBE2J1	9810	RNF40	0	0	1	1	pACTBD-B	1	-4.558	0	0	0	0
118424	UBE2J2	9810	RNF40	0	0	1	1	pACTBD-B	1	-6.425	0	0	0	0
55284	UBE2W	9810	RNF40	0	0	1	2	pACTBD-B	1	-7.021	0	0	0	0
7325	UBE2E2	9810	RNF40	0	0	1	1	pACTBD-B	1	-5.159	0	0	0	0
55293	UEVLD	9810	RNF40	0	0	1	2	pACTBD-B	1	NA	NA	0	0	0
65264	UBE2Z	9810	RNF40	0	0	1	2	pACTBD-B	1	NA	NA	0	0	0
64400	AKTIP	9810	RNF40	0	0	1	1	pACTBD-B	1	-5.583	0	0	0	0
63893	UBE2O	9810	RNF40	0	0	1	1	pACTBD-B	1	-0.746	0	0	0	0
55585	UBE2Q1	9810	RNF40	0	0	1	1	pACTBD-B	1	-3.672	0	0	0	0
29089	UBE2T	9810	RNF40	0	0	1	1	pACTBD-B	1	-6.597	0	0	0	0
140739	UBE2F	9810	RNF40	0	0	1	1	pACTBD-B	1	NA	NA	0	0	0
57448	BIRC6	9810	RNF40	0	0	1	1	pACTBD-B	1	-3.126	0	0	0	0
148581	UBE2U	9810	RNF40	0	0	1	1	pACTBD-B	1	NA	NA	0	0	0
340561	UBE2DNL	9810	RNF40	0	0	1	1	pACTBD-B	1	NA	NA	0	0	0
92912	UBE2Q2	9810	RNF40	0	0	1	1	pACTBD-B	1	-3.672	0	0	0	0
7251	TSG101	9810	RNF40	0	0	1	1	pACTBD-B	1	3.55	1	0	0	0
7319	UBE2A	51255	RNF181	0	0	1	2	pACTBD-B	1	NA	NA	0	0	0
7320	UBE2B	51255	RNF181	0	0	1	2	pACTBD-B	1	NA	NA	0	0	0
11065	UBE2C	51255	RNF181	0	0	1	2	pACTBD-B	1	NA	NA	0	0	0
7321	UBE2D1	51255	RNF181	0	0	1	2	pACTBD-B	1	NA	NA	0	0	0
7322	UBE2D2	51255	RNF181	0	0	1	2	pACTBD-B	1	NA	NA	0	0	0
7323	UBE2D3	51255	RNF181	0	0	1	2	pACTBD-B	1	NA	NA	0	0	0
51619	UBE2D4	51255	RNF181	0	0	1	2	pACTBD-B	1	NA	NA	0	0	0
7324	UBE2E1	51255	RNF181	0	0	1	2	pACTBD-B	1	NA	NA	0	0	0
10477	UBE2E3	51255	RNF181	0	0	1	2	pACTBD-B	1	NA	NA	0	0	0
7326	UBE2G1	51255	RNF181	0	0	1	2	pACTBD-B	1	NA	NA	0	0	0
7327	UBE2G2	51255	RNF181	0	NA	0	0	NA	1	NA	NA	0	0	0
7328	UBE2H	51255	RNF181	0	0	1	2	pACTBD-B	1	NA	NA	0	0	0
7329	UBE2I	51255	RNF181	0	0	1	4	pACTBD-B	1	NA	NA	0	0	0
7332	UBE2L3	51255	RNF181	0	0	1	4	pACTBD-B	1	NA	NA	0	0	0
9246	UBE2L6	51255	RNF181	0	0	1	2	pACTBD-B	1	NA	NA	0	0	0
9040	UBE2M	51255	RNF181	0	0	1	2	pACTBD-B	1	NA	NA	0	0	0
7334	UBE2N	51255	RNF181	0	0	1	2	pACTBD-B	1	NA	NA	0	0	0
7335	UBE2V1	51255	RNF181	0	0	1	2	pACTBD-B	1	NA	NA	0	0	0
7336	UBE2V2	51255	RNF181	0	0	1	2	pACTBD-B	1	NA	NA	0	0	0
27338	UBE2S	51255	RNF181	0	0	1	2	pACTBD-B	1	NA	NA	0	0	0
997	CDC34	51255	RNF181	0	0	1	2	pACTBD-B	1	NA	NA	0	0	0
3093	HIP2	51255	RNF181	0	0	1	2	pACTBD-B	1	NA	NA	0	0	0
54926	UBE2R2	51255	RNF181	0	0	1	2	pACTBD-B	1	NA	NA	0	0	0
51465	UBE2J1	51255	RNF181	0	0	1	2	pACTBD-B	1	NA	NA	0	0	0
118424	UBE2J2	51255	RNF181	0	0	1	2	pACTBD-B	1	NA	NA	0	0	0
55284	UBE2W	51255	RNF181	0	0	1	4	pACTBD-B	1	NA	NA	0	0	0
7325	UBE2E2	51255	RNF181	0	0	1	2	pACTBD-B	1	NA	NA	0	0	0
55293	UEVLD	51255	RNF181	0	0	1	4	pACTBD-B	1	NA	NA	0	0	0
65264	UBE2Z	51255	RNF181	0	0	1	4	pACTBD-B	1	NA	NA	0	0	0
64400	AKTIP	51255	RNF181	0	0	1	2	pACTBD-B	1	NA	NA	0	0	0
63893	UBE2O	51255	RNF181	0	0	1	2	pACTBD-B	1	NA	NA	0	0	0
55585	UBE2Q1	51255	RNF181	0	0	1	2	pACTBD-B	1	NA	NA	0	0	0
29089	UBE2T	51255	RNF181	0	0	1	2	pACTBD-B	1	NA	NA	0	0	0
140739	UBE2F	51255	RNF181	0	0	1	2	pACTBD-B	1	NA	NA	0	0	0
57448	BIRC6	51255	RNF181	0	0	1	2	pACTBD-B	1	NA	NA	0	0	0
148581	UBE2U	51255	RNF181	0	0	1	2	pACTBD-B	1	NA	NA	0	0	0
340561	UBE2DNL	51255	RNF181	0	0	1	2	pACTBD-B	1	NA	NA	0	0	0
92912	UBE2Q2	51255	RNF181	0	0	1	2	pACTBD-B	1	NA	NA	0	0	0
7251	TSG101	51255	RNF181	0	0	1	2	pACTBD-B	1	NA	NA	0	0	0
7319	UBE2A	7844	RNF103	0	0	1	1	pACTBD-B	1	-3.949	1	0	0	0
7320	UBE2B	7844	RNF103	0	0	1	1	pACTBD-B	1	-2.872	1	0	0	0
11065	UBE2C	7844	RNF103	0	0	1	1	pACTBD-B	1	-6.444	1	0	0	0
7321	UBE2D1	7844	RNF103	0	0	1	1	pACTBD-B	1	-9.773	0	0	0	0
7322	UBE2D2	7844	RNF103	0	0	1	1	pACTBD-B	1	-8.919	0	0	0	0
7323	UBE2D3	7844	RNF103	0	0	1	1	pACTBD-B	1	-8.393	0	0	0	0
51619	UBE2D4	7844	RNF103	0	0	1	1	pACTBD-B	1	-8.865	0	0	0	0
7324	UBE2E1	7844	RNF103	0	0	1	1	pACTBD-B	1	-8.809	0	0	0	0
10477	UBE2E3	7844	RNF103	0	0	1	1	pACTBD-B	1	-10.153	0	0	0	0
7326	UBE2G1	7844	RNF103	0	0	1	1	pACTBD-B	1	NA	NA	0	0	0
7327	UBE2G2	7844	RNF103	0	NA	0	0	NA	1	NA	NA	0	0	0
7328	UBE2H	7844	RNF103	0	0	1	1	pACTBD-B	1	-7.923	0	0	0	0
7329	UBE2I	7844	RNF103	0	0	1	2	pACTBD-B	1	-4.424	1	0	0	0
7332	UBE2L3	7844	RNF103	0	0	1	2	pACTBD-B	1	-9.403	0	0	0	0
9246	UBE2L6	7844	RNF103	0	0	1	1	pACTBD-B	1	-10.595	0	0	0	0
9040	UBE2M	7844	RNF103	0	0	1	1	pACTBD-B	1	NA	NA	0	0	0
7334	UBE2N	7844	RNF103	0	0	1	1	pACTBD-B	1	-6.314	1	0	0	0
7335	UBE2V1	7844	RNF103	0	0	1	1	pACTBD-B	1	4.032	1	0	0	0
7336	UBE2V2	7844	RNF103	0	0	1	1	pACTBD-B	1	4.032	1	0	0	0
27338	UBE2S	7844	RNF103	0	0	1	1	pACTBD-B	1	NA	NA	0	0	0
997	CDC34	7844	RNF103	0	0	1	1	pACTBD-B	1	-7.982	1	0	0	0
3093	HIP2	7844	RNF103	0	0	1	1	pACTBD-B	1	-7.269	0	0	0	0
54926	UBE2R2	7844	RNF103	0	0	1	1	pACTBD-B	1	-5.142	1	0	0	0
51465	UBE2J1	7844	RNF103	0	0	1	1	pACTBD-B	1	-3.638	1	0	0	0
118424	UBE2J2	7844	RNF103	0	0	1	1	pACTBD-B	1	-8.895	0	0	0	0
55284	UBE2W	7844	RNF103	0	0	1	2	pACTBD-B	1	-11.341	0	0	0	0
7325	UBE2E2	7844	RNF103	0	0	1	1	pACTBD-B	1	-9.889	0	0	0	0
55293	UEVLD	7844	RNF103	0	0	1	2	pACTBD-B	1	NA	NA	0	0	0
65264	UBE2Z	7844	RNF103	0	0	1	2	pACTBD-B	1	NA	NA	0	0	0
64400	AKTIP	7844	RNF103	0	0	1	1	pACTBD-B	1	-7.013	1	0	0	0
63893	UBE2O	7844	RNF103	0	0	1	1	pACTBD-B	1	-4.756	1	0	0	0
55585	UBE2Q1	7844	RNF103	0	0	1	1	pACTBD-B	1	-5.532	0	0	0	0
29089	UBE2T	7844	RNF103	0	0	1	1	pACTBD-B	1	-9.627	0	0	0	0
140739	UBE2F	7844	RNF103	0	0	1	1	pACTBD-B	1	NA	NA	0	0	0
57448	BIRC6	7844	RNF103	0	0	1	1	pACTBD-B	1	-5.286	1	0	0	0
148581	UBE2U	7844	RNF103	0	0	1	1	pACTBD-B	1	NA	NA	0	0	0
340561	UBE2DNL	7844	RNF103	0	0	1	1	pACTBD-B	1	NA	NA	0	0	0
92912	UBE2Q2	7844	RNF103	0	0	1	1	pACTBD-B	1	-5.532	0	0	0	0
7251	TSG101	7844	RNF103	0	0	1	1	pACTBD-B	1	1.62	1	0	0	0
7319	UBE2A	51533	PHF7	0	0	1	1	pACTBD-B	1	NA	NA	0	0	0
7320	UBE2B	51533	PHF7	0	0	1	1	pACTBD-B	1	NA	NA	0	0	0
11065	UBE2C	51533	PHF7	0	0	1	1	pACTBD-B	1	NA	NA	0	0	0
7321	UBE2D1	51533	PHF7	0	0	1	1	pACTBD-B	1	NA	NA	0	0	0
7322	UBE2D2	51533	PHF7	0	0	1	1	pACTBD-B	1	NA	NA	0	0	0
7323	UBE2D3	51533	PHF7	0	0	1	1	pACTBD-B	1	NA	NA	0	0	0
51619	UBE2D4	51533	PHF7	0	0	1	1	pACTBD-B	1	NA	NA	0	0	0
7324	UBE2E1	51533	PHF7	0	0	1	1	pACTBD-B	1	NA	NA	0	0	0
10477	UBE2E3	51533	PHF7	0	0	1	1	pACTBD-B	1	NA	NA	0	0	0
7326	UBE2G1	51533	PHF7	0	0	1	1	pACTBD-B	1	NA	NA	0	0	0
7327	UBE2G2	51533	PHF7	0	NA	0	0	NA	1	NA	NA	0	0	0
7328	UBE2H	51533	PHF7	0	0	1	1	pACTBD-B	1	NA	NA	0	0	0
7329	UBE2I	51533	PHF7	0	0	1	2	pACTBD-B	1	NA	NA	0	0	0
7332	UBE2L3	51533	PHF7	0	0	1	2	pACTBD-B	1	NA	NA	0	0	0
9246	UBE2L6	51533	PHF7	0	0	1	1	pACTBD-B	1	NA	NA	0	0	0
9040	UBE2M	51533	PHF7	0	0	1	1	pACTBD-B	1	NA	NA	0	0	0
7334	UBE2N	51533	PHF7	0	0	1	1	pACTBD-B	1	NA	NA	0	0	0
7335	UBE2V1	51533	PHF7	0	0	1	1	pACTBD-B	1	NA	NA	0	0	0
7336	UBE2V2	51533	PHF7	0	0	1	1	pACTBD-B	1	NA	NA	0	0	0
27338	UBE2S	51533	PHF7	0	0	1	1	pACTBD-B	1	NA	NA	0	0	0
997	CDC34	51533	PHF7	0	0	1	1	pACTBD-B	1	NA	NA	0	0	0
3093	HIP2	51533	PHF7	0	0	1	1	pACTBD-B	1	NA	NA	0	0	0
54926	UBE2R2	51533	PHF7	0	0	1	1	pACTBD-B	1	NA	NA	0	0	0
51465	UBE2J1	51533	PHF7	0	0	1	1	pACTBD-B	1	NA	NA	0	0	0
118424	UBE2J2	51533	PHF7	0	0	1	1	pACTBD-B	1	NA	NA	0	0	0
55284	UBE2W	51533	PHF7	0	0	1	2	pACTBD-B	1	NA	NA	0	0	0
7325	UBE2E2	51533	PHF7	0	0	1	1	pACTBD-B	1	NA	NA	0	0	0
55293	UEVLD	51533	PHF7	0	0	1	2	pACTBD-B	1	NA	NA	0	0	0
65264	UBE2Z	51533	PHF7	0	0	1	2	pACTBD-B	1	NA	NA	0	0	0
64400	AKTIP	51533	PHF7	0	0	1	1	pACTBD-B	1	NA	NA	0	0	0
63893	UBE2O	51533	PHF7	0	0	1	1	pACTBD-B	1	NA	NA	0	0	0
55585	UBE2Q1	51533	PHF7	0	0	1	1	pACTBD-B	1	NA	NA	0	0	0
29089	UBE2T	51533	PHF7	0	0	1	1	pACTBD-B	1	NA	NA	0	0	0
140739	UBE2F	51533	PHF7	0	0	1	1	pACTBD-B	1	NA	NA	0	0	0
57448	BIRC6	51533	PHF7	0	0	1	1	pACTBD-B	1	NA	NA	0	0	0
148581	UBE2U	51533	PHF7	0	0	1	1	pACTBD-B	1	NA	NA	0	0	0
340561	UBE2DNL	51533	PHF7	0	0	1	1	pACTBD-B	1	NA	NA	0	0	0
92912	UBE2Q2	51533	PHF7	0	0	1	1	pACTBD-B	1	NA	NA	0	0	0
7251	TSG101	51533	PHF7	0	0	1	1	pACTBD-B	1	NA	NA	0	0	0
7319	UBE2A	55521	TRIM36	0	0	1	1	pACTBD-B	1	-5.069	0	0	0	0
7320	UBE2B	55521	TRIM36	0	0	1	1	pACTBD-B	1	-5.402	0	0	0	0
11065	UBE2C	55521	TRIM36	0	0	1	1	pACTBD-B	1	-6.204	0	0	0	0
7321	UBE2D1	55521	TRIM36	0	0	1	1	pACTBD-B	1	-5.623	0	0	0	0
7322	UBE2D2	55521	TRIM36	0	0	1	1	pACTBD-B	1	-7.499	0	0	0	0
7323	UBE2D3	55521	TRIM36	0	0	1	1	pACTBD-B	1	-7.803	0	0	0	0
51619	UBE2D4	55521	TRIM36	0	0	1	1	pACTBD-B	1	-6.265	0	0	0	0
7324	UBE2E1	55521	TRIM36	0	0	1	1	pACTBD-B	1	-6.639	0	0	0	0
10477	UBE2E3	55521	TRIM36	0	0	1	1	pACTBD-B	1	-6.843	0	0	0	0
7326	UBE2G1	55521	TRIM36	0	0	1	1	pACTBD-B	1	NA	NA	0	0	0
7327	UBE2G2	55521	TRIM36	0	NA	0	0	NA	1	NA	NA	0	0	0
7328	UBE2H	55521	TRIM36	0	4	1	1	pACTBD-B	1	-7.193	0	0	0	0
7329	UBE2I	55521	TRIM36	0	0	1	2	pACTBD-B	1	-5.564	0	0	0	0
7332	UBE2L3	55521	TRIM36	0	0	1	2	pACTBD-B	1	-6.163	0	0	0	0
9246	UBE2L6	55521	TRIM36	0	0	1	1	pACTBD-B	1	-9.145	0	0	0	0
9040	UBE2M	55521	TRIM36	0	0	1	1	pACTBD-B	1	NA	NA	0	0	0
7334	UBE2N	55521	TRIM36	0	1	1	1	pACTBD-B	1	-4.354	0	0	0	0
7335	UBE2V1	55521	TRIM36	0	0	1	1	pACTBD-B	1	-4.347	0	0	0	0
7336	UBE2V2	55521	TRIM36	0	0	1	1	pACTBD-B	1	-4.347	0	0	0	0
27338	UBE2S	55521	TRIM36	0	0	1	1	pACTBD-B	1	NA	NA	0	0	0
997	CDC34	55521	TRIM36	0	0	1	1	pACTBD-B	1	-7.482	0	0	0	0
3093	HIP2	55521	TRIM36	0	0	1	1	pACTBD-B	1	-5.419	0	0	0	0
54926	UBE2R2	55521	TRIM36	0	0	1	1	pACTBD-B	1	-6.582	0	0	0	0
51465	UBE2J1	55521	TRIM36	0	0	1	1	pACTBD-B	1	-6.318	0	0	0	0
118424	UBE2J2	55521	TRIM36	0	0	1	1	pACTBD-B	1	-5.135	0	0	0	0
55284	UBE2W	55521	TRIM36	0	0	1	2	pACTBD-B	1	-8.791	0	0	0	0
7325	UBE2E2	55521	TRIM36	0	0	1	1	pACTBD-B	1	-6.949	0	0	0	0
55293	UEVLD	55521	TRIM36	0	0	1	2	pACTBD-B	1	NA	NA	0	0	0
65264	UBE2Z	55521	TRIM36	0	0	1	2	pACTBD-B	1	NA	NA	0	0	0
64400	AKTIP	55521	TRIM36	0	0	1	1	pACTBD-B	1	-3.493	0	0	0	0
63893	UBE2O	55521	TRIM36	0	0	1	1	pACTBD-B	1	-4.196	0	0	0	0
55585	UBE2Q1	55521	TRIM36	0	0	1	1	pACTBD-B	1	-3.682	0	0	0	0
29089	UBE2T	55521	TRIM36	0	0	1	1	pACTBD-B	1	-8.417	0	0	0	0
140739	UBE2F	55521	TRIM36	0	0	1	1	pACTBD-B	1	NA	NA	0	0	0
57448	BIRC6	55521	TRIM36	0	0	1	1	pACTBD-B	1	-4.336	0	0	0	0
148581	UBE2U	55521	TRIM36	0	0	1	1	pACTBD-B	1	NA	NA	0	0	0
340561	UBE2DNL	55521	TRIM36	0	0	1	1	pACTBD-B	1	NA	NA	0	0	0
92912	UBE2Q2	55521	TRIM36	0	0	1	1	pACTBD-B	1	-3.682	0	0	0	0
7251	TSG101	55521	TRIM36	0	0	1	1	pACTBD-B	1	3.21	0	0	0	0
7319	UBE2A	10193	RNF41	0	0	1	1	pACTBD-B	1	-0.329	1	0	0	0
7320	UBE2B	10193	RNF41	0	0	1	1	pACTBD-B	1	-4.262	1	0	0	0
11065	UBE2C	10193	RNF41	0	0	1	1	pACTBD-B	1	-3.074	1	0	0	0
7321	UBE2D1	10193	RNF41	0	0	1	1	pACTBD-B	1	-7.703	0	0	0	0
7322	UBE2D2	10193	RNF41	0	0	1	1	pACTBD-B	1	-7.789	0	0	0	0
7323	UBE2D3	10193	RNF41	0	0	1	1	pACTBD-B	1	-6.443	0	0	0	0
51619	UBE2D4	10193	RNF41	0	0	1	1	pACTBD-B	1	-6.405	0	0	0	0
7324	UBE2E1	10193	RNF41	0	0	1	1	pACTBD-B	1	-6.189	0	0	0	0
10477	UBE2E3	10193	RNF41	0	0	1	1	pACTBD-B	1	-7.033	0	0	0	0
7326	UBE2G1	10193	RNF41	0	0	1	1	pACTBD-B	1	NA	NA	0	0	0
7327	UBE2G2	10193	RNF41	0	NA	0	0	NA	1	NA	NA	0	0	0
7328	UBE2H	10193	RNF41	0	0	1	1	pACTBD-B	1	-5.543	0	0	0	0
7329	UBE2I	10193	RNF41	0	0	1	2	pACTBD-B	1	-2.354	1	0	0	0
7332	UBE2L3	10193	RNF41	0	0	1	2	pACTBD-B	1	-6.733	1	0	0	0
9246	UBE2L6	10193	RNF41	0	0	1	1	pACTBD-B	1	-8.875	1	0	0	0
9040	UBE2M	10193	RNF41	0	0	1	1	pACTBD-B	1	NA	NA	0	0	0
7334	UBE2N	10193	RNF41	0	0	1	1	pACTBD-B	1	-3.834	1	0	0	1
7335	UBE2V1	10193	RNF41	0	0	1	1	pACTBD-B	1	6.102	1	0	0	0
7336	UBE2V2	10193	RNF41	0	0	1	1	pACTBD-B	1	6.102	1	0	0	0
27338	UBE2S	10193	RNF41	0	0	1	1	pACTBD-B	1	NA	NA	0	0	0
997	CDC34	10193	RNF41	0	0	1	1	pACTBD-B	1	-2.372	1	0	0	0
3093	HIP2	10193	RNF41	0	4	1	1	pACTBD-B	1	-6.749	0	0	0	0
54926	UBE2R2	10193	RNF41	0	0	1	1	pACTBD-B	1	2.017	1	0	0	0
51465	UBE2J1	10193	RNF41	0	0	1	1	pACTBD-B	1	-1.708	1	0	0	0
118424	UBE2J2	10193	RNF41	0	0	1	1	pACTBD-B	1	-8.325	0	0	0	0
55284	UBE2W	10193	RNF41	0	0	1	2	pACTBD-B	1	-8.601	0	0	0	0
7325	UBE2E2	10193	RNF41	0	0	1	1	pACTBD-B	1	-7.249	0	0	0	0
55293	UEVLD	10193	RNF41	0	0	1	2	pACTBD-B	1	NA	NA	0	0	0
65264	UBE2Z	10193	RNF41	0	0	1	2	pACTBD-B	1	NA	NA	0	0	0
64400	AKTIP	10193	RNF41	0	0	1	1	pACTBD-B	1	-5.133	1	0	0	0
63893	UBE2O	10193	RNF41	0	0	1	1	pACTBD-B	1	-0.956	1	0	0	0
55585	UBE2Q1	10193	RNF41	0	0	1	1	pACTBD-B	1	-4.492	0	0	0	0
29089	UBE2T	10193	RNF41	0	0	1	1	pACTBD-B	1	-8.587	0	0	0	0
140739	UBE2F	10193	RNF41	0	0	1	1	pACTBD-B	1	NA	NA	0	0	0
57448	BIRC6	10193	RNF41	0	0	1	1	pACTBD-B	1	-5.126	1	0	0	0
148581	UBE2U	10193	RNF41	0	0	1	1	pACTBD-B	1	NA	NA	0	0	0
340561	UBE2DNL	10193	RNF41	0	0	1	1	pACTBD-B	1	NA	NA	0	0	0
92912	UBE2Q2	10193	RNF41	0	0	1	1	pACTBD-B	1	-4.492	0	0	0	0
7251	TSG101	10193	RNF41	0	5	1	1	pACTBD-B	1	5.67	1	0	0	0
7319	UBE2A	79594	C1orf166	0	0	1	1	pACTBD-B	1	NA	NA	0	0	0
7320	UBE2B	79594	C1orf166	0	0	1	1	pACTBD-B	1	NA	NA	0	0	0
11065	UBE2C	79594	C1orf166	0	0	1	1	pACTBD-B	1	NA	NA	0	0	0
7321	UBE2D1	79594	C1orf166	0	0	1	1	pACTBD-B	1	NA	NA	0	0	0
7322	UBE2D2	79594	C1orf166	0	0	1	1	pACTBD-B	1	NA	NA	0	0	0
7323	UBE2D3	79594	C1orf166	0	0	1	1	pACTBD-B	1	NA	NA	0	0	0
51619	UBE2D4	79594	C1orf166	0	0	1	1	pACTBD-B	1	NA	NA	0	0	0
7324	UBE2E1	79594	C1orf166	0	0	1	1	pACTBD-B	1	NA	NA	0	0	0
10477	UBE2E3	79594	C1orf166	0	0	1	1	pACTBD-B	1	NA	NA	0	0	0
7326	UBE2G1	79594	C1orf166	0	0	1	1	pACTBD-B	1	NA	NA	0	0	0
7327	UBE2G2	79594	C1orf166	0	NA	0	0	NA	1	NA	NA	0	0	0
7328	UBE2H	79594	C1orf166	0	0	1	1	pACTBD-B	1	NA	NA	0	0	0
7329	UBE2I	79594	C1orf166	0	0	1	2	pACTBD-B	1	NA	NA	0	0	0
7332	UBE2L3	79594	C1orf166	0	0	1	2	pACTBD-B	1	NA	NA	0	0	0
9246	UBE2L6	79594	C1orf166	0	0	1	1	pACTBD-B	1	NA	NA	0	0	0
9040	UBE2M	79594	C1orf166	0	0	1	1	pACTBD-B	1	NA	NA	0	0	0
7334	UBE2N	79594	C1orf166	0	0	1	1	pACTBD-B	1	NA	NA	0	0	0
7335	UBE2V1	79594	C1orf166	0	0	1	1	pACTBD-B	1	NA	NA	0	0	0
7336	UBE2V2	79594	C1orf166	0	0	1	1	pACTBD-B	1	NA	NA	0	0	0
27338	UBE2S	79594	C1orf166	0	0	1	1	pACTBD-B	1	NA	NA	0	0	0
997	CDC34	79594	C1orf166	0	0	1	1	pACTBD-B	1	NA	NA	0	0	0
3093	HIP2	79594	C1orf166	0	0	1	1	pACTBD-B	1	NA	NA	0	0	0
54926	UBE2R2	79594	C1orf166	0	0	1	1	pACTBD-B	1	NA	NA	0	0	0
51465	UBE2J1	79594	C1orf166	0	0	1	1	pACTBD-B	1	NA	NA	0	0	0
118424	UBE2J2	79594	C1orf166	0	0	1	1	pACTBD-B	1	NA	NA	0	0	0
55284	UBE2W	79594	C1orf166	0	0	1	2	pACTBD-B	1	NA	NA	0	0	0
7325	UBE2E2	79594	C1orf166	0	0	1	1	pACTBD-B	1	NA	NA	0	0	0
55293	UEVLD	79594	C1orf166	0	0	1	2	pACTBD-B	1	NA	NA	0	0	0
65264	UBE2Z	79594	C1orf166	0	0	1	2	pACTBD-B	1	NA	NA	0	0	0
64400	AKTIP	79594	C1orf166	0	0	1	1	pACTBD-B	1	NA	NA	0	0	0
63893	UBE2O	79594	C1orf166	0	0	1	1	pACTBD-B	1	NA	NA	0	0	0
55585	UBE2Q1	79594	C1orf166	0	0	1	1	pACTBD-B	1	NA	NA	0	0	0
29089	UBE2T	79594	C1orf166	0	0	1	1	pACTBD-B	1	NA	NA	0	0	0
140739	UBE2F	79594	C1orf166	0	0	1	1	pACTBD-B	1	NA	NA	0	0	0
57448	BIRC6	79594	C1orf166	0	0	1	1	pACTBD-B	1	NA	NA	0	0	0
148581	UBE2U	79594	C1orf166	0	0	1	1	pACTBD-B	1	NA	NA	0	0	0
340561	UBE2DNL	79594	C1orf166	0	0	1	1	pACTBD-B	1	NA	NA	0	0	0
92912	UBE2Q2	79594	C1orf166	0	0	1	1	pACTBD-B	1	NA	NA	0	0	0
7251	TSG101	79594	C1orf166	0	0	1	1	pACTBD-B	1	NA	NA	0	0	0
7319	UBE2A	115123	MARCH3	0	0	1	1	pACTBD-B	1	-2.119	1	0	0	0
7320	UBE2B	115123	MARCH3	0	0	1	1	pACTBD-B	1	-6.772	1	0	0	0
11065	UBE2C	115123	MARCH3	0	0	1	1	pACTBD-B	1	-6.494	1	0	0	0
7321	UBE2D1	115123	MARCH3	0	0	1	1	pACTBD-B	1	-10.303	0	0	0	0
7322	UBE2D2	115123	MARCH3	0	4	1	1	pACTBD-B	1	-10.689	0	0	0	0
7323	UBE2D3	115123	MARCH3	0	4	1	1	pACTBD-B	1	-9.153	0	0	0	0
51619	UBE2D4	115123	MARCH3	0	4	1	1	pACTBD-B	1	-10.075	0	0	0	0
7324	UBE2E1	115123	MARCH3	0	4	1	1	pACTBD-B	1	-8.839	0	0	0	0
10477	UBE2E3	115123	MARCH3	0	0	1	1	pACTBD-B	1	-8.723	0	0	0	0
7326	UBE2G1	115123	MARCH3	0	0	1	1	pACTBD-B	1	NA	NA	0	0	0
7327	UBE2G2	115123	MARCH3	0	NA	0	0	NA	1	NA	NA	0	0	0
7328	UBE2H	115123	MARCH3	0	0	1	1	pACTBD-B	1	-8.723	0	0	0	1
7329	UBE2I	115123	MARCH3	0	0	1	2	pACTBD-B	1	-4.584	1	0	0	0
7332	UBE2L3	115123	MARCH3	0	0	1	2	pACTBD-B	1	-6.253	0	0	0	0
9246	UBE2L6	115123	MARCH3	0	0	1	1	pACTBD-B	1	-9.555	0	0	0	0
9040	UBE2M	115123	MARCH3	0	0	1	1	pACTBD-B	1	NA	NA	0	0	0
7334	UBE2N	115123	MARCH3	0	0	1	1	pACTBD-B	1	-5.554	1	0	0	0
7335	UBE2V1	115123	MARCH3	0	0	1	1	pACTBD-B	1	2.232	1	0	0	0
7336	UBE2V2	115123	MARCH3	0	0	1	1	pACTBD-B	1	2.232	1	0	0	0
27338	UBE2S	115123	MARCH3	0	0	1	1	pACTBD-B	1	NA	NA	0	0	0
997	CDC34	115123	MARCH3	0	0	1	1	pACTBD-B	1	-7.022	1	0	0	1
3093	HIP2	115123	MARCH3	0	4	1	1	pACTBD-B	1	-9.449	0	0	0	0
54926	UBE2R2	115123	MARCH3	0	0	1	1	pACTBD-B	1	-8.692	1	0	0	0
51465	UBE2J1	115123	MARCH3	0	0	1	1	pACTBD-B	1	-0.338	1	0	0	0
118424	UBE2J2	115123	MARCH3	0	0	1	1	pACTBD-B	1	-9.625	0	0	0	0
55284	UBE2W	115123	MARCH3	0	4	1	2	pACTBD-B	0	-10.591	0	0	0	0
7325	UBE2E2	115123	MARCH3	0	4	1	1	pACTBD-B	1	-8.389	0	0	0	0
55293	UEVLD	115123	MARCH3	0	0	1	2	pACTBD-B	1	NA	NA	0	0	0
65264	UBE2Z	115123	MARCH3	0	0	1	2	pACTBD-B	1	NA	NA	0	0	0
64400	AKTIP	115123	MARCH3	0	0	1	1	pACTBD-B	1	-10.563	1	0	0	0
63893	UBE2O	115123	MARCH3	0	0	1	1	pACTBD-B	1	-2.916	1	0	0	0
55585	UBE2Q1	115123	MARCH3	0	0	1	1	pACTBD-B	1	-6.482	0	0	0	0
29089	UBE2T	115123	MARCH3	0	0	1	1	pACTBD-B	1	-9.557	0	0	0	0
140739	UBE2F	115123	MARCH3	0	0	1	1	pACTBD-B	1	NA	NA	0	0	0
57448	BIRC6	115123	MARCH3	0	0	1	1	pACTBD-B	1	-4.836	1	0	0	0
148581	UBE2U	115123	MARCH3	0	0	1	1	pACTBD-B	1	NA	NA	0	0	0
340561	UBE2DNL	115123	MARCH3	0	0	1	1	pACTBD-B	1	NA	NA	0	0	0
92912	UBE2Q2	115123	MARCH3	0	0	1	1	pACTBD-B	1	-6.482	0	0	0	0
7251	TSG101	115123	MARCH3	0	0	1	1	pACTBD-B	1	3.74	1	0	0	0
7319	UBE2A	89970	RSPRY1	0	0	1	1	pACTBD-B	1	-8.059	0	0	0	0
7320	UBE2B	89970	RSPRY1	0	0	1	1	pACTBD-B	1	-4.762	0	0	0	0
11065	UBE2C	89970	RSPRY1	0	0	1	1	pACTBD-B	1	-8.144	1	0	0	0
7321	UBE2D1	89970	RSPRY1	0	0	1	1	pACTBD-B	1	-10.383	0	0	0	0
7322	UBE2D2	89970	RSPRY1	0	4	1	1	pACTBD-B	1	-10.709	0	0	0	0
7323	UBE2D3	89970	RSPRY1	0	4	1	1	pACTBD-B	1	-10.463	0	0	0	0
51619	UBE2D4	89970	RSPRY1	0	0	1	1	pACTBD-B	1	-10.385	0	0	0	0
7324	UBE2E1	89970	RSPRY1	0	0	1	1	pACTBD-B	1	-10.119	0	0	0	0
10477	UBE2E3	89970	RSPRY1	0	0	1	1	pACTBD-B	1	-9.163	0	0	0	0
7326	UBE2G1	89970	RSPRY1	0	0	1	1	pACTBD-B	1	NA	NA	0	0	0
7327	UBE2G2	89970	RSPRY1	0	NA	0	0	NA	1	NA	NA	0	0	0
7328	UBE2H	89970	RSPRY1	0	0	1	1	pACTBD-B	1	-9.883	0	0	0	0
7329	UBE2I	89970	RSPRY1	0	0	1	2	pACTBD-B	1	-5.974	0	0	0	0
7332	UBE2L3	89970	RSPRY1	0	0	1	2	pACTBD-B	1	-8.293	0	0	0	0
9246	UBE2L6	89970	RSPRY1	0	0	1	1	pACTBD-B	1	-9.575	0	0	0	0
9040	UBE2M	89970	RSPRY1	0	0	1	1	pACTBD-B	1	NA	NA	0	0	0
7334	UBE2N	89970	RSPRY1	0	0	1	1	pACTBD-B	1	-8.114	0	0	0	0
7335	UBE2V1	89970	RSPRY1	0	0	1	1	pACTBD-B	1	-2.417	0	0	0	0
7336	UBE2V2	89970	RSPRY1	0	0	1	1	pACTBD-B	1	-2.417	0	0	0	0
27338	UBE2S	89970	RSPRY1	0	0	1	1	pACTBD-B	1	NA	NA	0	0	0
997	CDC34	89970	RSPRY1	0	0	1	1	pACTBD-B	1	-10.112	0	0	0	0
3093	HIP2	89970	RSPRY1	0	0	1	1	pACTBD-B	1	-8.279	0	0	0	0
54926	UBE2R2	89970	RSPRY1	0	0	1	1	pACTBD-B	1	-8.632	0	0	0	0
51465	UBE2J1	89970	RSPRY1	0	0	1	1	pACTBD-B	1	-9.328	0	0	0	0
118424	UBE2J2	89970	RSPRY1	0	0	1	1	pACTBD-B	1	-9.115	0	0	0	0
55284	UBE2W	89970	RSPRY1	0	0	1	2	pACTBD-B	1	-11.221	0	0	0	0
7325	UBE2E2	89970	RSPRY1	0	0	1	1	pACTBD-B	1	-10.949	0	0	0	0
55293	UEVLD	89970	RSPRY1	0	0	1	2	pACTBD-B	1	NA	NA	0	0	0
65264	UBE2Z	89970	RSPRY1	0	0	1	2	pACTBD-B	1	NA	NA	0	0	0
64400	AKTIP	89970	RSPRY1	0	0	1	1	pACTBD-B	1	-7.233	0	0	0	0
63893	UBE2O	89970	RSPRY1	0	0	1	1	pACTBD-B	1	-6.166	0	0	0	0
55585	UBE2Q1	89970	RSPRY1	0	0	1	1	pACTBD-B	1	-3.492	0	0	0	0
29089	UBE2T	89970	RSPRY1	0	0	1	1	pACTBD-B	1	-9.037	0	0	0	0
140739	UBE2F	89970	RSPRY1	0	0	1	1	pACTBD-B	1	NA	NA	0	0	0
57448	BIRC6	89970	RSPRY1	0	0	1	1	pACTBD-B	1	-6.206	0	0	0	0
148581	UBE2U	89970	RSPRY1	0	0	1	1	pACTBD-B	1	NA	NA	0	0	0
340561	UBE2DNL	89970	RSPRY1	0	0	1	1	pACTBD-B	1	NA	NA	0	0	0
92912	UBE2Q2	89970	RSPRY1	0	0	1	1	pACTBD-B	1	-3.492	0	0	0	0
7251	TSG101	89970	RSPRY1	0	0	1	1	pACTBD-B	1	-0.419	1	0	0	0
7319	UBE2A	7703	PCGF2	0	0	1	1	pACTBD-B	1	0.89	1	0	0	0
7320	UBE2B	7703	PCGF2	0	0	1	1	pACTBD-B	1	0.587	1	0	0	0
11065	UBE2C	7703	PCGF2	0	0	1	1	pACTBD-B	1	-2.894	1	0	0	0
7321	UBE2D1	7703	PCGF2	0	0	1	1	pACTBD-B	1	-9.333	0	0	0	0
7322	UBE2D2	7703	PCGF2	0	0	1	1	pACTBD-B	1	-7.849	0	0	0	0
7323	UBE2D3	7703	PCGF2	0	0	1	1	pACTBD-B	1	-6.633	0	0	0	0
51619	UBE2D4	7703	PCGF2	0	0	1	1	pACTBD-B	1	-7.505	0	0	0	0
7324	UBE2E1	7703	PCGF2	0	0	1	1	pACTBD-B	1	-7.469	0	0	0	0
10477	UBE2E3	7703	PCGF2	0	0	1	1	pACTBD-B	1	-6.213	0	0	0	0
7326	UBE2G1	7703	PCGF2	0	0	1	1	pACTBD-B	1	NA	NA	0	0	0
7327	UBE2G2	7703	PCGF2	0	NA	0	0	NA	1	NA	NA	0	0	0
7328	UBE2H	7703	PCGF2	0	0	1	1	pACTBD-B	1	-5.963	0	0	0	0
7329	UBE2I	7703	PCGF2	0	0	1	2	pACTBD-B	1	-3.314	1	0	0	0
7332	UBE2L3	7703	PCGF2	0	0	1	2	pACTBD-B	1	-7.923	0	0	0	0
9246	UBE2L6	7703	PCGF2	0	0	1	1	pACTBD-B	1	-8.135	0	0	0	0
9040	UBE2M	7703	PCGF2	0	0	1	1	pACTBD-B	1	NA	NA	0	0	0
7334	UBE2N	7703	PCGF2	0	0	1	1	pACTBD-B	1	-1.634	1	0	0	0
7335	UBE2V1	7703	PCGF2	0	0	1	1	pACTBD-B	1	-1.077	1	0	0	0
7336	UBE2V2	7703	PCGF2	0	0	1	1	pACTBD-B	1	-1.077	1	0	0	0
27338	UBE2S	7703	PCGF2	0	0	1	1	pACTBD-B	1	NA	NA	0	0	0
997	CDC34	7703	PCGF2	0	0	1	1	pACTBD-B	1	-2.632	1	0	0	0
3093	HIP2	7703	PCGF2	0	0	1	1	pACTBD-B	1	-5.759	0	0	0	0
54926	UBE2R2	7703	PCGF2	0	0	1	1	pACTBD-B	1	-2.752	1	0	0	0
51465	UBE2J1	7703	PCGF2	0	0	1	1	pACTBD-B	1	-1.358	1	0	0	0
118424	UBE2J2	7703	PCGF2	0	0	1	1	pACTBD-B	1	-7.635	0	0	0	0
55284	UBE2W	7703	PCGF2	0	0	1	2	pACTBD-B	1	-8.541	0	0	0	0
7325	UBE2E2	7703	PCGF2	0	0	1	1	pACTBD-B	1	-8.809	0	0	0	0
55293	UEVLD	7703	PCGF2	0	0	1	2	pACTBD-B	1	NA	NA	0	0	0
65264	UBE2Z	7703	PCGF2	0	0	1	2	pACTBD-B	1	NA	NA	0	0	0
64400	AKTIP	7703	PCGF2	0	0	1	1	pACTBD-B	1	-0.413	1	0	0	0
63893	UBE2O	7703	PCGF2	0	0	1	1	pACTBD-B	1	-2.916	1	0	0	0
55585	UBE2Q1	7703	PCGF2	0	0	1	1	pACTBD-B	1	-2.152	0	0	0	0
29089	UBE2T	7703	PCGF2	0	0	1	1	pACTBD-B	1	-10.947	0	0	0	0
140739	UBE2F	7703	PCGF2	0	0	1	1	pACTBD-B	1	NA	NA	0	0	0
57448	BIRC6	7703	PCGF2	0	0	1	1	pACTBD-B	1	-3.016	1	0	0	0
148581	UBE2U	7703	PCGF2	0	0	1	1	pACTBD-B	1	NA	NA	0	0	0
340561	UBE2DNL	7703	PCGF2	0	0	1	1	pACTBD-B	1	NA	NA	0	0	0
92912	UBE2Q2	7703	PCGF2	0	0	1	1	pACTBD-B	1	-2.152	0	0	0	0
7251	TSG101	7703	PCGF2	0	0	1	1	pACTBD-B	1	5.45	1	0	0	0
7319	UBE2A	196403	DTX3	0	0	1	1	pACTBD-B	1	-4.189	0	0	0	0
7320	UBE2B	196403	DTX3	0	0	1	1	pACTBD-B	1	-4.782	0	0	0	0
11065	UBE2C	196403	DTX3	0	0	1	1	pACTBD-B	1	-7.664	0	0	0	0
7321	UBE2D1	196403	DTX3	0	5	1	1	pACTBD-B	1	-8.253	0	0	0	0
7322	UBE2D2	196403	DTX3	0	5	1	1	pACTBD-B	1	-8.229	0	0	0	0
7323	UBE2D3	196403	DTX3	0	5	1	1	pACTBD-B	1	-9.113	0	0	0	0
51619	UBE2D4	196403	DTX3	0	5	1	1	pACTBD-B	1	-8.405	0	0	0	0
7324	UBE2E1	196403	DTX3	0	4	1	1	pACTBD-B	1	-9.949	0	0	0	0
10477	UBE2E3	196403	DTX3	0	4	1	1	pACTBD-B	1	-7.993	0	0	0	0
7326	UBE2G1	196403	DTX3	0	0	1	1	pACTBD-B	1	NA	NA	0	0	0
7327	UBE2G2	196403	DTX3	0	NA	0	0	NA	1	NA	NA	0	0	0
7328	UBE2H	196403	DTX3	0	4	1	1	pACTBD-B	1	-6.103	0	0	0	0
7329	UBE2I	196403	DTX3	0	0	1	2	pACTBD-B	1	-4.234	0	0	0	0
7332	UBE2L3	196403	DTX3	0	4	1	2	pACTBD-B	0	-6.893	0	0	0	0
9246	UBE2L6	196403	DTX3	0	5	1	1	pACTBD-B	1	-8.085	0	0	0	0
9040	UBE2M	196403	DTX3	0	0	1	1	pACTBD-B	1	NA	NA	0	0	0
7334	UBE2N	196403	DTX3	0	0	1	1	pACTBD-B	1	-7.324	0	0	0	0
7335	UBE2V1	196403	DTX3	0	4	1	1	pACTBD-B	1	-3.117	0	0	0	0
7336	UBE2V2	196403	DTX3	0	0	1	1	pACTBD-B	1	-3.117	0	0	0	0
27338	UBE2S	196403	DTX3	0	0	1	1	pACTBD-B	1	NA	NA	0	0	0
997	CDC34	196403	DTX3	0	0	1	1	pACTBD-B	1	-7.612	0	0	0	0
3093	HIP2	196403	DTX3	0	5	1	1	pACTBD-B	1	-5.619	0	0	0	0
54926	UBE2R2	196403	DTX3	0	0	1	1	pACTBD-B	1	-8.172	0	0	0	0
51465	UBE2J1	196403	DTX3	0	0	1	1	pACTBD-B	1	-7.428	0	0	0	0
118424	UBE2J2	196403	DTX3	0	0	1	1	pACTBD-B	1	-7.705	0	0	0	0
55284	UBE2W	196403	DTX3	0	4	1	2	pACTBD-B	1	-8.761	0	0	0	0
7325	UBE2E2	196403	DTX3	0	4	1	1	pACTBD-B	1	-8.779	0	0	0	0
55293	UEVLD	196403	DTX3	0	4	1	2	pACTBD-B	0	NA	NA	0	0	0
65264	UBE2Z	196403	DTX3	0	0	1	2	pACTBD-B	1	NA	NA	0	0	0
64400	AKTIP	196403	DTX3	0	0	1	1	pACTBD-B	1	-7.743	0	0	0	0
63893	UBE2O	196403	DTX3	0	0	1	1	pACTBD-B	1	-5.136	0	0	0	0
55585	UBE2Q1	196403	DTX3	0	0	1	1	pACTBD-B	1	-6.912	0	0	0	0
29089	UBE2T	196403	DTX3	0	0	1	1	pACTBD-B	1	-9.497	0	0	0	0
140739	UBE2F	196403	DTX3	0	0	1	1	pACTBD-B	1	NA	NA	0	0	0
57448	BIRC6	196403	DTX3	0	0	1	1	pACTBD-B	1	-6.626	0	0	0	0
148581	UBE2U	196403	DTX3	0	0	1	1	pACTBD-B	1	NA	NA	0	0	0
340561	UBE2DNL	196403	DTX3	0	4	1	1	pACTBD-B	1	NA	NA	0	0	0
92912	UBE2Q2	196403	DTX3	0	0	1	1	pACTBD-B	1	-6.912	0	0	0	0
7251	TSG101	196403	DTX3	0	0	1	1	pACTBD-B	1	-1.399	0	0	0	0
7319	UBE2A	220972	MARCH8	0	0	1	1	pACTBD-B	1	NA	NA	0	0	0
7320	UBE2B	220972	MARCH8	0	0	1	1	pACTBD-B	1	NA	NA	0	0	0
11065	UBE2C	220972	MARCH8	0	0	1	1	pACTBD-B	1	NA	NA	0	0	0
7321	UBE2D1	220972	MARCH8	0	0	1	1	pACTBD-B	1	NA	NA	0	0	0
7322	UBE2D2	220972	MARCH8	0	0	1	1	pACTBD-B	1	NA	NA	0	0	0
7323	UBE2D3	220972	MARCH8	0	0	1	1	pACTBD-B	1	NA	NA	0	0	0
51619	UBE2D4	220972	MARCH8	0	0	1	1	pACTBD-B	1	NA	NA	0	0	0
7324	UBE2E1	220972	MARCH8	0	0	1	1	pACTBD-B	1	NA	NA	0	0	0
10477	UBE2E3	220972	MARCH8	0	0	1	1	pACTBD-B	1	NA	NA	0	0	0
[truncated: 3,924 more rows]

## Sheet: data for known intxns
				Y2H Library	Matrix Data-------------------------------------------------------------------------------					THM Data---------------		Database Data------------------------------
e2Id	e2Name	e3Id	e3Name	library	intxnScore	tested	testNumber	preyVector	consistent	freeEnergy	VDW	knownHuman	interologue	predicted
7322	UBE2D2	867	CBL	0	0	1	1	pACTBD-B	1	NA	NA	1	0	0
7324	UBE2E1	867	CBL	0	0	1	1	pACTBD-B	1	NA	NA	1	0	0
7326	UBE2G1	867	CBL	0	0	1	1	pACTBD-B	1	NA	NA	1	0	0
7327	UBE2G2	867	CBL	0	NA	0	0	NA	1	NA	NA	1	0	0
7332	UBE2L3	867	CBL	0	0	1	2	pACTBD-B	1	NA	NA	1	0	0
7323	UBE2D3	7189	TRAF6	0	4	1	2	pACTBD-B	1	-10.693	0	1	0	0
7332	UBE2L3	7189	TRAF6	0	0	1	4	pACTBD-B	1	-9.783	0	1	0	0
9040	UBE2M	7189	TRAF6	0	0	1	2	pACTBD-B	1	NA	NA	1	0	0
7336	UBE2V2	7189	TRAF6	0	0	1	2	pACTBD-B	1	-2.377	0	1	0	0
7319	UBE2A	56852	RAD18	0	5	1	2	pACTBD-B	1	-8.319	0	1	1	0
7320	UBE2B	56852	RAD18	1	5	1	2	pACTBD-B	1	-8.612	0	1	1	0
51465	UBE2J1	329	BIRC2	0	0	1	1	pACTBD-B	1	NA	NA	1	0	0
7319	UBE2A	4193	MDM2	0	0	1	2	pACTBD-B	1	NA	NA	1	0	0
7251	TSG101	4193	MDM2	0	0	1	2	pACTBD-B	1	NA	NA	1	0	0
7321	UBE2D1	55658	RNF126	1	5	1	1	pACTBD-B	1	NA	NA	1	0	0
7323	UBE2D3	55658	RNF126	1	5	1	1	pACTBD-B	1	NA	NA	1	0	0
51619	UBE2D4	55658	RNF126	1	5	1	1	pACTBD-B	1	NA	NA	1	0	0
9040	UBE2M	26001	RNF167	0	0	1	1	pACTBD-B	1	NA	NA	1	0	0
7321	UBE2D1	22888	UBOX5	0	5	1	1	pACTBD-B	1	-6.793	0	1	0	0
7324	UBE2E1	22888	UBOX5	0	4	1	1	pACTBD-B	1	-6.459	0	1	0	0
10477	UBE2E3	22888	UBOX5	0	0	1	1	pACTBD-B	1	-6.453	0	1	0	0
7332	UBE2L3	22888	UBOX5	0	5	1	2	pACTBD-B	1	-6.023	0	1	0	0
7325	UBE2E2	22888	UBOX5	0	4	1	1	pACTBD-B	1	-6.619	0	1	0	0
7322	UBE2D2	6048	RNF5	1	5	1	3	pACTBD-B|pGAD|pACTBE-B	1	-8.939	0	1	0	0
7323	UBE2D3	6048	RNF5	1	5	1	3	pACTBD-B|pGAD|pACTBE-B	1	-8.963	0	1	0	0
7324	UBE2E1	6048	RNF5	0	5	1	3	pACTBD-B|pGAD|pACTBE-B	1	-8.739	0	1	0	0
10477	UBE2E3	6048	RNF5	0	5	1	3	pACTBD-B|pGAD|pACTBE-B	1	-9.013	1	1	0	0
51465	UBE2J1	6048	RNF5	0	0	1	3	pACTBD-B|pGAD|pACTBE-B	1	-2.638	1	1	0	0
7329	UBE2I	9618	TRAF4	0	0	1	2	pACTBD-B	1	-3.414	1	1	0	0
9246	UBE2L6	9810	RNF40	0	0	1	1	pACTBD-B	1	-6.655	0	1	0	0
7324	UBE2E1	9604	RNF14	0	5	1	1	pACTBD-B	1	-7.799	0	1	0	0
7251	TSG101	90678	LRSAM1	0	5	1	1	pACTBD-B	1	NA	NA	1	0	0
7321	UBE2D1	26994	RNF11	1	5	1	1	pACTBD-B	1	-8.903	1	1	0	0
7322	UBE2D2	26994	RNF11	1	5	1	1	pACTBD-B	1	-6.829	1	1	0	0
51619	UBE2D4	26994	RNF11	0	5	1	1	pACTBD-B	1	-9.615	1	1	0	0
7334	UBE2N	26994	RNF11	0	5	1	1	pACTBD-B	1	-7.404	1	1	0	0
7322	UBE2D2	267	AMFR	0	4	1	1	pACTBD-B	1	-10.979	0	1	0	0
7327	UBE2G2	267	AMFR	0	NA	0	0	NA	1	NA	NA	1	0	0
7321	UBE2D1	6477	SIAH1	0	4	1	1	pACTBD-B	1	NA	NA	1	0	0
7329	UBE2I	6477	SIAH1	0	0	1	2	pACTBD-B	1	NA	NA	1	0	0
7332	UBE2L3	10425	ARIH2	1	5	1	2	pGAD|pACTBE-B	1	NA	NA	1	1	0
7323	UBE2D3	672	BRCA1	0	1	1	1	pACTBE-B	1	-10.513	0	1	0	0
7332	UBE2L3	672	BRCA1	0	0	1	2	pACTBE-B	1	-9.443	0	1	0	0
7321	UBE2D1	151636	DTX3L	0	5	1	1	pGAD|pACTBE-B	1	-9.303	0	1	0	0
7322	UBE2D2	151636	DTX3L	0	5	1	1	pGAD|pACTBE-B	1	-11.519	0	1	0	0
7323	UBE2D3	151636	DTX3L	0	5	1	1	pGAD|pACTBE-B	1	-11.013	0	1	0	0
9246	UBE2L6	255488	RNF144B	0	5	1	1	pGAD|pACTBE-B	1	NA	NA	1	0	0
7321	UBE2D1	4194	MDM4	0	0	1	1	pGAD|pACTBE-B	1	NA	NA	1	0	0
7334	UBE2N	79589	RNF128	0	0	1	1	pGAD|pACTBE-B	1	NA	NA	1	0	0
7321	UBE2D1	56658	TRIM39	0	5	1	2	pGAD|pACTBE-B	1	NA	NA	1	0	0
7323	UBE2D3	56658	TRIM39	0	5	1	2	pGAD|pACTBE-B	1	NA	NA	1	0	0
51619	UBE2D4	56658	TRIM39	0	5	1	2	pGAD|pACTBE-B	1	NA	NA	1	0	0
7322	UBE2D2	9867	PJA2	0	0	1	1	pGAD	1	-9.659	1	1	0	0
7332	UBE2L3	9781	RNF144A	0	5	1	2	pGAD|pACTBE-B	1	NA	NA	1	0	0
7324	UBE2E1	9025	RNF8	0	0	1	1	pACTBE-B	1	-9.039	1	1	0	0
10477	UBE2E3	9025	RNF8	0	0	1	1	pACTBE-B	1	-9.653	1	1	0	0
7325	UBE2E2	9025	RNF8	0	0	1	1	pACTBE-B	1	-7.889	1	1	0	0
9246	UBE2L6	7706	TRIM25	0	0	1	1	pACTBE-B	1	-8.285	0	1	1	0
7322	UBE2D2	85363	TRIM5	0	4	1	1	pGAD|pACTBE-B	1	-10.359	0	1	0	0
51619	UBE2D4	113878	DTX2	0	NA	0	0	NA	NA	-11.195	0	1	0	0
