# Supplementary material for: Analysis of the human E2 ubiquitin conjugating enzyme protein interaction network
Source: HighWire-hosted journal article supplement (doi:10.1101/gr.093963.109), 2009-06-23
Supplement: Markson_et_al_Supp._File_12.xlsx [file Markson_et_al_Supp._File_12.xlsx]

## Sheet: GO-Biological Process
GO: Biological Process Ontology
E2 in Current Screen
GO Term	#genes with term in list	#genes in list without the term	#genes with the term, not in list	#genes, without term, not in list	p-Value	GO Term Description	Over / Under-represented in current list
GO:0006512	37	2	238	8134	6.51859e-54	ubiquitin cycle	overrepresented
GO:0006511	13	26	88	8284	3.06356e-16	ubiquitin-dependent protein catabolic process	overrepresented
GO:0000209	3	36	7	8365	1.0816e-05	protein polyubiquitination	overrepresented
GO:0006282	2	37	2	8370	0.00012497	regulation of DNA repair	overrepresented
GO:0006301	2	37	3	8369	0.000207672	postreplication repair	overrepresented
GO:0051092	2	37	15	8357	0.00272674	activation of NF-kappaB transcription factor	overrepresented
GO:0007288	1	38	0	8372	0.00463679	sperm axoneme assembly	overrepresented
GO:0019941	1	38	0	8372	0.00463679	modification-dependent protein catabolic process	overrepresented
GO:0008054	1	38	1	8371	0.00925262	cyclin catabolic process	overrepresented
GO:0032020	1	38	1	8371	0.00925262	ISG15-protein conjugation	overrepresented
GO:0031398	1	38	2	8370	0.0138476	positive regulation of protein ubiquitination	overrepresented
GO:0031536	1	38	2	8370	0.0138476	positive regulation of exit from mitosis	overrepresented
GO:0045739	1	38	2	8370	0.0138476	positive regulation of DNA repair	overrepresented
GO:0016567	2	37	39	8333	0.0153296	protein ubiquitination	overrepresented
GO:0006100	1	38	3	8369	0.0184218	tricarboxylic acid cycle intermediate metabolic process	overrepresented
GO:0007051	1	38	8	8364	0.0409845	spindle organization and biogenesis	overrepresented
GO:0001558	2	37	71	8301	0.0447876	regulation of cell growth	overrepresented
GO:0007165	0	39	1047	7325	0.0120025	signal transduction	underrepresented
GO:0006350	0	39	914	7458	0.018493	transcription	underrepresented
RINGS in Current Screen
GO Term	#genes with term in list	#genes in list without the term	#genes with the term, not in list	#genes, without term, not in list	p-Value	GO Term Description	Over / Under-represented in current list
GO:0006512	49	47	227	8099	3.97209e-48	ubiquitin cycle	overrepresented
GO:0006512	49	47	227	8099	3.97209e-48	ubiquitin cycle	overrepresented
GO:0016567	7	89	34	8292	3.28478e-07	protein ubiquitination	overrepresented
GO:0000209	4	92	7	8319	4.92145e-06	protein polyubiquitination	overrepresented
GO:0016574	3	93	3	8323	2.80045e-05	histone ubiquitination	overrepresented
GO:0042981	7	89	85	8241	7.97842e-05	regulation of apoptosis	overrepresented
GO:0006916	7	89	120	8206	0.000588907	anti-apoptosis	overrepresented
GO:0006511	6	90	96	8230	0.00104688	ubiquitin-dependent protein catabolic process	overrepresented
GO:0042787	2	94	3	8323	0.00125745	protein ubiquitination during ubiquitin-dependent protein catabolic process	overrepresented
GO:0043123	5	91	76	8250	0.00224217	positive regulation of I-kappaB kinase/NF-kappaB cascade	overrepresented
GO:0000278	2	94	5	8321	0.0026016	mitotic cell cycle	overrepresented
GO:0016573	2	94	7	8319	0.00439406	histone acetylation	overrepresented
GO:0007031	2	94	8	8318	0.00545194	peroxisome organization and biogenesis	overrepresented
GO:0045893	4	92	61	8265	0.00631294	positive regulation of transcription, DNA-dependent	overrepresented
GO:0030521	3	93	31	8295	0.00664997	androgen receptor signaling pathway	overrepresented
GO:0006978	1	95	0	8326	0.0113987	DNA damage response, signal transduction by p53 class mediator resulting in transcription of p21 class mediator	overrepresented
GO:0009048	1	95	0	8326	0.0113987	dosage compensation, by inactivation of X chromosome	overrepresented
GO:0030323	1	95	0	8326	0.0113987	respiratory tube development	overrepresented
GO:0030578	1	95	0	8326	0.0113987	PML body organization and biogenesis	overrepresented
GO:0031065	1	95	0	8326	0.0113987	positive regulation of histone deacetylation	overrepresented
GO:0031396	1	95	0	8326	0.0113987	regulation of protein ubiquitination	overrepresented
GO:0045023	1	95	0	8326	0.0113987	G0 to G1 transition	overrepresented
GO:0045717	1	95	0	8326	0.0113987	negative regulation of fatty acid biosynthetic process	overrepresented
GO:0046600	1	95	0	8326	0.0113987	negative regulation of centriole replication	overrepresented
GO:0051865	1	95	0	8326	0.0113987	protein autoubiquitination	overrepresented
GO:0006915	8	88	267	8059	0.0129557	apoptosis	overrepresented
GO:0006281	5	91	123	8203	0.0152526	DNA repair	overrepresented
GO:0006977	1	95	1	8325	0.0226688	DNA damage response, signal transduction by p53 class mediator resulting in cell cycle arrest	overrepresented
GO:0016558	1	95	1	8325	0.0226688	protein import into peroxisome matrix	overrepresented
GO:0009952	2	94	22	8304	0.0301576	anterior/posterior pattern formation	overrepresented
GO:0009948	1	95	2	8324	0.0338118	anterior/posterior axis specification	overrepresented
GO:0031398	1	95	2	8324	0.0338118	positive regulation of protein ubiquitination	overrepresented
GO:0045739	1	95	2	8324	0.0338118	positive regulation of DNA repair	overrepresented
GO:0006461	4	92	105	8221	0.0355956	protein complex assembly	overrepresented
GO:0002726	1	95	3	8323	0.044829	positive regulation of T cell cytokine production	overrepresented
GO:0006510	1	95	3	8323	0.044829	ATP-dependent proteolysis	overrepresented
GO:0006980	1	95	3	8323	0.044829	redox signal response	overrepresented
GO:0007098	1	95	3	8323	0.044829	centrosome cycle	overrepresented
GO:0007340	1	95	3	8323	0.044829	acrosome reaction	overrepresented
GO:0007379	1	95	3	8323	0.044829	segment specification	overrepresented
GO:0042176	1	95	3	8323	0.044829	regulation of protein catabolic process	overrepresented
GO:0051726	1	95	3	8323	0.044829	regulation of cell cycle	overrepresented
GO:0000122	4	92	115	8211	0.0466794	negative regulation of transcription from RNA polymerase II promoter	overrepresented
GO:0006468	0	96	441	7885	0.0097286	protein amino acid phosphorylation	underrepresented
GO:0007155	0	96	359	7967	0.0357558	cell adhesion	underrepresented
First neighbours of E2/RINGs in human interactome
GO Term	#genes with term in list	#genes in list without the term	#genes with the term, not in list	#genes, without term, not in list	p-Value	GO Term Description	Over / Under-represented in current list
GO:0006512	89	1024	180	7124	1.18345e-17	ubiquitin cycle	overrepresented
GO:0007049	100	1013	286	7018	8.5038e-12	cell cycle	overrepresented
GO:0006511	38	1075	63	7241	4.71938e-10	ubiquitin-dependent protein catabolic process	overrepresented
GO:0006350	179	934	736	6568	1.10106e-08	transcription	overrepresented
GO:0008629	11	1102	2	7302	1.25016e-08	induction of apoptosis by intracellular signals	overrepresented
GO:0006281	40	1073	89	7215	1.07723e-07	DNA repair	overrepresented
GO:0006468	97	1016	344	6960	2.23479e-07	protein amino acid phosphorylation	overrepresented
GO:0006412	46	1067	121	7183	6.76813e-07	translation	overrepresented
GO:0007050	22	1091	46	7258	3.59126e-05	cell cycle arrest	overrepresented
GO:0043123	25	1088	56	7248	3.64135e-05	positive regulation of I-kappaB kinase/NF-kappaB cascade	overrepresented
GO:0006915	60	1053	214	7090	5.69442e-05	apoptosis	overrepresented
GO:0006607	8	1105	5	7299	6.3382e-05	NLS-bearing substrate import into nucleus	overrepresented
GO:0000082	13	1100	18	7286	7.21745e-05	G1/S transition of mitotic cell cycle	overrepresented
GO:0007131	9	1104	8	7296	0.000107347	meiotic recombination	overrepresented
GO:0006164	7	1106	4	7300	0.000140948	purine nucleotide biosynthetic process	overrepresented
GO:0019221	13	1100	20	7284	0.000155343	cytokine and chemokine mediated signaling pathway	overrepresented
GO:0000079	13	1100	21	7283	0.000221383	regulation of cyclin-dependent protein kinase activity	overrepresented
GO:0051258	10	1103	12	7292	0.000224444	protein polymerization	overrepresented
GO:0006260	27	1086	72	7232	0.000238368	DNA replication	overrepresented
GO:0006916	32	1081	95	7209	0.000280138	anti-apoptosis	overrepresented
GO:0006268	7	1106	5	7299	0.000299666	DNA unwinding during replication	overrepresented
GO:0050852	7	1106	5	7299	0.000299666	T cell receptor signaling pathway	overrepresented
GO:0006302	6	1107	3	7301	0.000310235	double-strand break repair	overrepresented
GO:0006355	181	932	898	6406	0.000359336	regulation of transcription, DNA-dependent	overrepresented
GO:0045941	20	1093	48	7256	0.000406443	positive regulation of transcription	overrepresented
GO:0043066	13	1100	23	7281	0.000427276	negative regulation of apoptosis	overrepresented
GO:0000074	45	1068	159	7145	0.000483813	regulation of progression through cell cycle	overrepresented
GO:0007242	55	1058	212	7092	0.000632445	intracellular signaling cascade	overrepresented
GO:0016925	5	1108	2	7302	0.000667899	protein sumoylation	overrepresented
GO:0043161	5	1108	2	7302	0.000667899	proteasomal ubiquitin-dependent protein catabolic process	overrepresented
GO:0046330	6	1107	4	7300	0.000688777	positive regulation of JNK cascade	overrepresented
GO:0006366	38	1075	132	7172	0.000845111	transcription from RNA polymerase II promoter	overrepresented
GO:0030521	12	1101	22	7282	0.000896508	androgen receptor signaling pathway	overrepresented
GO:0006357	35	1078	119	7185	0.00105726	regulation of transcription from RNA polymerase II promoter	overrepresented
GO:0006469	8	1105	10	7294	0.00116698	negative regulation of protein kinase activity	overrepresented
GO:0045944	30	1083	95	7209	0.00118178	positive regulation of transcription from RNA polymerase II promoter	overrepresented
GO:0018108	6	1107	5	7299	0.00134617	peptidyl-tyrosine phosphorylation	overrepresented
GO:0045579	4	1109	1	7303	0.0013611	positive regulation of B cell differentiation	overrepresented
GO:0045931	4	1109	1	7303	0.0013611	positive regulation of progression through mitotic cell cycle	overrepresented
GO:0045786	23	1090	67	7237	0.00145035	negative regulation of progression through cell cycle	overrepresented
GO:0000060	7	1106	8	7296	0.00169551	protein import into nucleus, translocation	overrepresented
GO:0006139	10	1103	18	7286	0.00215563	nucleobase, nucleoside, nucleotide and nucleic acid metabolic process	overrepresented
GO:0001779	3	1110	0	7304	0.00230673	natural killer cell differentiation	overrepresented
GO:0006312	3	1110	0	7304	0.00230673	mitotic recombination	overrepresented
GO:0006610	3	1110	0	7304	0.00230673	ribosomal protein import into nucleus	overrepresented
GO:0007006	3	1110	0	7304	0.00230673	mitochondrial membrane organization and biogenesis	overrepresented
GO:0010165	3	1110	0	7304	0.00230673	response to X-ray	overrepresented
GO:0031647	3	1110	0	7304	0.00230673	regulation of protein stability	overrepresented
GO:0051098	3	1110	0	7304	0.00230673	regulation of binding	overrepresented
GO:0000077	6	1107	6	7298	0.00239268	DNA damage checkpoint	overrepresented
GO:0006461	26	1087	83	7221	0.00241287	protein complex assembly	overrepresented
GO:0006974	9	1104	15	7289	0.00242881	response to DNA damage stimulus	overrepresented
GO:0030163	9	1104	15	7289	0.00242881	protein catabolic process	overrepresented
GO:0006284	8	1105	12	7292	0.00263309	base-excision repair	overrepresented
GO:0006413	8	1105	12	7292	0.00263309	translational initiation	overrepresented
GO:0006464	18	1095	48	7256	0.0026818	protein modification	overrepresented
GO:0042592	5	1108	4	7300	0.00318278	homeostatic process	overrepresented
GO:0008635	4	1109	2	7302	0.00365476	caspase activation via cytochrome c	overrepresented
GO:0046718	4	1109	2	7302	0.00365476	entry of virus into host cell	overrepresented
GO:0045892	14	1099	34	7270	0.00390205	negative regulation of transcription, DNA-dependent	overrepresented
GO:0000086	6	1107	7	7297	0.0039504	G2/M transition of mitotic cell cycle	overrepresented
GO:0030099	6	1107	7	7297	0.0039504	myeloid cell differentiation	overrepresented
GO:0030217	6	1107	7	7297	0.0039504	T cell differentiation	overrepresented
GO:0007249	7	1106	10	7294	0.00403179	I-kappaB kinase/NF-kappaB cascade	overrepresented
GO:0006306	5	1108	5	7299	0.00567679	DNA methylation	overrepresented
GO:0006414	6	1107	8	7296	0.00614828	translational elongation	overrepresented
GO:0006417	8	1105	15	7289	0.00712554	regulation of translation	overrepresented
GO:0000724	4	1109	3	7301	0.00763724	double-strand break repair via homologous recombination	overrepresented
GO:0007094	4	1109	3	7301	0.00763724	mitotic spindle checkpoint	overrepresented
GO:0007172	4	1109	3	7301	0.00763724	signal complex formation	overrepresented
GO:0050729	4	1109	3	7301	0.00763724	positive regulation of inflammatory response	overrepresented
GO:0050870	4	1109	3	7301	0.00763724	positive regulation of T cell activation	overrepresented
GO:0002726	3	1110	1	7303	0.00831399	positive regulation of T cell cytokine production	overrepresented
GO:0007095	3	1110	1	7303	0.00831399	mitotic G2 checkpoint	overrepresented
GO:0016202	3	1110	1	7303	0.00831399	regulation of striated muscle development	overrepresented
GO:0030889	3	1110	1	7303	0.00831399	negative regulation of B cell proliferation	overrepresented
GO:0007250	6	1107	9	7295	0.00911679	activation of NF-kappaB-inducing kinase	overrepresented
GO:0000723	5	1108	6	7298	0.00928564	telomere maintenance	overrepresented
GO:0007017	5	1108	6	7298	0.00928564	microtubule-based process	overrepresented
GO:0007169	18	1095	57	7247	0.00951545	transmembrane receptor protein tyrosine kinase signaling pathway	overrepresented
GO:0006333	9	1104	20	7284	0.01009	chromatin assembly or disassembly	overrepresented
GO:0006928	25	1088	91	7213	0.0122025	cell motility	overrepresented
GO:0006298	6	1107	10	7294	0.0129829	mismatch repair	overrepresented
GO:0001707	4	1109	4	7300	0.0136875	mesoderm formation	overrepresented
GO:0001836	4	1109	4	7300	0.0136875	release of cytochrome c from mitochondria	overrepresented
GO:0043433	4	1109	4	7300	0.0136875	negative regulation of transcription factor activity	overrepresented
GO:0007179	7	1106	14	7290	0.0149805	transforming growth factor beta receptor signaling pathway	overrepresented
GO:0007259	7	1106	14	7290	0.0149805	JAK-STAT cascade	overrepresented
GO:0006950	16	1097	50	7254	0.0156719	response to stress	overrepresented
GO:0008286	8	1105	18	7286	0.0158247	insulin receptor signaling pathway	overrepresented
GO:0000019	2	1111	0	7304	0.0174718	regulation of mitotic recombination	overrepresented
GO:0001823	2	1111	0	7304	0.0174718	mesonephros development	overrepresented
GO:0001960	2	1111	0	7304	0.0174718	negative regulation of cytokine and chemokine mediated signaling pathway	overrepresented
GO:0006168	2	1111	0	7304	0.0174718	adenine salvage	overrepresented
GO:0006288	2	1111	0	7304	0.0174718	base-excision repair, DNA ligation	overrepresented
GO:0008340	2	1111	0	7304	0.0174718	determination of adult life span	overrepresented
GO:0019218	2	1111	0	7304	0.0174718	regulation of steroid metabolic process	overrepresented
GO:0019724	2	1111	0	7304	0.0174718	B cell mediated immunity	overrepresented
GO:0019987	2	1111	0	7304	0.0174718	negative regulation of anti-apoptosis	overrepresented
GO:0030330	2	1111	0	7304	0.0174718	DNA damage response, signal transduction by p53 class mediator	overrepresented
GO:0045910	2	1111	0	7304	0.0174718	negative regulation of DNA recombination	overrepresented
GO:0046543	2	1111	0	7304	0.0174718	development of secondary female sexual characteristics	overrepresented
GO:0046544	2	1111	0	7304	0.0174718	development of secondary male sexual characteristics	overrepresented
GO:0048261	2	1111	0	7304	0.0174718	negative regulation of receptor mediated endocytosis	overrepresented
GO:0048340	2	1111	0	7304	0.0174718	paraxial mesoderm morphogenesis	overrepresented
GO:0051318	2	1111	0	7304	0.0174718	G1 phase	overrepresented
GO:0051583	2	1111	0	7304	0.0174718	dopamine uptake	overrepresented
GO:0051895	2	1111	0	7304	0.0174718	negative regulation of focal adhesion formation	overrepresented
GO:0051092	6	1107	11	7293	0.0178653	activation of NF-kappaB transcription factor	overrepresented
GO:0016567	11	1102	30	7274	0.0178735	protein ubiquitination	overrepresented
GO:0006275	3	1110	2	7302	0.0187433	regulation of DNA replication	overrepresented
GO:0042417	3	1110	2	7302	0.0187433	dopamine metabolic process	overrepresented
GO:0042771	3	1110	2	7302	0.0187433	DNA damage response, signal transduction by p53 class mediator resulting in induction of apoptosis	overrepresented
GO:0043029	3	1110	2	7302	0.0187433	T cell homeostasis	overrepresented
GO:0048305	3	1110	2	7302	0.0187433	immunoglobulin secretion	overrepresented
GO:0007126	8	1105	19	7285	0.0199501	meiosis	overrepresented
GO:0006310	11	1102	31	7273	0.0204353	DNA recombination	overrepresented
GO:0016573	4	1109	5	7299	0.0220914	histone acetylation	overrepresented
GO:0008285	31	1082	128	7176	0.0240833	negative regulation of cell proliferation	overrepresented
GO:0030036	17	1096	58	7246	0.0241193	actin cytoskeleton organization and biogenesis	overrepresented
GO:0008584	5	1108	9	7295	0.0286613	male gonad development	overrepresented
GO:0008625	5	1108	9	7295	0.0286613	induction of apoptosis via death domain receptors	overrepresented
GO:0051301	30	1083	126	7178	0.031203	cell division	overrepresented
GO:0007052	4	1109	6	7298	0.0330344	mitotic spindle organization and biogenesis	overrepresented
GO:0008630	4	1109	6	7298	0.0330344	DNA damage response, signal transduction resulting in induction of apoptosis	overrepresented
GO:0001782	3	1110	3	7301	0.0338319	B cell homeostasis	overrepresented
GO:0006265	3	1110	3	7301	0.0338319	DNA topological change	overrepresented
GO:0006349	3	1110	3	7301	0.0338319	imprinting	overrepresented
GO:0030838	3	1110	3	7301	0.0338319	positive regulation of actin filament polymerization	overrepresented
GO:0042254	3	1110	3	7301	0.0338319	ribosome biogenesis and assembly	overrepresented
GO:0043154	3	1110	3	7301	0.0338319	negative regulation of caspase activity	overrepresented
GO:0006325	5	1108	10	7294	0.0384335	establishment and/or maintenance of chromatin architecture	overrepresented
GO:0009952	7	1106	18	7286	0.0386967	anterior/posterior pattern formation	overrepresented
GO:0007498	6	1107	14	7290	0.0395953	mesoderm development	overrepresented
GO:0046777	11	1102	33	7271	0.0398949	protein amino acid autophosphorylation	overrepresented
GO:0006917	21	1092	83	7221	0.0409861	induction of apoptosis	overrepresented
GO:0042127	9	1104	26	7278	0.0413333	regulation of cell proliferation	overrepresented
GO:0016481	17	1096	62	7242	0.0427769	negative regulation of transcription	overrepresented
GO:0000075	4	1109	7	7297	0.0466051	cell cycle checkpoint	overrepresented
GO:0008632	4	1109	7	7297	0.0466051	apoptotic program	overrepresented
GO:0009314	4	1109	7	7297	0.0466051	response to radiation	overrepresented
GO:0000012	2	1111	1	7303	0.0478018	single strand break repair	overrepresented
GO:0001553	2	1111	1	7303	0.0478018	luteinization	overrepresented
GO:0006166	2	1111	1	7303	0.0478018	purine ribonucleoside salvage	overrepresented
GO:0006189	2	1111	1	7303	0.0478018	'de novo' IMP biosynthetic process	overrepresented
GO:0006435	2	1111	1	7303	0.0478018	threonyl-tRNA aminoacylation	overrepresented
GO:0006449	2	1111	1	7303	0.0478018	regulation of translational termination	overrepresented
GO:0006972	2	1111	1	7303	0.0478018	hyperosmotic response	overrepresented
GO:0007090	2	1111	1	7303	0.0478018	regulation of S phase of mitotic cell cycle	overrepresented
GO:0007183	2	1111	1	7303	0.0478018	SMAD protein complex assembly	overrepresented
GO:0010224	2	1111	1	7303	0.0478018	response to UV-B	overrepresented
GO:0016050	2	1111	1	7303	0.0478018	vesicle organization and biogenesis	overrepresented
GO:0016311	2	1111	1	7303	0.0478018	dephosphorylation	overrepresented
GO:0016447	2	1111	1	7303	0.0478018	somatic recombination of immunoglobulin gene segments	overrepresented
GO:0016458	2	1111	1	7303	0.0478018	gene silencing	overrepresented
GO:0030278	2	1111	1	7303	0.0478018	regulation of ossification	overrepresented
GO:0031503	2	1111	1	7303	0.0478018	protein complex localization	overrepresented
GO:0032026	2	1111	1	7303	0.0478018	response to magnesium ion	overrepresented
GO:0045638	2	1111	1	7303	0.0478018	negative regulation of myeloid cell differentiation	overrepresented
GO:0045647	2	1111	1	7303	0.0478018	negative regulation of erythrocyte differentiation	overrepresented
GO:0045817	2	1111	1	7303	0.0478018	positive regulation of global transcription from RNA polymerase II promoter	overrepresented
GO:0046325	2	1111	1	7303	0.0478018	negative regulation of glucose import	overrepresented
GO:0050678	2	1111	1	7303	0.0478018	regulation of epithelial cell proliferation	overrepresented
GO:0051023	2	1111	1	7303	0.0478018	regulation of immunoglobulin secretion	overrepresented
GO:0051209	2	1111	1	7303	0.0478018	release of sequestered calcium ion into cytosol	overrepresented
GO:0045165	6	1107	15	7289	0.0494412	cell fate commitment	overrepresented
GO:0006811	11	1102	263	7041	4.06288e-07	ion transport	underrepresented
GO:0007267	10	1103	245	7059	7.13231e-07	cell-cell signaling	underrepresented
GO:0007155	19	1094	340	6964	9.05482e-07	cell adhesion	underrepresented
GO:0007186	11	1102	238	7066	4.02501e-06	G-protein coupled receptor protein signaling pathway	underrepresented
GO:0007218	0	1113	52	7252	0.00137683	neuropeptide signaling pathway	underrepresented
GO:0007601	6	1107	122	7182	0.00224551	visual perception	underrepresented
GO:0007156	1	1112	61	7243	0.00233916	homophilic cell adhesion	underrepresented
GO:0007596	1	1112	63	7241	0.00239109	blood coagulation	underrepresented
GO:0051056	0	1113	41	7263	0.00466515	regulation of small GTPase mediated signal transduction	underrepresented
GO:0006813	4	1109	91	7213	0.00564602	potassium ion transport	underrepresented
GO:0001501	4	1109	90	7214	0.00564732	skeletal development	underrepresented
GO:0007586	0	1113	38	7266	0.00718016	digestion	underrepresented
GO:0006935	5	1108	100	7204	0.00823154	chemotaxis	underrepresented
GO:0006816	2	1111	65	7239	0.00982373	calcium ion transport	underrepresented
GO:0007187	0	1113	36	7268	0.0112691	G-protein signaling, coupled to cyclic nucleotide second messenger	underrepresented
GO:0050896	6	1107	104	7200	0.0149184	response to stimulus	underrepresented
GO:0007010	2	1111	58	7246	0.0199255	cytoskeleton organization and biogenesis	underrepresented
GO:0006118	11	1102	140	7164	0.0285266	electron transport	underrepresented
GO:0007275	58	1055	511	6793	0.0290842	multicellular organismal development	underrepresented
GO:0006817	2	1111	56	7248	0.0294697	phosphate transport	underrepresented
GO:0006486	0	1113	26	7278	0.0407091	protein amino acid glycosylation	underrepresented
GO:0035023	2	1111	52	7252	0.0409702	regulation of Rho protein signal transduction	underrepresented
GO:0006821	0	1113	27	7277	0.0415338	chloride transport	underrepresented
GO:0006958	0	1113	28	7276	0.0435063	complement activation, classical pathway	underrepresented
GO:0008277	0	1113	28	7276	0.0435063	regulation of G-protein coupled receptor protein signaling pathway	underrepresented
GO:0030198	0	1113	28	7276	0.0435063	extracellular matrix organization and biogenesis	underrepresented
First neighbours of the E2/RINGs from predicted/interlog data
GO Term	#genes with term in list	#genes in list without the term	#genes with the term, not in list	#genes, without term, not in list	p-Value	GO Term Description	Over / Under-represented in current list
GO:0007001	40	1930	25	6784	1.22542e-11	chromosome organization and biogenesis (sensu Eukaryota)	overrepresented
GO:0042981	49	1921	44	6765	2.10231e-10	regulation of apoptosis	overrepresented
GO:0006334	37	1933	28	6781	1.67101e-09	nucleosome assembly	overrepresented
GO:0007049	139	1831	253	6556	1.95682e-09	cell cycle	overrepresented
GO:0008380	76	1894	106	6703	4.41629e-09	RNA splicing	overrepresented
GO:0043123	42	1928	47	6762	2.50277e-07	positive regulation of I-kappaB kinase/NF-kappaB cascade	overrepresented
GO:0016568	44	1926	55	6754	1.18472e-06	chromatin modification	overrepresented
GO:0006281	53	1917	79	6730	4.31823e-06	DNA repair	overrepresented
GO:0006350	263	1707	678	6131	2.87132e-05	transcription	overrepresented
GO:0051301	59	1911	100	6709	2.96253e-05	cell division	overrepresented
GO:0006888	28	1942	32	6777	3.20274e-05	ER to Golgi vesicle-mediated transport	overrepresented
GO:0006338	18	1952	14	6795	3.40076e-05	chromatin remodeling	overrepresented
GO:0000398	18	1952	15	6794	5.91948e-05	nuclear mRNA splicing, via spliceosome	overrepresented
GO:0006397	58	1912	102	6707	7.3555e-05	mRNA processing	overrepresented
GO:0006917	42	1928	64	6745	8.4714e-05	induction of apoptosis	overrepresented
GO:0006260	41	1929	64	6745	0.000130648	DNA replication	overrepresented
GO:0006511	43	1927	69	6740	0.000136381	ubiquitin-dependent protein catabolic process	overrepresented
GO:0007516	7	1963	1	6808	0.000182811	hemocyte development (sensu Arthropoda)	overrepresented
GO:0030520	8	1962	2	6807	0.000183803	estrogen receptor signaling pathway	overrepresented
GO:0006310	20	1950	22	6787	0.000296867	DNA recombination	overrepresented
GO:0006099	12	1958	8	6801	0.000319121	tricarboxylic acid cycle	overrepresented
GO:0006259	12	1958	8	6801	0.000319121	DNA metabolic process	overrepresented
GO:0006289	12	1958	8	6801	0.000319121	nucleotide-excision repair	overrepresented
GO:0006357	56	1914	106	6703	0.000392845	regulation of transcription from RNA polymerase II promoter	overrepresented
GO:0007067	45	1925	78	6731	0.000426371	mitosis	overrepresented
GO:0000074	68	1902	139	6670	0.000509275	regulation of progression through cell cycle	overrepresented
GO:0006270	12	1958	9	6800	0.000593106	DNA replication initiation	overrepresented
GO:0007088	7	1963	2	6807	0.000662176	regulation of mitosis	overrepresented
GO:0000079	17	1953	18	6791	0.000720714	regulation of cyclin-dependent protein kinase activity	overrepresented
GO:0006118	59	1911	118	6691	0.000726896	electron transport	overrepresented
GO:0030218	9	1961	5	6804	0.000931833	erythrocyte differentiation	overrepresented
GO:0000122	43	1927	79	6730	0.00137589	negative regulation of transcription from RNA polymerase II promoter	overrepresented
GO:0015986	15	1955	16	6793	0.00166093	ATP synthesis coupled proton transport	overrepresented
GO:0006915	86	1884	197	6612	0.00177325	apoptosis	overrepresented
GO:0007031	7	1963	3	6806	0.00177838	peroxisome organization and biogenesis	overrepresented
GO:0006367	16	1954	19	6790	0.00203902	transcription initiation from RNA polymerase II promoter	overrepresented
GO:0007265	16	1954	19	6790	0.00203902	Ras protein signal transduction	overrepresented
GO:0006352	10	1960	8	6801	0.0022968	transcription initiation	overrepresented
GO:0045843	6	1964	2	6807	0.0023236	negative regulation of striated muscle development	overrepresented
GO:0000084	4	1966	0	6809	0.00252964	S phase of mitotic cell cycle	overrepresented
GO:0008634	5	1965	1	6808	0.00276588	negative regulation of survival gene product activity	overrepresented
GO:0009060	5	1965	1	6808	0.00276588	aerobic respiration	overrepresented
GO:0006512	88	1882	210	6599	0.00370898	ubiquitin cycle	overrepresented
GO:0006333	14	1956	17	6792	0.00451808	chromatin assembly or disassembly	overrepresented
GO:0006916	43	1927	88	6721	0.00585807	anti-apoptosis	overrepresented
GO:0006359	5	1965	2	6807	0.00788556	regulation of transcription from RNA polymerase III promoter	overrepresented
GO:0009725	5	1965	2	6807	0.00788556	response to hormone stimulus	overrepresented
GO:0006914	8	1962	7	6802	0.008815	autophagy	overrepresented
GO:0006355	282	1688	824	5985	0.00980031	regulation of transcription, DNA-dependent	overrepresented
GO:0000076	4	1966	1	6808	0.0103812	DNA replication checkpoint	overrepresented
GO:0006354	4	1966	1	6808	0.0103812	RNA elongation	overrepresented
GO:0006744	4	1966	1	6808	0.0103812	ubiquinone biosynthetic process	overrepresented
GO:0007018	22	1948	37	6772	0.0111438	microtubule-based movement	overrepresented
GO:0000089	3	1967	0	6809	0.0112863	mitotic metaphase	overrepresented
GO:0006110	3	1967	0	6809	0.0112863	regulation of glycolysis	overrepresented
GO:0006422	3	1967	0	6809	0.0112863	aspartyl-tRNA aminoacylation	overrepresented
GO:0007500	3	1967	0	6809	0.0112863	mesodermal cell fate determination	overrepresented
GO:0008535	3	1967	0	6809	0.0112863	cytochrome c oxidase complex assembly	overrepresented
GO:0019827	3	1967	0	6809	0.0112863	stem cell maintenance	overrepresented
GO:0050684	3	1967	0	6809	0.0112863	regulation of mRNA processing	overrepresented
GO:0006783	6	1964	4	6805	0.0114485	heme biosynthetic process	overrepresented
GO:0000070	5	1965	3	6806	0.0171555	mitotic sister chromatid segregation	overrepresented
GO:0006303	5	1965	3	6806	0.0171555	double-strand break repair via nonhomologous end joining	overrepresented
GO:0006368	5	1965	3	6806	0.0171555	RNA elongation from RNA polymerase II promoter	overrepresented
GO:0006376	5	1965	3	6806	0.0171555	mRNA splice site selection	overrepresented
GO:0045786	30	1940	61	6748	0.0221362	negative regulation of progression through cell cycle	overrepresented
GO:0006298	9	1961	10	6799	0.0222795	mismatch repair	overrepresented
GO:0007417	27	1943	54	6755	0.022595	central nervous system development	overrepresented
GO:0006096	14	1956	21	6788	0.0229152	glycolysis	overrepresented
GO:0008152	79	1891	202	6607	0.0240633	metabolic process	overrepresented
GO:0001558	25	1945	49	6760	0.0244747	regulation of cell growth	overrepresented
GO:0006637	4	1966	2	6807	0.0256117	acyl-CoA metabolic process	overrepresented
GO:0010033	5	1965	4	6805	0.0315418	response to organic substance	overrepresented
GO:0045736	5	1965	4	6805	0.0315418	negative regulation of cyclin-dependent protein kinase activity	overrepresented
GO:0006401	6	1964	6	6803	0.0332652	RNA catabolic process	overrepresented
GO:0016575	6	1964	6	6803	0.0332652	histone deacetylation	overrepresented
GO:0006904	8	1962	9	6800	0.0348884	vesicle docking during exocytosis	overrepresented
GO:0006412	52	1918	127	6682	0.0370785	translation	overrepresented
GO:0000087	3	1967	1	6808	0.0375562	M phase of mitotic cell cycle	overrepresented
GO:0006308	3	1967	1	6808	0.0375562	DNA catabolic process	overrepresented
GO:0006405	3	1967	1	6808	0.0375562	RNA export from nucleus	overrepresented
GO:0006510	3	1967	1	6808	0.0375562	ATP-dependent proteolysis	overrepresented
GO:0006536	3	1967	1	6808	0.0375562	glutamate metabolic process	overrepresented
GO:0007288	3	1967	1	6808	0.0375562	sperm axoneme assembly	overrepresented
GO:0019932	3	1967	1	6808	0.0375562	second-messenger-mediated signaling	overrepresented
GO:0042541	3	1967	1	6808	0.0375562	hemoglobin biosynthetic process	overrepresented
GO:0042921	3	1967	1	6808	0.0375562	glucocorticoid receptor signaling pathway	overrepresented
GO:0051271	3	1967	1	6808	0.0375562	negative regulation of cell motility	overrepresented
GO:0006944	8	1962	10	6799	0.0417278	membrane fusion	overrepresented
GO:0016481	26	1944	55	6754	0.0440246	negative regulation of transcription	overrepresented
GO:0006081	4	1966	3	6806	0.0492466	aldehyde metabolic process	overrepresented
GO:0008637	4	1966	3	6806	0.0492466	apoptotic mitochondrial changes	overrepresented
GO:0016071	4	1966	3	6806	0.0492466	mRNA metabolic process	overrepresented
GO:0050718	4	1966	3	6806	0.0492466	positive regulation of interleukin-1 beta secretion	overrepresented
GO:0007186	13	1957	237	6572	6.57057e-14	G-protein coupled receptor protein signaling pathway	underrepresented
GO:0007155	31	1939	329	6480	2.51651e-12	cell adhesion	underrepresented
GO:0007165	154	1816	904	5905	1.14295e-11	signal transduction	underrepresented
GO:0006811	23	1947	255	6554	3.01125e-10	ion transport	underrepresented
GO:0007156	1	1969	61	6748	4.26361e-06	homophilic cell adhesion	underrepresented
GO:0007204	0	1970	44	6765	2.7919e-05	elevation of cytosolic calcium ion concentration	underrepresented
GO:0007268	14	1956	138	6671	3.01724e-05	synaptic transmission	underrepresented
GO:0006813	7	1963	89	6720	0.000109879	potassium ion transport	underrepresented
GO:0006935	8	1962	96	6713	0.000120139	chemotaxis	underrepresented
GO:0006936	4	1966	67	6742	0.000262174	muscle contraction	underrepresented
GO:0007601	14	1956	121	6688	0.000365072	visual perception	underrepresented
GO:0050896	11	1959	103	6706	0.000605858	response to stimulus	underrepresented
GO:0006954	25	1945	168	6641	0.00088493	inflammatory response	underrepresented
GO:0007267	37	1933	221	6588	0.00109684	cell-cell signaling	underrepresented
GO:0007169	6	1964	69	6740	0.00128687	transmembrane receptor protein tyrosine kinase signaling pathway	underrepresented
GO:0006817	4	1966	56	6753	0.00167522	phosphate transport	underrepresented
GO:0007596	5	1965	60	6749	0.00254776	blood coagulation	underrepresented
GO:0007399	35	1935	204	6605	0.0027444	nervous system development	underrepresented
GO:0016337	2	1968	39	6770	0.00418213	cell-cell adhesion	underrepresented
GO:0007154	3	1967	45	6764	0.00481102	cell communication	underrepresented
GO:0006898	1	1969	31	6778	0.00490612	receptor-mediated endocytosis	underrepresented
GO:0008217	1	1969	32	6777	0.00518237	blood pressure regulation	underrepresented
GO:0006816	6	1964	63	6746	0.00528732	calcium ion transport	underrepresented
GO:0006928	14	1956	102	6707	0.00676785	cell motility	underrepresented
GO:0006955	61	1909	304	6505	0.00701677	immune response	underrepresented
GO:0007218	4	1966	48	6761	0.00730959	neuropeptide signaling pathway	underrepresented
GO:0006941	0	1970	22	6787	0.00784526	striated muscle contraction	underrepresented
GO:0007626	0	1970	22	6787	0.00784526	locomotory behavior	underrepresented
GO:0000187	1	1969	27	6782	0.0115653	activation of MAPK activity	underrepresented
GO:0030154	41	1929	214	6595	0.0119501	cell differentiation	underrepresented
GO:0030036	8	1962	68	6741	0.0121371	actin cytoskeleton organization and biogenesis	underrepresented
GO:0045087	4	1966	44	6765	0.0149303	innate immune response	underrepresented
GO:0030216	1	1969	26	6783	0.0182128	keratinocyte differentiation	underrepresented
GO:0007338	0	1970	17	6792	0.0190776	fertilization (sensu Metazoa)	underrepresented
GO:0007565	3	1967	38	6771	0.0222466	pregnancy	underrepresented
GO:0042472	1	1969	24	6785	0.0276525	inner ear morphogenesis	underrepresented
GO:0006939	0	1970	16	6793	0.0312878	smooth muscle contraction	underrepresented
GO:0006417	1	1969	22	6787	0.0419247	regulation of translation	underrepresented
GO:0016042	4	1966	39	6770	0.0422308	lipid catabolic process	underrepresented
GO:0007588	2	1968	27	6782	0.0444497	excretion	underrepresented

## Sheet: GO-Molecular Function
GO: Molecular Function Ontology
E2 in Current Screen
GO Term	#genes with term in list	#genes in list without the term	#genes with the term, not in list	#genes, without term, not in list	p-Value	GO Term Description	Over / Under-represented in current list
GO:0004842	39	0	88	8745	1.87989e-75	ubiquitin-protein ligase activity	overrepresented
GO:0016874	31	8	153	8680	2.57033e-46	ligase activity	overrepresented
GO:0004840	18	21	11	8822	1.18206e-37	ubiquitin conjugating enzyme activity	overrepresented
GO:0042296	2	37	0	8833	1.88302e-05	ISG15 conjugating enzyme activity	overrepresented
GO:0004459	1	38	5	8828	0.0260942	L-lactate dehydrogenase activity	overrepresented
GO:0043130	1	38	9	8824	0.0431205	ubiquitin binding	overrepresented
GO:0008270	0	39	1161	7672	0.00728294	zinc ion binding	underrepresented
GO:0046872	0	39	1174	7659	0.00732484	metal ion binding	underrepresented
GO:0016740	0	39	814	8019	0.0462769	transferase activity	underrepresented
RINGS in Current Screen
GO Term	#genes with term in list	#genes in list without the term	#genes with the term, not in list	#genes, without term, not in list	p-Value	GO Term Description	Over / Under-represented in current list
GO:0008270	135	2	1060	7702	1.47038e-117	zinc ion binding	overrepresented
GO:0046872	129	8	1076	7686	1.76373e-103	metal ion binding	overrepresented
GO:0005515	132	5	3231	5531	1.23302e-49	protein binding	overrepresented
GO:0016874	31	106	150	8612	2.28215e-24	ligase activity	overrepresented
GO:0004842	24	113	98	8664	1.91701e-20	ubiquitin-protein ligase activity	overrepresented
GO:0050681	3	134	19	8743	0.00443677	androgen receptor binding	overrepresented
GO:0031593	1	136	0	8762	0.015395	polyubiquitin binding	overrepresented
GO:0003676	11	126	318	8444	0.0180078	nucleic acid binding	overrepresented
GO:0019899	3	134	40	8722	0.0281455	enzyme binding	overrepresented
GO:0017163	1	136	1	8761	0.0305547	negative regulator of basal transcription activity	overrepresented
GO:0016564	4	133	81	8681	0.0418207	transcriptional repressor activity	overrepresented
GO:0004176	1	136	2	8760	0.0454826	ATP-dependent peptidase activity	overrepresented
GO:0003682	4	133	84	8678	0.0465219	chromatin binding	overrepresented
GO:0000166	1	136	1273	7489	2.13409e-08	nucleotide binding	underrepresented
GO:0005524	0	137	985	7777	1.39326e-07	ATP binding	underrepresented
GO:0016740	0	137	814	7948	3.28274e-06	transferase activity	underrepresented
GO:0004872	3	134	722	8040	0.00662222	receptor activity	underrepresented
GO:0043565	0	137	320	8442	0.0101451	sequence-specific DNA binding	underrepresented
GO:0016787	2	135	556	8206	0.0121792	hydrolase activity	underrepresented
GO:0004674	0	137	313	8449	0.0159377	protein serine/threonine kinase activity	underrepresented
GO:0005509	3	134	581	8181	0.0351413	calcium ion binding	underrepresented
GO:0000287	0	137	259	8503	0.0353573	magnesium ion binding	underrepresented
First neighbours of E2/RINGs in human interactome
GO Term	#genes with term in list	#genes in list without the term	#genes with the term, not in list	#genes, without term, not in list	p-Value	GO Term Description	Over / Under-represented in current list
GO:0005515	595	538	2739	5008	6.5545e-28	protein binding	overrepresented
GO:0005524	192	941	797	6950	2.81955e-10	ATP binding	overrepresented
GO:0000166	228	905	1049	6698	1.66368e-08	nucleotide binding	overrepresented
GO:0003713	44	1089	110	7637	1.28546e-07	transcription coactivator activity	overrepresented
GO:0008134	26	1107	51	7696	1.49473e-06	transcription factor binding	overrepresented
GO:0003690	13	1120	12	7735	2.61589e-06	double-stranded DNA binding	overrepresented
GO:0016740	147	986	668	7079	5.7832e-06	transferase activity	overrepresented
GO:0008022	18	1115	28	7719	5.84727e-06	protein C-terminus binding	overrepresented
GO:0016874	45	1088	134	7613	6.58561e-06	ligase activity	overrepresented
GO:0003735	35	1098	94	7653	1.2018e-05	structural constituent of ribosome	overrepresented
GO:0003677	124	1009	549	7198	1.3779e-05	DNA binding	overrepresented
GO:0004298	10	1123	8	7739	1.82353e-05	threonine endopeptidase activity	overrepresented
GO:0004713	30	1103	76	7671	2.23107e-05	protein-tyrosine kinase activity	overrepresented
GO:0003684	14	1119	20	7727	3.25022e-05	damaged DNA binding	overrepresented
GO:0004402	9	1124	7	7740	4.28628e-05	histone acetyltransferase activity	overrepresented
GO:0003697	15	1118	24	7723	4.45242e-05	single-stranded DNA binding	overrepresented
GO:0003743	18	1115	36	7711	7.37249e-05	translation initiation factor activity	overrepresented
GO:0005031	6	1127	2	7745	9.48547e-05	tumor necrosis factor receptor activity	overrepresented
GO:0032405	5	1128	1	7746	0.000179997	MutLalpha complex binding	overrepresented
GO:0003714	28	1105	79	7668	0.000184567	transcription corepressor activity	overrepresented
GO:0008426	4	1129	0	7747	0.00026379	protein kinase C inhibitor activity	overrepresented
GO:0004003	8	1125	8	7739	0.000341693	ATP-dependent DNA helicase activity	overrepresented
GO:0019904	7	1126	6	7741	0.000460335	protein domain specific binding	overrepresented
GO:0004709	5	1128	2	7745	0.000563484	MAP kinase kinase kinase activity	overrepresented
GO:0005006	5	1128	2	7745	0.000563484	epidermal growth factor receptor activity	overrepresented
GO:0004197	9	1124	13	7734	0.00091006	cysteine-type endopeptidase activity	overrepresented
GO:0050681	9	1124	13	7734	0.00091006	androgen receptor binding	overrepresented
GO:0047485	6	1127	5	7742	0.00111067	protein N-terminus binding	overrepresented
GO:0004842	28	1105	92	7655	0.00129913	ubiquitin-protein ligase activity	overrepresented
GO:0008139	5	1128	3	7744	0.00134453	nuclear localization sequence binding	overrepresented
GO:0004221	12	1121	26	7721	0.00196838	ubiquitin thiolesterase activity	overrepresented
GO:0000175	6	1127	6	7741	0.00198263	3'-5'-exoribonuclease activity	overrepresented
GO:0003678	6	1127	6	7741	0.00198263	DNA helicase activity	overrepresented
GO:0008276	3	1130	0	7747	0.00207227	protein methyltransferase activity	overrepresented
GO:0031625	3	1130	0	7747	0.00207227	ubiquitin protein ligase binding	overrepresented
GO:0042802	33	1100	121	7626	0.00218117	identical protein binding	overrepresented
GO:0003924	34	1099	126	7621	0.00252433	GTPase activity	overrepresented
GO:0005159	5	1128	4	7743	0.00270802	insulin-like growth factor receptor binding	overrepresented
GO:0008270	181	952	983	6764	0.00295147	zinc ion binding	overrepresented
GO:0043560	4	1129	2	7745	0.00319422	insulin receptor substrate binding	overrepresented
GO:0042169	7	1126	10	7737	0.00328296	SH2 domain binding	overrepresented
GO:0003682	21	1112	67	7680	0.00351088	chromatin binding	overrepresented
GO:0004672	18	1115	53	7694	0.00352702	protein kinase activity	overrepresented
GO:0003700	105	1028	529	7218	0.00367153	transcription factor activity	overrepresented
GO:0004693	5	1128	5	7742	0.00485023	cyclin-dependent protein kinase activity	overrepresented
GO:0043130	5	1128	5	7742	0.00485023	ubiquitin binding	overrepresented
GO:0019843	6	1127	8	7739	0.00513828	rRNA binding	overrepresented
GO:0003705	8	1125	15	7732	0.00572867	RNA polymerase II transcription factor activity, enhancer binding	overrepresented
GO:0004839	4	1129	3	7744	0.00670187	ubiquitin activating enzyme activity	overrepresented
GO:0003886	3	1130	1	7746	0.00749772	DNA (cytosine-5-)-methyltransferase activity	overrepresented
GO:0004017	3	1130	1	7746	0.00749772	adenylate kinase activity	overrepresented
GO:0004682	3	1130	1	7746	0.00749772	protein kinase CK2 activity	overrepresented
GO:0004718	3	1130	1	7746	0.00749772	Janus kinase activity	overrepresented
GO:0032137	3	1130	1	7746	0.00749772	guanine/thymine mispair binding	overrepresented
GO:0043548	3	1130	1	7746	0.00749772	phosphoinositide 3-kinase binding	overrepresented
GO:0043621	3	1130	1	7746	0.00749772	protein self-association	overrepresented
GO:0050431	3	1130	1	7746	0.00749772	transforming growth factor beta binding	overrepresented
GO:0030145	19	1114	63	7684	0.0075293	manganese ion binding	overrepresented
GO:0004715	6	1127	9	7738	0.00765139	non-membrane spanning protein tyrosine kinase activity	overrepresented
GO:0016887	16	1117	49	7698	0.00790805	ATPase activity	overrepresented
GO:0008094	7	1126	13	7734	0.0092732	DNA-dependent ATPase activity	overrepresented
GO:0004004	6	1127	10	7737	0.0109418	ATP-dependent RNA helicase activity	overrepresented
GO:0004716	4	1129	4	7743	0.0120592	receptor signaling protein tyrosine kinase activity	overrepresented
GO:0046983	17	1116	56	7691	0.0122472	protein dimerization activity	overrepresented
GO:0000014	2	1131	0	7747	0.0162667	single-stranded DNA specific endodeoxyribonuclease activity	overrepresented
GO:0000400	2	1131	0	7747	0.0162667	four-way junction DNA binding	overrepresented
GO:0004090	2	1131	0	7747	0.0162667	carbonyl reductase (NADPH) activity	overrepresented
GO:0005010	2	1131	0	7747	0.0162667	insulin-like growth factor receptor activity	overrepresented
GO:0005025	2	1131	0	7747	0.0162667	transforming growth factor beta receptor activity, type I	overrepresented
GO:0005076	2	1131	0	7747	0.0162667	receptor signaling protein serine/threonine kinase signaling protein activity	overrepresented
GO:0008384	2	1131	0	7747	0.0162667	IkappaB kinase activity	overrepresented
GO:0015444	2	1131	0	7747	0.0162667	magnesium-importing ATPase activity	overrepresented
GO:0019206	2	1131	0	7747	0.0162667	nucleoside kinase activity	overrepresented
GO:0019949	2	1131	0	7747	0.0162667	SUMO conjugating enzyme activity	overrepresented
GO:0030306	2	1131	0	7747	0.0162667	ADP-ribosylation factor binding	overrepresented
GO:0030544	2	1131	0	7747	0.0162667	Hsp70 protein binding	overrepresented
GO:0030617	2	1131	0	7747	0.0162667	transforming growth factor beta receptor, inhibitory cytoplasmic mediator activity	overrepresented
GO:0032143	2	1131	0	7747	0.0162667	single thymine insertion binding	overrepresented
GO:0043559	2	1131	0	7747	0.0162667	insulin binding	overrepresented
GO:0045027	2	1131	0	7747	0.0162667	DNA end binding	overrepresented
GO:0046974	2	1131	0	7747	0.0162667	histone lysine N-methyltransferase activity (H3-K9 specific)	overrepresented
GO:0051879	2	1131	0	7747	0.0162667	Hsp90 protein binding	overrepresented
GO:0004704	3	1130	2	7745	0.0169672	NF-kappaB-inducing kinase activity	overrepresented
GO:0032407	3	1130	2	7745	0.0169672	MutSalpha complex binding	overrepresented
GO:0043027	3	1130	2	7745	0.0169672	caspase inhibitor activity	overrepresented
GO:0008234	11	1122	31	7716	0.0171191	cysteine-type peptidase activity	overrepresented
GO:0004708	4	1129	5	7742	0.0195402	MAP kinase kinase activity	overrepresented
GO:0008536	4	1129	5	7742	0.0195402	Ran GTPase binding	overrepresented
GO:0051059	4	1129	5	7742	0.0195402	NF-kappaB binding	overrepresented
GO:0030693	6	1127	12	7735	0.020285	caspase activity	overrepresented
GO:0046982	19	1114	71	7676	0.024771	protein heterodimerization activity	overrepresented
GO:0003723	65	1068	328	7419	0.0247851	RNA binding	overrepresented
GO:0003746	5	1128	9	7738	0.0248911	translation elongation factor activity	overrepresented
GO:0008408	5	1128	9	7738	0.0248911	3'-5' exonuclease activity	overrepresented
GO:0046332	5	1128	9	7738	0.0248911	SMAD binding	overrepresented
GO:0004871	44	1089	205	7542	0.026066	signal transducer activity	overrepresented
GO:0003712	7	1126	17	7730	0.0262702	transcription cofactor activity	overrepresented
GO:0003702	24	1109	99	7648	0.0290852	RNA polymerase II transcription factor activity	overrepresented
GO:0000049	4	1129	6	7741	0.0293335	tRNA binding	overrepresented
GO:0003857	3	1130	3	7744	0.0307401	3-hydroxyacyl-CoA dehydrogenase activity	overrepresented
GO:0004300	3	1130	3	7744	0.0307401	enoyl-CoA hydratase activity	overrepresented
GO:0043531	3	1130	3	7744	0.0307401	ADP binding	overrepresented
GO:0005496	6	1127	15	7732	0.0425284	steroid binding	overrepresented
GO:0000163	2	1131	1	7746	0.0446555	protein phosphatase type 1 activity	overrepresented
GO:0003847	2	1131	1	7746	0.0446555	1-alkyl-2-acetylglycerophosphocholine esterase activity	overrepresented
GO:0003906	2	1131	1	7746	0.0446555	DNA-(apurinic or apyrimidinic site) lyase activity	overrepresented
GO:0003918	2	1131	1	7746	0.0446555	DNA topoisomerase (ATP-hydrolyzing) activity	overrepresented
GO:0003985	2	1131	1	7746	0.0446555	acetyl-CoA C-acetyltransferase activity	overrepresented
GO:0004013	2	1131	1	7746	0.0446555	adenosylhomocysteinase activity	overrepresented
GO:0004422	2	1131	1	7746	0.0446555	hypoxanthine phosphoribosyltransferase activity	overrepresented
GO:0004634	2	1131	1	7746	0.0446555	phosphopyruvate hydratase activity	overrepresented
GO:0004829	2	1131	1	7746	0.0446555	threonine-tRNA ligase activity	overrepresented
GO:0004886	2	1131	1	7746	0.0446555	retinoid-X receptor activity	overrepresented
GO:0005055	2	1131	1	7746	0.0446555	laminin receptor activity	overrepresented
GO:0005072	2	1131	1	7746	0.0446555	transforming growth factor beta receptor, cytoplasmic mediator activity	overrepresented
GO:0015482	2	1131	1	7746	0.0446555	voltage-gated anion channel porin activity	overrepresented
GO:0019201	2	1131	1	7746	0.0446555	nucleotide kinase activity	overrepresented
GO:0019209	2	1131	1	7746	0.0446555	kinase activator activity	overrepresented
GO:0019789	2	1131	1	7746	0.0446555	SUMO ligase activity	overrepresented
GO:0032142	2	1131	1	7746	0.0446555	single guanine insertion binding	overrepresented
GO:0032357	2	1131	1	7746	0.0446555	oxidized purine DNA binding	overrepresented
GO:0004840	8	1125	22	7725	0.0470103	ubiquitin conjugating enzyme activity	overrepresented
GO:0019901	11	1122	37	7710	0.0474555	protein kinase binding	overrepresented
GO:0000339	3	1130	4	7743	0.0487689	RNA cap binding	overrepresented
GO:0008093	3	1130	4	7743	0.0487689	cytoskeletal adaptor activity	overrepresented
GO:0005509	33	1100	551	7196	8.21175e-09	calcium ion binding	underrepresented
GO:0001584	3	1130	152	7595	2.28669e-06	rhodopsin-like receptor activity	underrepresented
GO:0005179	1	1132	71	7676	0.00109155	hormone activity	underrepresented
GO:0005529	3	1130	96	7651	0.00129903	sugar binding	underrepresented
GO:0005201	1	1132	65	7682	0.00243371	extracellular matrix structural constituent	underrepresented
GO:0008009	0	1133	44	7703	0.00495998	chemokine activity	underrepresented
GO:0004222	0	1133	40	7707	0.00738847	metalloendopeptidase activity	underrepresented
GO:0004930	0	1133	40	7707	0.00738847	G-protein coupled receptor activity	underrepresented
GO:0008083	5	1128	103	7644	0.00826767	growth factor activity	underrepresented
GO:0048503	3	1130	76	7671	0.0107549	GPI anchor binding	underrepresented
GO:0004867	1	1132	51	7696	0.0115248	serine-type endopeptidase inhibitor activity	underrepresented
GO:0005089	1	1132	53	7694	0.0120068	Rho guanyl-nucleotide exchange factor activity	underrepresented
GO:0004252	1	1132	50	7697	0.0178496	serine-type endopeptidase activity	underrepresented
GO:0003676	28	1105	296	7451	0.0218694	nucleic acid binding	underrepresented
GO:0004872	73	1060	651	7096	0.0233735	receptor activity	underrepresented
GO:0005216	7	1126	109	7638	0.0247974	ion channel activity	underrepresented
GO:0005096	6	1127	95	7652	0.0355163	GTPase activator activity	underrepresented
GO:0031402	2	1131	54	7693	0.0415561	sodium ion binding	underrepresented
First neighbours of the E2/RINGs from predicted/interlog data
GO Term	#genes with term in list	#genes in list without the term	#genes with the term, not in list	#genes, without term, not in list	p-Value	GO Term Description	Over / Under-represented in current list
GO:0000166	414	1571	912	6352	2.00751e-19	nucleotide binding	overrepresented
GO:0005524	316	1669	707	6557	7.92786e-14	ATP binding	overrepresented
GO:0003723	146	1839	270	6994	5.86097e-11	RNA binding	overrepresented
GO:0016787	193	1792	404	6860	1.73642e-10	hydrolase activity	overrepresented
GO:0008026	26	1959	18	7246	6.24959e-08	ATP-dependent helicase activity	overrepresented
GO:0003677	212	1773	507	6757	1.37155e-07	DNA binding	overrepresented
GO:0003676	116	1869	231	7033	1.57731e-07	nucleic acid binding	overrepresented
GO:0003714	46	1939	61	7203	5.84191e-07	transcription corepressor activity	overrepresented
GO:0008234	26	1959	23	7241	1.13725e-06	cysteine-type peptidase activity	overrepresented
GO:0003682	39	1946	53	7211	5.23297e-06	chromatin binding	overrepresented
GO:0016874	69	1916	127	7137	8.6986e-06	ligase activity	overrepresented
GO:0004691	7	1978	0	7264	2.07992e-05	cAMP-dependent protein kinase activity	overrepresented
GO:0005478	10	1975	3	7261	3.05034e-05	intracellular transporter activity	overrepresented
GO:0004386	21	1964	21	7243	3.98357e-05	helicase activity	overrepresented
GO:0004221	22	1963	23	7241	5.9327e-05	ubiquitin thiolesterase activity	overrepresented
GO:0003713	54	1931	102	7162	0.000158478	transcription coactivator activity	overrepresented
GO:0009055	32	1953	49	7215	0.000199337	electron carrier activity	overrepresented
GO:0016820	12	1973	8	7256	0.000204283	hydrolase activity, acting on acid anhydrides, catalyzing transmembrane movement of substances	overrepresented
GO:0017111	24	1961	31	7233	0.000206462	nucleoside-triphosphatase activity	overrepresented
GO:0008656	9	1976	4	7260	0.000290543	caspase activator activity	overrepresented
GO:0030693	11	1974	7	7257	0.000303835	caspase activity	overrepresented
GO:0004519	19	1966	22	7242	0.000377513	endonuclease activity	overrepresented
GO:0042393	8	1977	3	7261	0.000390892	histone binding	overrepresented
GO:0004994	5	1980	0	7264	0.000453533	somatostatin receptor activity	overrepresented
GO:0003684	18	1967	21	7243	0.000578751	damaged DNA binding	overrepresented
GO:0004129	11	1974	8	7256	0.000582021	cytochrome-c oxidase activity	overrepresented
GO:0016491	77	1908	176	7088	0.000792289	oxidoreductase activity	overrepresented
GO:0003702	43	1942	85	7179	0.00151404	RNA polymerase II transcription factor activity	overrepresented
GO:0004003	10	1975	8	7256	0.00160405	ATP-dependent DNA helicase activity	overrepresented
GO:0008094	11	1974	10	7254	0.00176956	DNA-dependent ATPase activity	overrepresented
GO:0016251	11	1974	10	7254	0.00176956	general RNA polymerase II transcription factor activity	overrepresented
GO:0016986	6	1979	2	7262	0.00181514	transcription initiation factor activity	overrepresented
GO:0016563	37	1948	71	7193	0.00200169	transcriptional activator activity	overrepresented
GO:0004536	5	1980	1	7263	0.00223548	deoxyribonuclease activity	overrepresented
GO:0016652	5	1980	1	7263	0.00223548	oxidoreductase activity, acting on NADH or NADPH, NAD or NADP as acceptor	overrepresented
GO:0004871	75	1910	180	7084	0.00247894	signal transducer activity	overrepresented
GO:0046961	14	1971	16	7248	0.00253006	hydrogen ion transporting ATPase activity, rotational mechanism	overrepresented
GO:0005506	49	1936	106	7158	0.0029384	iron ion binding	overrepresented
GO:0004707	8	1977	6	7258	0.00381066	MAP kinase activity	overrepresented
GO:0016818	6	1979	3	7261	0.00445543	hydrolase activity, acting on acid anhydrides, in phosphorus-containing anhydrides	overrepresented
GO:0046933	13	1972	16	7248	0.0049869	hydrogen ion transporting ATP synthase activity, rotational mechanism	overrepresented
GO:0003887	8	1977	7	7257	0.00664194	DNA-directed DNA polymerase activity	overrepresented
GO:0003688	4	1981	1	7263	0.00876868	DNA replication origin binding	overrepresented
GO:0004303	4	1981	1	7263	0.00876868	estradiol 17-beta-dehydrogenase activity	overrepresented
GO:0004861	6	1979	4	7260	0.00912374	cyclin-dependent protein kinase inhibitor activity	overrepresented
GO:0010181	6	1979	4	7260	0.00912374	FMN binding	overrepresented
GO:0015662	6	1979	4	7260	0.00912374	ATPase activity, coupled to transmembrane movement of ions, phosphorylative mechanism	overrepresented
GO:0004104	3	1982	0	7264	0.00987373	cholinesterase activity	overrepresented
GO:0004176	3	1982	0	7264	0.00987373	ATP-dependent peptidase activity	overrepresented
GO:0004396	3	1982	0	7264	0.00987373	hexokinase activity	overrepresented
GO:0004449	3	1982	0	7264	0.00987373	isocitrate dehydrogenase (NAD+) activity	overrepresented
GO:0004705	3	1982	0	7264	0.00987373	JUN kinase activity	overrepresented
GO:0004739	3	1982	0	7264	0.00987373	pyruvate dehydrogenase (acetyl-transferring) activity	overrepresented
GO:0004815	3	1982	0	7264	0.00987373	aspartate-tRNA ligase activity	overrepresented
GO:0005113	3	1982	0	7264	0.00987373	patched binding	overrepresented
GO:0042808	3	1982	0	7264	0.00987373	neuronal Cdc2-like kinase binding	overrepresented
GO:0046582	3	1982	0	7264	0.00987373	Rap GTPase activator activity	overrepresented
GO:0050517	3	1982	0	7264	0.00987373	inositol hexakisphosphate kinase activity	overrepresented
GO:0051536	3	1982	0	7264	0.00987373	iron-sulfur cluster binding	overrepresented
GO:0046966	9	1976	10	7254	0.0106615	thyroid hormone receptor binding	overrepresented
GO:0051537	5	1980	3	7261	0.0141378	2 iron, 2 sulfur cluster binding	overrepresented
GO:0005525	73	1912	189	7075	0.0143168	GTP binding	overrepresented
GO:0031202	10	1975	12	7252	0.0150773	RNA splicing factor activity, transesterification mechanism	overrepresented
GO:0008378	6	1979	5	7259	0.0164604	galactosyltransferase activity	overrepresented
GO:0004004	8	1977	9	7255	0.0166429	ATP-dependent RNA helicase activity	overrepresented
GO:0008047	15	1970	24	7240	0.0169494	enzyme activator activity	overrepresented
GO:0008408	7	1978	7	7257	0.0170295	3'-5' exonuclease activity	overrepresented
GO:0005088	4	1981	2	7262	0.0218351	Ras guanyl-nucleotide exchange factor activity	overrepresented
GO:0008159	4	1981	2	7262	0.0218351	positive transcription elongation factor activity	overrepresented
GO:0015036	4	1981	2	7262	0.0218351	disulfide oxidoreductase activity	overrepresented
GO:0051920	4	1981	2	7262	0.0218351	peroxiredoxin activity	overrepresented
GO:0004407	6	1979	6	7258	0.0270296	histone deacetylase activity	overrepresented
GO:0016439	6	1979	6	7258	0.0270296	tRNA-pseudouridine synthase activity	overrepresented
GO:0051539	6	1979	6	7258	0.0270296	4 iron, 4 sulfur cluster binding	overrepresented
GO:0004740	3	1982	1	7263	0.0331452	[pyruvate dehydrogenase (lipoamide)] kinase activity	overrepresented
GO:0004835	3	1982	1	7263	0.0331452	tubulin-tyrosine ligase activity	overrepresented
GO:0005048	3	1982	1	7263	0.0331452	signal sequence binding	overrepresented
GO:0008266	3	1982	1	7263	0.0331452	poly(U) binding	overrepresented
GO:0008853	3	1982	1	7263	0.0331452	exodeoxyribonuclease III activity	overrepresented
GO:0042834	3	1982	1	7263	0.0331452	peptidoglycan binding	overrepresented
GO:0045502	3	1982	1	7263	0.0331452	dynein binding	overrepresented
GO:0003700	161	1824	489	6775	0.037325	transcription factor activity	overrepresented
GO:0019992	17	1968	33	7231	0.0375408	diacylglycerol binding	overrepresented
GO:0003924	48	1937	123	7141	0.0383659	GTPase activity	overrepresented
GO:0016566	6	1979	7	7257	0.0412664	specific transcriptional repressor activity	overrepresented
GO:0008168	18	1967	35	7229	0.0419382	methyltransferase activity	overrepresented
GO:0004467	4	1981	3	7261	0.042367	long-chain-fatty-acid-CoA ligase activity	overrepresented
GO:0016538	4	1981	3	7261	0.042367	cyclin-dependent protein kinase regulator activity	overrepresented
GO:0003913	2	1983	0	7264	0.0460426	DNA photolyase activity	overrepresented
GO:0003958	2	1983	0	7264	0.0460426	NADPH-hemoprotein reductase activity	overrepresented
GO:0003973	2	1983	0	7264	0.0460426	(S)-2-hydroxy-acid oxidase activity	overrepresented
GO:0003987	2	1983	0	7264	0.0460426	acetate-CoA ligase activity	overrepresented
GO:0004012	2	1983	0	7264	0.0460426	phospholipid-translocating ATPase activity	overrepresented
GO:0004357	2	1983	0	7264	0.0460426	glutamate-cysteine ligase activity	overrepresented
GO:0004365	2	1983	0	7264	0.0460426	glyceraldehyde-3-phosphate dehydrogenase (phosphorylating) activity	overrepresented
GO:0004370	2	1983	0	7264	0.0460426	glycerol kinase activity	overrepresented
GO:0004450	2	1983	0	7264	0.0460426	isocitrate dehydrogenase (NADP+) activity	overrepresented
GO:0004485	2	1983	0	7264	0.0460426	methylcrotonoyl-CoA carboxylase activity	overrepresented
GO:0004537	2	1983	0	7264	0.0460426	caspase-activated deoxyribonuclease activity	overrepresented
GO:0004658	2	1983	0	7264	0.0460426	propionyl-CoA carboxylase activity	overrepresented
GO:0004730	2	1983	0	7264	0.0460426	pseudouridylate synthase activity	overrepresented
GO:0004776	2	1983	0	7264	0.0460426	succinate-CoA ligase (GDP-forming) activity	overrepresented
GO:0004817	2	1983	0	7264	0.0460426	cysteine-tRNA ligase activity	overrepresented
GO:0004823	2	1983	0	7264	0.0460426	leucine-tRNA ligase activity	overrepresented
GO:0004826	2	1983	0	7264	0.0460426	phenylalanine-tRNA ligase activity	overrepresented
GO:0004828	2	1983	0	7264	0.0460426	serine-tRNA ligase activity	overrepresented
GO:0005148	2	1983	0	7264	0.0460426	prolactin receptor binding	overrepresented
GO:0008148	2	1983	0	7264	0.0460426	negative transcription elongation factor activity	overrepresented
GO:0008198	2	1983	0	7264	0.0460426	ferrous iron binding	overrepresented
GO:0008379	2	1983	0	7264	0.0460426	thioredoxin peroxidase activity	overrepresented
GO:0008519	2	1983	0	7264	0.0460426	ammonium transporter activity	overrepresented
GO:0009003	2	1983	0	7264	0.0460426	signal peptidase activity	overrepresented
GO:0015923	2	1983	0	7264	0.0460426	mannosidase activity	overrepresented
GO:0016505	2	1983	0	7264	0.0460426	apoptotic protease activator activity	overrepresented
GO:0017068	2	1983	0	7264	0.0460426	glutamyl-tRNA(Gln) amidotransferase activity	overrepresented
GO:0030911	2	1983	0	7264	0.0460426	TPR domain binding	overrepresented
GO:0043237	2	1983	0	7264	0.0460426	laminin-1 binding	overrepresented
GO:0045569	2	1983	0	7264	0.0460426	TRAIL binding	overrepresented
GO:0046592	2	1983	0	7264	0.0460426	polyamine oxidase activity	overrepresented
GO:0051538	2	1983	0	7264	0.0460426	3 iron, 4 sulfur cluster binding	overrepresented
GO:0004872	69	1916	660	6604	6.21625e-19	receptor activity	underrepresented
GO:0005509	70	1915	523	6741	4.19327e-10	calcium ion binding	underrepresented
GO:0005216	6	1979	112	7152	1.23585e-06	ion channel activity	underrepresented
GO:0001584	11	1974	145	7119	1.56972e-06	rhodopsin-like receptor activity	underrepresented
GO:0048503	3	1982	76	7188	1.32991e-05	GPI anchor binding	underrepresented
GO:0004930	0	1985	40	7224	0.000122827	G-protein coupled receptor activity	underrepresented
GO:0008009	1	1984	43	7221	0.000625604	chemokine activity	underrepresented
GO:0005529	9	1976	92	7172	0.00134761	sugar binding	underrepresented
GO:0030955	6	1979	72	7192	0.00199632	potassium ion binding	underrepresented
GO:0005516	12	1973	105	7159	0.00204808	calmodulin binding	underrepresented
GO:0005201	5	1980	63	7201	0.00271156	extracellular matrix structural constituent	underrepresented
GO:0005198	27	1958	173	7091	0.00513864	structural molecule activity	underrepresented
GO:0005319	1	1984	32	7232	0.00517462	lipid transporter activity	underrepresented
GO:0008307	2	1983	36	7228	0.00978666	structural constituent of muscle	underrepresented
GO:0005249	3	1982	42	7222	0.0107149	voltage-gated potassium channel activity	underrepresented
GO:0005244	0	1985	20	7244	0.0123639	voltage-gated ion channel activity	underrepresented
GO:0008083	13	1972	97	7167	0.0135373	growth factor activity	underrepresented
GO:0008201	6	1979	59	7205	0.0144595	heparin binding	underrepresented
GO:0004867	4	1981	48	7216	0.0161903	serine-type endopeptidase inhibitor activity	underrepresented
GO:0004713	13	1972	93	7171	0.0173949	protein-tyrosine kinase activity	underrepresented
GO:0005254	0	1985	18	7246	0.0197765	chloride channel activity	underrepresented
GO:0017137	0	1985	18	7246	0.0197765	Rab GTPase binding	underrepresented
GO:0005234	0	1985	19	7245	0.020762	glutamate-gated ion channel activity	underrepresented
GO:0005102	12	1973	85	7179	0.0254099	receptor binding	underrepresented
GO:0005515	682	1303	2691	4573	0.0289729	protein binding	underrepresented
GO:0005179	8	1977	65	7199	0.030653	hormone activity	underrepresented
GO:0004252	5	1980	47	7217	0.0405788	serine-type endopeptidase activity	underrepresented
GO:0031404	3	1982	34	7230	0.0455022	chloride ion binding	underrepresented

## Sheet: GO-Cellular Component
GO: Cellular Component
E2 in Current Screen
GO Term	#genes with term in list	#genes in list without the term	#genes with the term, not in list	#genes, without term, not in list	p-Value	GO Term Description	Over / Under-represented in current list
GO:0031372	2	13	0	8187	3.122e-06	UBC13-MMS2 complex	overrepresented
GO:0031371	1	14	1	8186	0.00365452	ubiquitin conjugating enzyme complex	overrepresented
GO:0000795	1	14	5	8182	0.0109262	synaptonemal complex	overrepresented
GO:0005783	3	12	380	7807	0.0302459	endoplasmic reticulum	overrepresented
RINGS in Current Screen
GO Term	#genes with term in list	#genes in list without the term	#genes with the term, not in list	#genes, without term, not in list	p-Value	GO Term Description	Over / Under-represented in current list
GO:0005622	40	63	1027	7092	2.8666e-11	intracellular	overrepresented
GO:0031519	5	98	4	8115	3.3889e-08	PcG protein complex	overrepresented
GO:0000151	8	95	34	8085	3.82636e-08	ubiquitin ligase complex	overrepresented
GO:0001739	3	100	1	8118	7.56944e-06	sex chromatin	overrepresented
GO:0016604	4	99	8	8111	1.06454e-05	nuclear body	overrepresented
GO:0016605	2	101	7	8112	0.00528328	PML body	overrepresented
GO:0016235	1	102	0	8119	0.0125274	aggresome	overrepresented
GO:0008274	1	102	1	8118	0.0248993	gamma-tubulin ring complex	overrepresented
GO:0031436	1	102	1	8118	0.0248993	BRCA1-BARD1 complex	overrepresented
GO:0005777	3	100	55	8064	0.0358583	peroxisome	overrepresented
GO:0005887	1	102	771	7348	0.000918427	integral to plasma membrane	underrepresented
GO:0005615	0	103	371	7748	0.0148846	extracellular space	underrepresented
GO:0005576	1	102	498	7621	0.0209232	extracellular region	underrepresented
GO:0005739	1	102	470	7649	0.0305953	mitochondrion	underrepresented
GO:0005886	2	101	561	7558	0.0472281	plasma membrane	underrepresented
First neighbours of E2/RINGs in human interactome
GO Term	#genes with term in list	#genes in list without the term	#genes with the term, not in list	#genes, without term, not in list	p-Value	GO Term Description	Over / Under-represented in current list
GO:0005634	527	522	2327	4840	2.80151e-28	nucleus	overrepresented
GO:0005737	257	792	1059	6108	2.41574e-14	cytoplasm	overrepresented
GO:0005829	73	976	201	6966	2.81931e-10	cytosol	overrepresented
GO:0000502	14	1035	6	7161	5.18649e-09	proteasome complex (sensu Eukaryota)	overrepresented
GO:0005842	18	1031	22	7145	5.02254e-07	cytosolic large ribosomal subunit (sensu Eukaryota)	overrepresented
GO:0005839	11	1038	7	7160	1.88957e-06	proteasome core complex (sensu Eukaryota)	overrepresented
GO:0005840	32	1017	75	7092	2.45891e-06	ribosome	overrepresented
GO:0005622	185	864	875	6292	2.59444e-06	intracellular	overrepresented
GO:0000785	20	1029	37	7130	1.25681e-05	chromatin	overrepresented
GO:0005657	6	1043	1	7166	2.66865e-05	replication fork	overrepresented
GO:0005838	6	1043	2	7165	9.51505e-05	proteasome regulatory particle (sensu Eukaryota)	overrepresented
GO:0000307	5	1044	1	7166	0.000180496	cyclin-dependent protein kinase holoenzyme complex	overrepresented
GO:0043234	16	1033	34	7133	0.000314174	protein complex	overrepresented
GO:0005667	21	1028	55	7112	0.000418194	transcription factor complex	overrepresented
GO:0005654	20	1029	52	7115	0.000543681	nucleoplasm	overrepresented
GO:0005874	32	1017	105	7062	0.000646303	microtubule	overrepresented
GO:0005643	16	1033	37	7130	0.000653138	nuclear pore	overrepresented
GO:0000794	7	1042	7	7160	0.000822345	condensed nuclear chromosome	overrepresented
GO:0000776	9	1040	13	7154	0.000913397	kinetochore	overrepresented
GO:0005853	4	1045	1	7166	0.0011875	eukaryotic translation elongation factor 1 complex	overrepresented
GO:0005843	11	1038	22	7145	0.00185592	cytosolic small ribosomal subunit (sensu Eukaryota)	overrepresented
GO:0035267	4	1045	2	7165	0.0032015	NuA4 histone acetyltransferase complex	overrepresented
GO:0016363	7	1042	10	7157	0.00329334	nuclear matrix	overrepresented
GO:0048471	14	1035	36	7131	0.00413049	perinuclear region	overrepresented
GO:0005852	5	1044	5	7162	0.00486278	eukaryotic translation initiation factor 3 complex	overrepresented
GO:0016607	5	1044	5	7162	0.00486278	nuclear speck	overrepresented
GO:0016328	4	1045	3	7164	0.0067168	lateral plasma membrane	overrepresented
GO:0000781	6	1043	10	7157	0.0109722	chromosome, telomeric region	overrepresented
GO:0000123	2	1047	0	7167	0.016288	histone acetyltransferase complex	overrepresented
GO:0030870	2	1047	0	7167	0.016288	Mre11 complex	overrepresented
GO:0032301	2	1047	0	7167	0.016288	MutSalpha complex	overrepresented
GO:0000151	11	1038	31	7136	0.017153	ubiquitin ligase complex	overrepresented
GO:0030130	4	1045	5	7162	0.0195817	clathrin coat of trans-Golgi network vesicle	overrepresented
GO:0005730	19	1030	71	7096	0.0247841	nucleolus	overrepresented
GO:0031941	3	1046	3	7164	0.0307929	filamentous actin	overrepresented
GO:0000793	5	1044	10	7157	0.0335897	condensed chromosome	overrepresented
GO:0001725	5	1044	10	7157	0.0335897	stress fiber	overrepresented
GO:0045121	7	1042	19	7148	0.0399607	lipid raft	overrepresented
GO:0017053	4	1045	7	7160	0.0416272	transcriptional repressor complex	overrepresented
GO:0030286	4	1045	7	7160	0.0416272	dynein complex	overrepresented
GO:0000015	2	1047	1	7166	0.0447118	phosphopyruvate hydratase complex	overrepresented
GO:0032449	2	1047	1	7166	0.0447118	CBM complex	overrepresented
GO:0042405	2	1047	1	7166	0.0447118	nuclear inclusion body	overrepresented
GO:0005885	3	1046	4	7163	0.04885	Arp2/3 protein complex	overrepresented
GO:0005576	8	1041	491	6676	1.77899e-20	extracellular region	underrepresented
GO:0016021	89	960	1306	5861	4.85067e-17	integral to membrane	underrepresented
GO:0016020	177	872	2042	5125	1.85863e-16	membrane	underrepresented
GO:0005615	14	1035	358	6809	2.25343e-09	extracellular space	underrepresented
GO:0005578	2	1047	127	7040	6.84819e-06	extracellular matrix (sensu Metazoa)	underrepresented
GO:0005887	64	985	709	6458	4.3705e-05	integral to plasma membrane	underrepresented
GO:0008021	0	1049	38	7129	0.0118302	synaptic vesicle	underrepresented
GO:0005886	55	994	508	6659	0.026067	plasma membrane	underrepresented
GO:0005604	0	1049	31	7136	0.027169	basement membrane	underrepresented
GO:0005624	33	1016	326	6841	0.042706	membrane fraction	underrepresented
First neighbours of the E2/RINGs from predicted/interlog data
GO Term	#genes with term in list	#genes in list without the term	#genes with the term, not in list	#genes, without term, not in list	p-Value	GO Term Description	Over / Under-represented in current list
GO:0005634	822	1016	2133	4562	3.94838e-24	nucleus	overrepresented
GO:0005777	37	1801	28	6667	4.91603e-10	peroxisome	overrepresented
GO:0000786	33	1805	22	6673	6.4709e-10	nucleosome	overrepresented
GO:0005739	161	1677	350	6345	6.17885e-08	mitochondrion	overrepresented
GO:0005681	47	1791	61	6634	3.46549e-07	spliceosome	overrepresented
GO:0005654	36	1802	40	6655	6.63795e-07	nucleoplasm	overrepresented
GO:0005694	44	1794	61	6634	3.26991e-06	chromosome	overrepresented
GO:0005730	38	1800	55	6640	2.13672e-05	nucleolus	overrepresented
GO:0030176	16	1822	14	6681	0.000129972	integral to endoplasmic reticulum membrane	overrepresented
GO:0030530	11	1827	6	6689	0.000151552	heterogeneous nuclear ribonucleoprotein complex	overrepresented
GO:0016469	15	1823	13	6682	0.000197899	proton-transporting two-sector ATPase complex	overrepresented
GO:0005779	9	1829	4	6691	0.00029891	integral to peroxisomal membrane	overrepresented
GO:0005737	341	1497	1012	5683	0.000465829	cytoplasm	overrepresented
GO:0005675	6	1832	1	6694	0.000566741	transcription factor TFIIH complex	overrepresented
GO:0000118	11	1827	8	6687	0.00060087	histone deacetylase complex	overrepresented
GO:0000922	9	1829	5	6690	0.000676902	spindle pole	overrepresented
GO:0005635	19	1819	24	6671	0.0010909	nuclear envelope	overrepresented
GO:0005783	115	1723	293	6402	0.00129125	endoplasmic reticulum	overrepresented
GO:0005789	19	1819	29	6666	0.00428194	endoplasmic reticulum membrane	overrepresented
GO:0000785	23	1815	39	6656	0.00479943	chromatin	overrepresented
GO:0005813	17	1821	26	6669	0.00793471	centrosome	overrepresented
GO:0030529	25	1813	46	6649	0.00833934	ribonucleoprotein complex	overrepresented
GO:0005786	6	1832	4	6691	0.00929198	signal recognition particle (sensu Eukaryota)	overrepresented
GO:0005874	44	1794	99	6596	0.00994523	microtubule	overrepresented
GO:0005669	9	1829	10	6685	0.0109175	transcription factor TFIID complex	overrepresented
GO:0005622	273	1565	841	5854	0.0110393	intracellular	overrepresented
GO:0005667	26	1812	51	6644	0.0118756	transcription factor complex	overrepresented
GO:0035253	5	1833	3	6692	0.0143603	ciliary rootlet	overrepresented
GO:0005778	6	1832	5	6690	0.0167515	peroxisomal membrane	overrepresented
GO:0005843	13	1825	20	6675	0.0184058	cytosolic small ribosomal subunit (sensu Eukaryota)	overrepresented
GO:0005663	4	1834	2	6693	0.0221187	DNA replication factor C complex	overrepresented
GO:0005746	7	1831	8	6687	0.0266102	mitochondrial electron transport chain	overrepresented
GO:0008091	5	1833	4	6691	0.0266345	spectrin	overrepresented
GO:0005643	18	1820	34	6661	0.0272887	nuclear pore	overrepresented
GO:0005875	16	1822	29	6666	0.0283814	microtubule associated complex	overrepresented
GO:0005721	3	1835	1	6694	0.0334826	centric heterochromatin	overrepresented
GO:0005828	3	1835	1	6694	0.0334826	kinetochore microtubule	overrepresented
GO:0031307	3	1835	1	6694	0.0334826	integral to mitochondrial outer membrane	overrepresented
GO:0045120	3	1835	1	6694	0.0334826	pronucleus	overrepresented
GO:0005773	4	1834	3	6692	0.0428873	vacuole	overrepresented
GO:0005952	5	1833	5	6690	0.0439769	cAMP-dependent protein kinase complex	overrepresented
GO:0016281	5	1833	5	6690	0.0439769	eukaryotic translation initiation factor 4F complex	overrepresented
GO:0005674	2	1836	0	6695	0.0463769	transcription factor TFIIF complex	overrepresented
GO:0005685	2	1836	0	6695	0.0463769	snRNP U1	overrepresented
GO:0005787	2	1836	0	6695	0.0463769	signal peptidase complex	overrepresented
GO:0016528	2	1836	0	6695	0.0463769	sarcoplasm	overrepresented
GO:0031213	2	1836	0	6695	0.0463769	RSF complex	overrepresented
GO:0043512	2	1836	0	6695	0.0463769	inhibin A complex	overrepresented
GO:0005576	47	1791	460	6235	6.60383e-14	extracellular region	underrepresented
GO:0005887	100	1738	689	6006	2.50364e-11	integral to plasma membrane	underrepresented
GO:0016020	393	1445	1923	4772	1.84285e-10	membrane	underrepresented
GO:0005615	39	1799	337	6358	8.42089e-09	extracellular space	underrepresented
GO:0005886	71	1767	499	6196	1.01001e-08	plasma membrane	underrepresented
GO:0016021	237	1601	1223	5472	3.12201e-08	integral to membrane	underrepresented
GO:0005882	0	1838	55	6640	2.96064e-06	intermediate filament	underrepresented
GO:0005923	1	1837	42	6653	0.000596452	tight junction	underrepresented
GO:0045211	4	1834	63	6632	0.000845854	postsynaptic membrane	underrepresented
GO:0005578	14	1824	117	6578	0.00173714	extracellular matrix (sensu Metazoa)	underrepresented
GO:0008076	4	1834	52	6643	0.00534401	voltage-gated potassium channel complex	underrepresented
GO:0030173	0	1838	20	6675	0.0123252	integral to Golgi membrane	underrepresented
GO:0005581	0	1838	21	6674	0.0131326	collagen	underrepresented
GO:0005856	45	1793	240	6455	0.0154881	cytoskeleton	underrepresented
GO:0030133	0	1838	16	6679	0.0315988	transport vesicle	underrepresented

## Sheet: Method
Analysis of GO terms in gene lists:
Gene lists were prepared for the E2s and RINGs used in the current screen.
From these, the interaction partners of the E2s and RINGs were obtained from the human interactome or from the predicted/interologue databases.
Fisher’s exact test was used to calculate the probability of observing at least as many (few) genes annotated with each GO term as were observed in the list of genes.
This was performed for each GO term in the Biological Process, Molecular Function or Cellular Component GO-hierarchy.
The calculations could only be performed for GO-annotated genes. Hence, those genes which are present in the interactome but which did not have an annotation for the relevant GO-hierarchy (BP/MF/CC) were not included in the calculation, nor were genes which are not present in the interactome.
For GO terms which had a p-value < 0.05, we determined whether the GO term was over- or underrepresented within the gene list by calculating the p-value expected had one less gene been annotated with the GO term (where this was possible).
GO annotations were obtained from Bioconductor V2.0 (www.bioconductor.org) and all calculations were performed in R V2.5.1 (http://www.r-project.org/).
