# Supplementary material for: Analysis of the human E2 ubiquitin conjugating enzyme protein interaction network
Source: HighWire-hosted journal article supplement (doi:10.1101/gr.093963.109), 2009-06-23
Supplement: Markson_et_al_Supp_File_1.pdf [file Markson_et_al_Supp_File_1.pdf]

## Supplementary File 1: Evolutionary expansion within E2 and E3 RING protein families

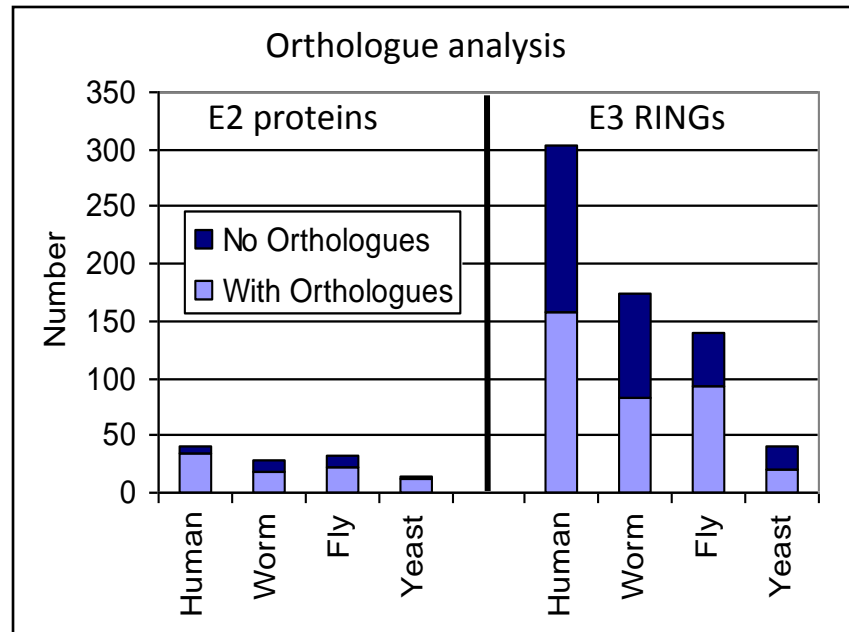

Throughout evolution there has been a significant increase in the number of E2 and E3-RING proteins encoded within different eukaryotic genomes. Consequently several human E2 proteins and many E3-RING proteins have no direct orthologue in fly, worm or yeast (dark blue areas in chart).
