# Supplementary material for: Analysis of the human E2 ubiquitin conjugating enzyme protein interaction network
Source: HighWire-hosted journal article supplement (doi:10.1101/gr.093963.109), 2009-06-23
Supplement: Markson_et_al_Supp_File_10.pdf [file Markson_et_al_Supp_File_10.pdf]

Supplementary File 10 : Analysis of the extended human E2/E3-RING binary interaction network

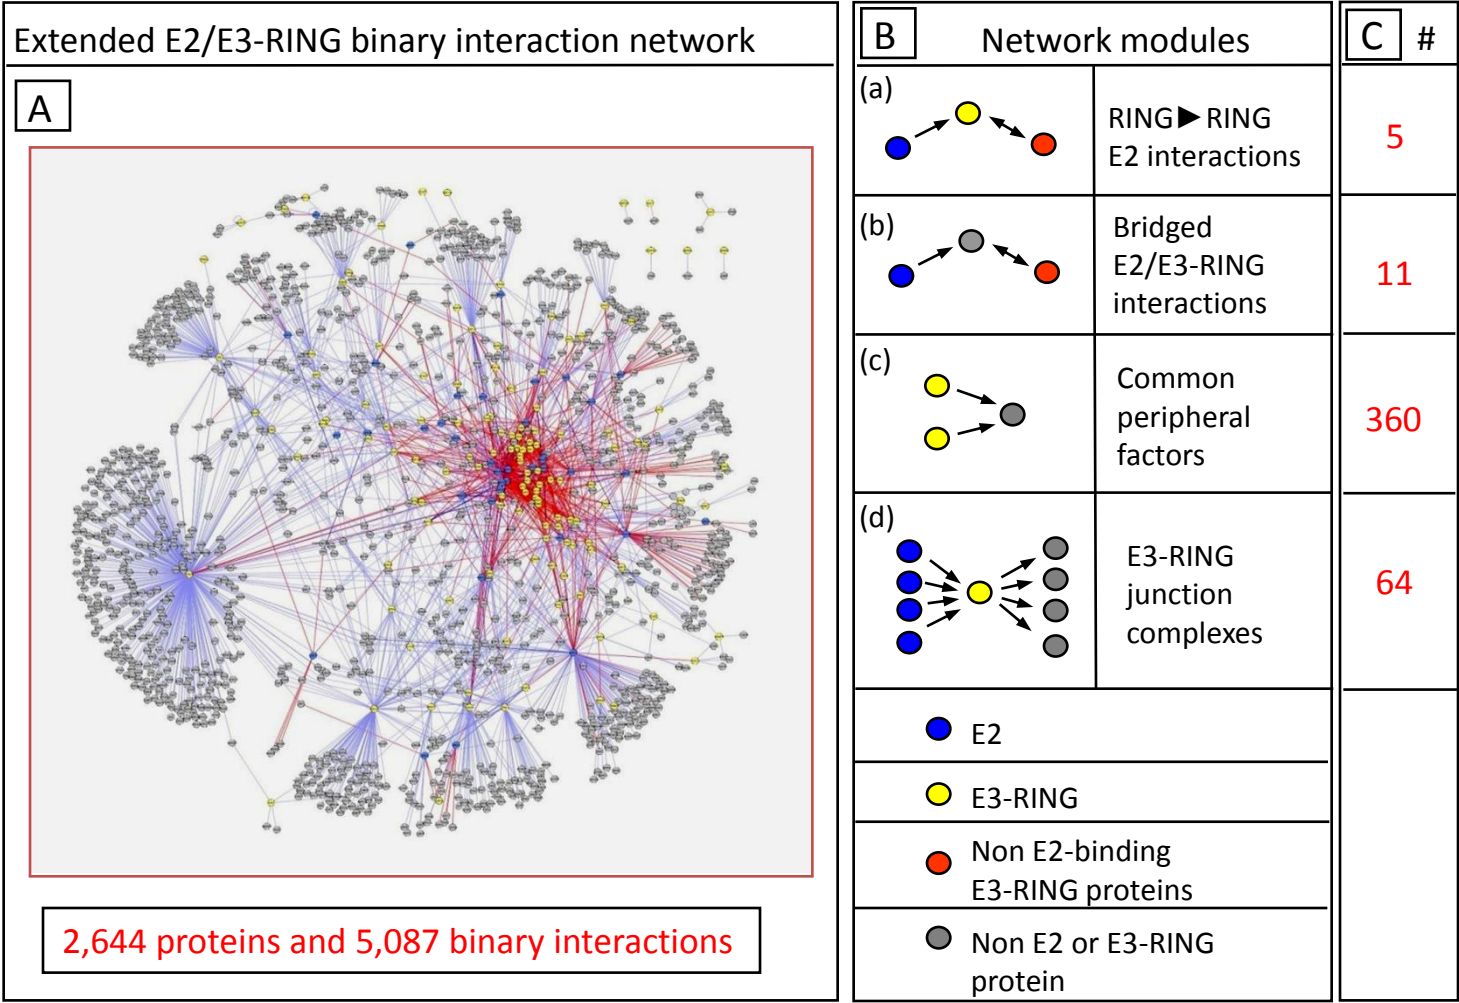

**Analysis of a one-step extended human E2/E3-RING protein interaction network:** (A) The human E2/E3-RING interaction network shown in Figure 1C was extended by one edge to include all known or Interolog interactions involving E2 or E3-RING proteins. Interactions between one-step neighbors of E2/E2 or E3-RING/E3-RING proteins are not shown in this network. BLUE edges represent known human interactions; RED edges represent novel interactions identified in this study; ORANGE edges represent known or Interolog interactions verified in this study and GREY edges represent Interolog interactions that were not verified in this study. E2 proteins are shown as BLUE nodes, E3-RING proteins as YELLOW nodes and all other proteins as GREY nodes. This network is also provided as a searchable Cytoscape file (Supplementary File 11). Four recurrent modules were identified within the extended network (B a-d) and the frequency with which each module was observed is shown in panel (C).
